# Supplementary material for: TRANSPARENT TESTA GLABRA 1 participates in flowering time regulation in Arabidopsis thaliana
Source: PeerJ. 2020 Jan 20;8:e8303. doi: 10.7717/peerj.8303 (PMC6977477; doi:10.7717/peerj.8303)
Supplement: Table S2 [file peerj-08-8303-s012.xlsx]

## Sheet: Legend
Descriptions for Table S2
header	description
experiment 1-3	for each set of genotypes 2-3 experiments were conducted
genotype	refer to the methods section and Table S7 for informations on the used overexpression lines, mutants and respective backgrounds.
trait	traits are described below
data_acquisition_project	For each set of genotype and experiment to be compared, one person was the person doing all phenotyping for a specific trait or trait group (seperated by lines). For each project one person was the major responsible person measuring most phenotypes. Please note that experiment 1 can not be compared in terms of temperature for the TTG1 mutants (despite ttg1-21/ttg1-22) and overexpression lines as …
parallel_other_condition	indicates if experiments were done in a way that they can be compared by statistics (same person, time, parental seed batch)
condition	See Table S1 for details on the growth conditions on the respective plant chambers.
n	number of plants in the respective experiment (biological replicates)
shapiro	Result from Shapiro-Wilk test conducted in R.
wilcoxonCol	Result from Wilcoxon-test (unpaired, two-sided) conducted in R. The respective genotype is compared to Col-0.
wilcoxoncop	Result from Wilcoxon-test (unpaired, two-sided) conducted in R. The respective genotype is compared to cop1-4.
wilcoxonLer	Result from Wilcoxon-test (unpaired, two-sided) conducted in R. The respective genotype is compared to Ler.
wilcoxonWs	Result from Wilcoxon-test (unpaired, two-sided) conducted in R. The respective genotype is compared to Ws.
wilcoxonTEMP	Result from Wilcoxon-test (unpaired, two-sided) conducted in R. Results obtained under the two conditions are compared when applicable (see "data_acquisition_project").
trait	description
bolting_days	number of days since the seeds were transferred after the stratification into the plant chamber and until the day when the first bud was seen
bolting_leaves	number of leaves on the day when the first bud was seen
leavesPERday	ratio: "bolting_leaves"/"bolting_days"
Additional comments
Plants were monitored at least every second day.
Please note that for every set of genotypes and experiment, parallel grown parental lines provided the used seed batch.
bold and red: P < 0.05

## Sheet: PHENOTYPINGresultsSTATISTICS
Supplementary Table S2. Results of phenotyping experiments and statistics.
				experiment 1																experiment 2																experiment 3
		genotype	trait	data_acquisition_project	parallel_other_condition	condition	mean	median	sd	n	shapiro	wilcoxonCol	wilcoxoncop	wilcoxonLer	wilcoxonWs	wilcoxonTEMP		genotype	trait	data_acquisition_project	parallel_other_condition	condition	mean	median	sd	n	shapiro	wilcoxonCol	wilcoxoncop	wilcoxonLer	wilcoxonWs	wilcoxonTEMP		genotype	trait	data_acquisition_project	parallel_other_condition	condition	mean	median	sd	n	shapiro	wilcoxonCol	wilcoxoncop	wilcoxonLer	wilcoxonWs	wilcoxonTEMP
TTG1 mutants		Col-0	bolting_days	ANSTTG1mutCol	no	warm	26	27	1.58114	9	0.0244458	1	NA	NA	NA	NA		Col-0	bolting_days	BPANS2017TTG1mut	yes, see below	warm	18.4211	17	3.2027	19	0.000139427	1	NA	0.0225414	7.77481e-05	0.000342019		Col-0	bolting_days	BPANS2017TTG1mut	yes, see below	warm	20.7857	19.5	2.51698	14	0.0225707	1	NA	0.00241762	0.000147692	1.50107e-05
		ttg1-9	bolting_days	ANSTTG1mutCol	no	warm	20.5556	20	0.726483	9	0.00767053	0.000314023	NA	NA	NA	NA		ttg1-9	bolting_days	BPANS2017TTG1mut	yes, see below	warm	14.4444	15	1.23603	9	0.0819344	8.9407e-05	NA	0.0266466	0.67347	0.0223559		ttg1-9	bolting_days	BPANS2017TTG1mut	yes, see below	warm	18	17	1.54919	11	0.112948	0.00492245	NA	0.251643	0.0850493	0.0153577
		ttg1-11	bolting_days	ANSTTG1mutCol	no	warm	23.25	24	1.75255	8	0.150054	0.00897255	NA	NA	NA	NA		ttg1-11	bolting_days	BPANS2017TTG1mut	yes, see below	warm	15.9	16	0.994429	10	0.152012	0.0108735	NA	0.932297	0.0256671	0.000862308		ttg1-11	bolting_days	BPANS2017TTG1mut	yes, see below	warm	18.6429	18	2.16997	14	0.000558739	0.00658473	NA	0.577022	0.0248427	1.31053e-05
		Ler	bolting_days	ANSTTG1mutCol	no	warm	NA	NA	NA	NA	NA	NA	NA	NA	NA	NA		Ler	bolting_days	BPANS2017TTG1mut	yes, see below	warm	16.1111	16	1.45297	9	0.600852	0.0225414	NA	1	0.0354635	0.0032949		Ler	bolting_days	BPANS2017TTG1mut	yes, see below	warm	18.5455	18	1.50756	11	2.30664e-07	0.00241762	NA	1	0.0207132	0.000253191
		ttg1-1	bolting_days	ANSTTG1mutCol	no	warm	NA	NA	NA	NA	NA	NA	NA	NA	NA	NA		ttg1-1	bolting_days	BPANS2017TTG1mut	yes, see below	warm	14.7778	15	0.971825	9	0.272886	8.8787e-05	NA	0.0448843	0.864825	0.00499094		ttg1-1	bolting_days	BPANS2017TTG1mut	yes, see below	warm	19.25	18	1.91288	12	0.00071327	0.055955	NA	0.240678	0.00439346	0.059828
		Ws	bolting_days	ANSTTG1mutCol	no	warm	NA	NA	NA	NA	NA	NA	NA	NA	NA	NA		Ws	bolting_days	BPANS2017TTG1mut	yes, see below	warm	14.7	14.5	1.05935	10	0.11051	7.77481e-05	NA	0.0354635	1	0.000174113		Ws	bolting_days	BPANS2017TTG1mut	yes, see below	warm	16.7857	16	1.67233	14	0.0423013	0.000147692	NA	0.0207132	1	0.000373469
		ttg1-10	bolting_days	ANSTTG1mutCol	no	warm	NA	NA	NA	NA	NA	NA	NA	NA	NA	NA		ttg1-10	bolting_days	BPANS2017TTG1mut	yes, see below	warm	16.2	16	1.61933	10	0.0252664	0.00991569	NA	0.965907	0.0327271	0.000500899		ttg1-10	bolting_days	BPANS2017TTG1mut	yes, see below	warm	19.5455	18	2.33939	11	0.00415219	0.115941	NA	0.338972	0.00627662	0.00130344
		Col-0	bolting_leaves	ANSTTG1mutCol	no	warm	18.8889	19	2.42097	9	0.538243	1	NA	NA	NA	NA		Col-0	bolting_leaves	BPANS2017TTG1mut	yes, see below	warm	12.4737	12	2.31825	19	0.17596	1	NA	0.000914581	0.000527396	0.000659777		Col-0	bolting_leaves	BPANS2017TTG1mut	yes, see below	warm	14	14	0.960769	14	0.0641214	1	NA	2.36885e-05	4.99443e-06	1.22424e-05
		ttg1-9	bolting_leaves	ANSTTG1mutCol	no	warm	13.1111	13	0.927961	9	0.0118908	0.000358194	NA	NA	NA	NA		ttg1-9	bolting_leaves	BPANS2017TTG1mut	yes, see below	warm	9.88889	10	1.16667	9	0.594832	0.00455209	NA	0.500056	0.398941	1		ttg1-9	bolting_leaves	BPANS2017TTG1mut	yes, see below	warm	11.5455	12	1.75292	11	0.229555	0.000340192	NA	0.0467134	0.00810541	0.004141
		ttg1-11	bolting_leaves	ANSTTG1mutCol	no	warm	15.125	14.5	2.58775	8	0.445756	0.0150538	NA	NA	NA	NA		ttg1-11	bolting_leaves	BPANS2017TTG1mut	yes, see below	warm	10.8	10.5	1.39841	10	0.263188	0.0601185	NA	0.0467824	0.0306671	0.00352317		ttg1-11	bolting_leaves	BPANS2017TTG1mut	yes, see below	warm	11.9286	12	1.94004	14	0.599667	0.00229188	NA	0.0219205	0.00252469	3.61865e-05
		Ler	bolting_leaves	ANSTTG1mutCol	no	warm	NA	NA	NA	NA	NA	NA	NA	NA	NA	NA		Ler	bolting_leaves	BPANS2017TTG1mut	yes, see below	warm	9.55556	10	0.527046	9	0.000419391	0.000914581	NA	1	0.850436	0.89144		Ler	bolting_leaves	BPANS2017TTG1mut	yes, see below	warm	10.1818	10	1.25045	11	0.0117019	2.36885e-05	NA	1	0.732601	0.948602
		ttg1-1	bolting_leaves	ANSTTG1mutCol	no	warm	NA	NA	NA	NA	NA	NA	NA	NA	NA	NA		ttg1-1	bolting_leaves	BPANS2017TTG1mut	yes, see below	warm	8.33333	8	1	9	0.364427	0.000146709	NA	0.0105172	0.0107285	0.0621007		ttg1-1	bolting_leaves	BPANS2017TTG1mut	yes, see below	warm	10.25	10	1.3568	12	0.0414154	2.13211e-05	NA	0.974083	0.748098	0.568166
		Ws	bolting_leaves	ANSTTG1mutCol	no	warm	NA	NA	NA	NA	NA	NA	NA	NA	NA	NA		Ws	bolting_leaves	BPANS2017TTG1mut	yes, see below	warm	9.5	9.5	0.527046	10	0.000253963	0.000527396	NA	0.850436	1	0.0827363		Ws	bolting_leaves	BPANS2017TTG1mut	yes, see below	warm	9.92857	10	0.916875	14	0.0480116	4.99443e-06	NA	0.732601	1	0.000458507
		ttg1-10	bolting_leaves	ANSTTG1mutCol	no	warm	NA	NA	NA	NA	NA	NA	NA	NA	NA	NA		ttg1-10	bolting_leaves	BPANS2017TTG1mut	yes, see below	warm	10.8	11	1.39841	10	0.151026	0.0466596	NA	0.0291119	0.0192395	0.00622934		ttg1-10	bolting_leaves	BPANS2017TTG1mut	yes, see below	warm	12.5455	12	1.21356	11	0.289644	0.00510741	NA	0.000995329	5.39257e-05	0.000356437
		Col-0	leavesPERday	ANSTTG1mutCol	no	warm	0.725556	0.71	0.0674743	9	0.46546	1	NA	NA	NA	NA		Col-0	leavesPERday	BPANS2017TTG1mut	yes, see below	warm	0.680526	0.69	0.0865046	19	0.218106	1	NA	0.00886498	0.134219	0.0931925		Col-0	leavesPERday	BPANS2017TTG1mut	yes, see below	warm	0.681429	0.68	0.0862784	14	0.656707	1	NA	0.00419989	0.0403361	0.816126
		ttg1-9	leavesPERday	ANSTTG1mutCol	no	warm	0.638889	0.62	0.0413656	9	0.054084	0.00765282	NA	NA	NA	NA		ttg1-9	leavesPERday	BPANS2017TTG1mut	yes, see below	warm	0.69	0.67	0.101366	9	0.505869	0.747924	NA	0.045698	0.389179	0.192013		ttg1-9	leavesPERday	BPANS2017TTG1mut	yes, see below	warm	0.647273	0.71	0.131916	11	0.22869	0.681028	NA	0.0808026	0.227274	0.953678
		ttg1-11	leavesPERday	ANSTTG1mutCol	no	warm	0.655	0.65	0.122007	8	0.728885	0.192013	NA	NA	NA	NA		ttg1-11	leavesPERday	BPANS2017TTG1mut	yes, see below	warm	0.681	0.68	0.0883742	10	0.540666	0.889869	NA	0.036422	0.469823	0.447038		ttg1-11	leavesPERday	BPANS2017TTG1mut	yes, see below	warm	0.645714	0.65	0.127141	14	0.58666	0.533774	NA	0.0690943	0.381288	1
		Ler	leavesPERday	ANSTTG1mutCol	no	warm	NA	NA	NA	NA	NA	NA	NA	NA	NA	NA		Ler	leavesPERday	BPANS2017TTG1mut	yes, see below	warm	0.596667	0.59	0.0441588	9	0.916125	0.00886498	NA	1	0.0360084	0.00519745		Ler	leavesPERday	BPANS2017TTG1mut	yes, see below	warm	0.553636	0.56	0.0889126	11	0.428969	0.00419989	NA	1	0.173932	0.0308643
		ttg1-1	leavesPERday	ANSTTG1mutCol	no	warm	NA	NA	NA	NA	NA	NA	NA	NA	NA	NA		ttg1-1	leavesPERday	BPANS2017TTG1mut	yes, see below	warm	0.565556	0.57	0.0714337	9	0.979817	0.00359237	NA	0.450802	0.0173433	0.537964		ttg1-1	leavesPERday	BPANS2017TTG1mut	yes, see below	warm	0.539167	0.515	0.0977435	12	0.852036	0.00197117	NA	0.640466	0.108387	0.283479
		Ws	leavesPERday	ANSTTG1mutCol	no	warm	NA	NA	NA	NA	NA	NA	NA	NA	NA	NA		Ws	leavesPERday	BPANS2017TTG1mut	yes, see below	warm	0.648	0.64	0.0480278	10	0.602298	0.134219	NA	0.0360084	1	0.0268099		Ws	leavesPERday	BPANS2017TTG1mut	yes, see below	warm	0.6	0.62	0.0938083	14	0.25957	0.0403361	NA	0.173932	1	0.751487
		ttg1-10	leavesPERday	ANSTTG1mutCol	no	warm	NA	NA	NA	NA	NA	NA	NA	NA	NA	NA		ttg1-10	leavesPERday	BPANS2017TTG1mut	yes, see below	warm	0.666	0.685	0.0583476	10	0.00498729	0.661071	NA	0.0135885	0.340679	0.0875315		ttg1-10	leavesPERday	BPANS2017TTG1mut	yes, see below	warm	0.646364	0.65	0.065616	11	0.403001	0.410013	NA	0.0142957	0.216085	0.82574
		Col-0	bolting_days	RQ2017TTG1mut	no	cold	24.9	23	3.66515	10	0.0101271	1	NA	0.00116283	0.000232754	NA		Col-0	bolting_days	BPANS2017TTG1mut	yes, see above	cold	24.375	24	3.20435	8	0.142415	1	NA	0.000755332	0.000386761	0.000342019		Col-0	bolting_days	BPANS2017TTG1mut	yes, see above	cold	28.6667	28	2.05971	12	0.00767943	1	NA	6.18419e-05	0.000228991	1.50107e-05
		ttg1-9	bolting_days	RQ2017TTG1mut	no	cold	18.3333	19	2.23607	9	0.052259	0.000938518	NA	0.651843	0.848576	NA		ttg1-9	bolting_days	BPANS2017TTG1mut	yes, see above	cold	16.125	16	1.12599	8	0.197317	0.000867607	NA	0.00374159	0.0315669	0.0223559		ttg1-9	bolting_days	BPANS2017TTG1mut	yes, see above	cold	20.6154	20	3.15009	13	0.00619033	4.57042e-05	NA	0.189147	0.914045	0.0153577
		ttg1-11	bolting_days	RQ2017TTG1mut	no	cold	20.3333	19	2.87228	9	0.647879	0.0183087	NA	0.235605	0.0803505	NA		ttg1-11	bolting_days	BPANS2017TTG1mut	yes, see above	cold	19.875	21	1.80772	8	0.000630339	0.0035882	NA	0.177621	0.00953992	0.000862308		ttg1-11	bolting_days	BPANS2017TTG1mut	yes, see above	cold	26.2	25	2.83347	15	0.0189488	0.0149885	NA	0.000380012	0.000233109	1.31053e-05
		Ler	bolting_days	RQ2017TTG1mut	no	cold	18.6667	19	0.516398	6	0.00135075	0.00116283	NA	1	0.560575	NA		Ler	bolting_days	BPANS2017TTG1mut	yes, see above	cold	18.7	18	1.63639	10	0.0441398	0.000755332	NA	1	0.0255789	0.0032949		Ler	bolting_days	BPANS2017TTG1mut	yes, see above	cold	21.6667	20	2.46183	12	0.000855537	6.18419e-05	NA	1	0.11637	0.000253191
		ttg1-1	bolting_days	RQ2017TTG1mut	no	cold	18.2222	19	1.30171	9	0.000255349	0.000209467	NA	0.83224	0.766187	NA		ttg1-1	bolting_days	BPANS2017TTG1mut	yes, see above	cold	16.8	16.5	1.54919	10	0.321496	0.000418842	NA	0.0187642	0.277032	0.00499094		ttg1-1	bolting_days	BPANS2017TTG1mut	yes, see above	cold	21.3333	20	3.114	12	0.108961	8.42204e-05	NA	0.62203	0.475353	0.059828
		Ws	bolting_days	RQ2017TTG1mut	no	cold	17.7778	19	1.71594	9	0.00564063	0.000232754	NA	0.560575	1	NA		Ws	bolting_days	BPANS2017TTG1mut	yes, see above	cold	17.2222	17	0.440959	9	1.68602e-05	0.000386761	NA	0.0255789	1	0.000174113		Ws	bolting_days	BPANS2017TTG1mut	yes, see above	cold	20.8462	20	4.01759	13	0.000195378	0.000228991	NA	0.11637	1	0.000373469
		ttg1-10	bolting_days	RQ2017TTG1mut	no	cold	22.2	21	3.32666	10	0.0504667	0.0651412	NA	0.00432791	0.00150091	NA		ttg1-10	bolting_days	BPANS2017TTG1mut	yes, see above	cold	21.4	21.5	2.54733	10	0.24807	0.103121	NA	0.0124057	0.00117965	0.000500899		ttg1-10	bolting_days	BPANS2017TTG1mut	yes, see above	cold	24.7143	23	4.58138	14	0.0178969	0.00648461	NA	0.0378323	0.00456279	0.00130344
		Col-0	bolting_leaves	RQ2017TTG1mut	no	cold	19	18.5	3.09121	10	0.742151	1	NA	0.00133116	0.000240405	NA		Col-0	bolting_leaves	BPANS2017TTG1mut	yes, see above	cold	18.25	19.5	3.28416	8	0.535696	1	NA	0.000335327	0.000547307	0.000659777		Col-0	bolting_leaves	BPANS2017TTG1mut	yes, see above	cold	19	19	1.12815	12	0.597605	1	NA	3.09625e-05	2.21905e-05	1.22424e-05
		ttg1-9	bolting_leaves	RQ2017TTG1mut	no	cold	13.5	14	1.69031	8	0.022195	0.00056181	NA	0.0103801	0.00897052	NA		ttg1-9	bolting_leaves	BPANS2017TTG1mut	yes, see above	cold	9.875	9.5	0.991031	8	0.00571063	0.000799884	NA	0.58597	0.609998	1		ttg1-9	bolting_leaves	BPANS2017TTG1mut	yes, see above	cold	13.9231	14	1.89128	13	0.0169326	8.76645e-05	NA	3.03377e-05	0.0077955	0.004141
		ttg1-11	bolting_leaves	RQ2017TTG1mut	no	cold	13.6667	13	2.91548	9	0.666697	0.00367323	NA	0.0206299	0.0208389	NA		ttg1-11	bolting_leaves	BPANS2017TTG1mut	yes, see above	cold	14.125	14	1.95941	8	0.778344	0.0229216	NA	0.000463117	0.000890707	0.00352317		ttg1-11	bolting_leaves	BPANS2017TTG1mut	yes, see above	cold	16.9333	17	2.34419	15	0.382909	0.0114774	NA	1.10559e-05	2.67528e-05	3.61865e-05
		Ler	bolting_leaves	RQ2017TTG1mut	no	cold	10.3333	10	1.50555	6	0.211705	0.00133116	NA	1	0.175594	NA		Ler	bolting_leaves	BPANS2017TTG1mut	yes, see above	cold	9.6	9	0.843274	10	0.00142586	0.000335327	NA	1	0.176829	0.89144		Ler	bolting_leaves	BPANS2017TTG1mut	yes, see above	cold	10.0833	10	0.996205	12	0.0803422	3.09625e-05	NA	1	0.00174256	0.948602
		ttg1-1	bolting_leaves	RQ2017TTG1mut	no	cold	11	11	2.23607	9	0.38712	0.000269469	NA	0.550301	1	NA		ttg1-1	bolting_leaves	BPANS2017TTG1mut	yes, see above	cold	9.2	9	0.788811	10	0.00362212	0.000290478	NA	0.265556	0.0227238	0.0621007		ttg1-1	bolting_leaves	BPANS2017TTG1mut	yes, see above	cold	10.4167	11	1.08362	12	0.0549183	2.91282e-05	NA	0.334015	0.00838277	0.568166
		Ws	bolting_leaves	RQ2017TTG1mut	no	cold	11	11	0.707107	9	0.048851	0.000240405	NA	0.175594	1	NA		Ws	bolting_leaves	BPANS2017TTG1mut	yes, see above	cold	10.1111	10	0.781736	9	0.0548452	0.000547307	NA	0.176829	1	0.0827363		Ws	bolting_leaves	BPANS2017TTG1mut	yes, see above	cold	12	12	1.35401	13	0.317386	2.21905e-05	NA	0.00174256	1	0.000458507
		ttg1-10	bolting_leaves	RQ2017TTG1mut	no	cold	17	16.5	2.44949	10	0.340064	0.137322	NA	0.0013202	0.00023886	NA		ttg1-10	bolting_leaves	BPANS2017TTG1mut	yes, see above	cold	13.3	13.5	1.70294	10	0.111158	0.00457301	NA	0.000450213	0.00158531	0.00622934		ttg1-10	bolting_leaves	BPANS2017TTG1mut	yes, see above	cold	15.7857	15	2.22498	14	0.134641	0.00138459	NA	1.53957e-05	6.71879e-05	0.000356437
		Col-0	leavesPERday	RQ2017TTG1mut	no	cold	0.763	0.77	0.0671731	10	0.88087	1	NA	0.00194765	0.000669152	NA		Col-0	leavesPERday	BPANS2017TTG1mut	yes, see above	cold	0.74625	0.76	0.0790908	8	0.378253	1	NA	0.000433573	0.00120601	0.0931925		Col-0	leavesPERday	BPANS2017TTG1mut	yes, see above	cold	0.665833	0.66	0.0731696	12	0.936003	1	NA	5.59524e-05	0.027006	0.816126
		ttg1-9	leavesPERday	RQ2017TTG1mut	no	cold	0.73	0.74	0.0888015	8	0.384367	0.397395	NA	0.00785478	0.0216333	NA		ttg1-9	leavesPERday	BPANS2017TTG1mut	yes, see above	cold	0.61625	0.6	0.0810533	8	0.556068	0.0114731	NA	0.0225433	0.4366	0.192013		ttg1-9	leavesPERday	BPANS2017TTG1mut	yes, see above	cold	0.679231	0.67	0.0492378	13	0.412049	0.494897	NA	2.93092e-05	0.00353475	0.953678
		ttg1-11	leavesPERday	RQ2017TTG1mut	no	cold	0.671111	0.68	0.0961047	9	0.982654	0.0370864	NA	0.033418	0.396376	NA		ttg1-11	leavesPERday	BPANS2017TTG1mut	yes, see above	cold	0.71	0.705	0.0526444	8	0.351934	0.316281	NA	0.000430598	0.000830666	0.447038		ttg1-11	leavesPERday	BPANS2017TTG1mut	yes, see above	cold	0.65	0.64	0.083666	15	0.211551	0.712838	NA	5.85947e-05	0.0912585	1
		Ler	leavesPERday	RQ2017TTG1mut	no	cold	0.553333	0.56	0.0784007	6	0.348358	0.00194765	NA	1	0.0956411	NA		Ler	leavesPERday	BPANS2017TTG1mut	yes, see above	cold	0.517	0.53	0.0535516	10	0.881228	0.000433573	NA	1	0.0117242	0.00519745		Ler	leavesPERday	BPANS2017TTG1mut	yes, see above	cold	0.471667	0.49	0.0755385	12	0.477466	5.59524e-05	NA	1	0.00242743	0.0308643
		ttg1-1	leavesPERday	RQ2017TTG1mut	no	cold	0.603333	0.63	0.103803	9	0.594052	0.0028073	NA	0.284065	0.718154	NA		ttg1-1	leavesPERday	BPANS2017TTG1mut	yes, see above	cold	0.551	0.545	0.0664078	10	0.736601	0.000841227	NA	0.284606	0.137082	0.537964		ttg1-1	leavesPERday	BPANS2017TTG1mut	yes, see above	cold	0.494167	0.49	0.0672118	12	0.918962	0.000132736	NA	0.521822	0.00495585	0.283479
		Ws	leavesPERday	RQ2017TTG1mut	no	cold	0.624444	0.63	0.0606447	9	0.177985	0.000669152	NA	0.0956411	1	NA		Ws	leavesPERday	BPANS2017TTG1mut	yes, see above	cold	0.588889	0.59	0.0442844	9	0.313325	0.00120601	NA	0.0117242	1	0.0268099		Ws	leavesPERday	BPANS2017TTG1mut	yes, see above	cold	0.588462	0.6	0.0910903	13	0.0917428	0.027006	NA	0.00242743	1	0.751487
		ttg1-10	leavesPERday	RQ2017TTG1mut	no	cold	0.768	0.765	0.063561	10	0.850085	0.849939	NA	0.00196273	0.000672841	NA		ttg1-10	leavesPERday	BPANS2017TTG1mut	yes, see above	cold	0.623	0.615	0.0545792	10	0.868979	0.00503723	NA	0.00244101	0.160837	0.0875315		ttg1-10	leavesPERday	BPANS2017TTG1mut	yes, see above	cold	0.65	0.68	0.0876181	14	0.0296685	0.917673	NA	0.000199848	0.0562742	0.82574
TTG1 overexpression lines		Col-0	bolting_days	ANSTTG1OEwarm	no	warm	26.4	27	2.35433	15	0.257978	1	0.00599408	NA	NA	NA		Col-0	bolting_days	BPANS201718TTG1OE	yes, see below	warm	19	19	2.44949	14	0.00202256	1	0.160769	NA	NA	1.61516e-05		Col-0	bolting_days	BPANS201718TTG1OE	yes, see below	warm	20.3	20	1.70294	10	0.00373661	1	0.760851	NA	NA	5.82834e-05
		OE01	bolting_days	ANSTTG1OEwarm	no	warm	40.7778	41	2.43812	9	0.148438	5.87235e-05	0.000100854	NA	NA	NA		OE01	bolting_days	BPANS201718TTG1OE	yes, see below	warm	34	31	5.67891	9	0.0135655	6.47534e-05	0.000243516	NA	NA	0.00659856		OE01	bolting_days	BPANS201718TTG1OE	yes, see below	warm	36.6667	35	2.39792	9	0.00559196	0.000166899	0.000345505	NA	NA	0.00400077
		OE02	bolting_days	ANSTTG1OEwarm	no	warm	42.375	43.5	4.8679	8	0.380968	0.00011169	0.000180911	NA	NA	NA		OE02	bolting_days	BPANS201718TTG1OE	yes, see below	warm	35.1538	35	3.55542	13	0.274384	8.93836e-06	5.40949e-05	NA	NA	0.00403256		OE02	bolting_days	BPANS201718TTG1OE	yes, see below	warm	36.5	35	3.40751	10	0.0851619	0.000114953	0.00023886	NA	NA	0.00647968
		OE03	bolting_days	ANSTTG1OEwarm	no	warm	34.8889	35	4.91031	9	0.562428	0.000693983	0.000194369	NA	NA	NA		OE03	bolting_days	BPANS201718TTG1OE	yes, see below	warm	31.75	30.5	6.96419	8	0.737794	0.000248519	0.000390448	NA	NA	0.00326012		OE03	bolting_days	BPANS201718TTG1OE	yes, see below	warm	34.5	35	4.96991	6	0.43996	0.000813161	0.00168993	NA	NA	0.00324499
		cop1-4	bolting_days	ANSTTG1OEwarm	no	warm	23.5385	23	2.60177	13	0.363303	0.00599408	1	NA	NA	NA		cop1-4	bolting_days	BPANS201718TTG1OE	yes, see below	warm	17.9	17	1.91195	10	0.0257548	0.160769	1	NA	NA	0.00014332		cop1-4	bolting_days	BPANS201718TTG1OE	yes, see below	warm	20.8889	20	3.21887	9	0.190631	0.760851	1	NA	NA	0.0028424
		OE19	bolting_days	ANSTTG1OEwarm	no	warm	25.7778	26	3.34581	9	0.156882	0.784761	0.117396	NA	NA	NA		OE19	bolting_days	BPANS201718TTG1OE	yes, see below	warm	19.4444	20	2.24227	9	0.189002	0.948444	0.230039	NA	NA	0.000450981		OE19	bolting_days	BPANS201718TTG1OE	yes, see below	warm	21.2222	20	4.52155	9	0.0848637	1	0.964054	NA	NA	0.00829622
		OE20	bolting_days	ANSTTG1OEwarm	no	warm	27.8182	27	1.47093	11	0.118398	0.084988	0.000452174	NA	NA	NA		OE20	bolting_days	BPANS201718TTG1OE	yes, see below	warm	24.8889	23	2.61937	9	0.00181891	5.96407e-05	0.000215121	NA	NA	0.00494113		OE20	bolting_days	BPANS201718TTG1OE	yes, see below	warm	22.2857	21	3.86067	7	0.834625	0.133562	0.520095	NA	NA	0.00036345
		OE21	bolting_days	ANSTTG1OEwarm	no	warm	24	23.5	2	12	0.0555945	0.0124784	0.472959	NA	NA	NA		OE21	bolting_days	BPANS201718TTG1OE	yes, see below	warm	18.9333	19	2.15362	15	0.1803	0.703531	0.265254	NA	NA	0.000221864		OE21	bolting_days	BPANS201718TTG1OE	yes, see below	warm	20.7	20	3.71334	10	0.0350685	0.900999	0.867308	NA	NA	0.00494265
		Col-0	bolting_leaves	ANSTTG1OEwarm	no	warm	18.7333	19	2.05171	15	0.0716484	1	7.56519e-06	NA	NA	NA		Col-0	bolting_leaves	BPANS201718TTG1OE	yes, see below	warm	12.7857	13	1.18831	14	0.368425	1	0.0011289	NA	NA	3.44658e-05		Col-0	bolting_leaves	BPANS201718TTG1OE	yes, see below	warm	14.8	15	1.54919	10	0.667817	1	0.00109833	NA	NA	6.33797e-05
		OE01	bolting_leaves	ANSTTG1OEwarm	no	warm	33.3333	33	2.5	9	0.34914	5.71983e-05	8.01634e-05	NA	NA	NA		OE01	bolting_leaves	BPANS201718TTG1OE	yes, see below	warm	22.6667	22	5.76628	9	0.323501	8.39161e-05	0.000261153	NA	NA	0.00290431		OE01	bolting_leaves	BPANS201718TTG1OE	yes, see below	warm	24.4444	24	2.83333	9	0.120095	0.000264457	0.000365966	NA	NA	0.0169529
		OE02	bolting_leaves	ANSTTG1OEwarm	no	warm	31	30.5	4.86973	8	0.810108	0.000109497	0.000142821	NA	NA	NA		OE02	bolting_leaves	BPANS201718TTG1OE	yes, see below	warm	23.9231	22	3.98877	13	0.010522	1.00252e-05	5.79431e-05	NA	NA	0.00168615		OE02	bolting_leaves	BPANS201718TTG1OE	yes, see below	warm	25.5	23.5	4.42844	10	0.0603686	0.000172654	0.000249825	NA	NA	0.0138685
		OE03	bolting_leaves	ANSTTG1OEwarm	no	warm	30.8889	32	3.62093	9	0.504895	5.6554e-05	7.90113e-05	NA	NA	NA		OE03	bolting_leaves	BPANS201718TTG1OE	yes, see below	warm	20.375	19	7.24938	8	0.104255	0.000727806	0.000421759	NA	NA	0.00603671		OE03	bolting_leaves	BPANS201718TTG1OE	yes, see below	warm	24.1667	23.5	1.94079	6	0.452205	0.00129845	0.00154688	NA	NA	0.00478303
		cop1-4	bolting_leaves	ANSTTG1OEwarm	no	warm	11.7692	12	1.36344	13	0.0635919	7.56519e-06	1	NA	NA	NA		cop1-4	bolting_leaves	BPANS201718TTG1OE	yes, see below	warm	10.6	11	1.3499	10	0.197745	0.0011289	1	NA	NA	0.000138263		cop1-4	bolting_leaves	BPANS201718TTG1OE	yes, see below	warm	11.6667	11	1.11803	9	0.0647581	0.00109833	1	NA	NA	0.00638867
		OE19	bolting_leaves	ANSTTG1OEwarm	no	warm	14.7778	15	1.71594	9	0.00575622	0.00102271	0.00169539	NA	NA	NA		OE19	bolting_leaves	BPANS201718TTG1OE	yes, see below	warm	11.8889	12	1.05409	9	0.0391269	0.0794168	0.0610023	NA	NA	0.00651369		OE19	bolting_leaves	BPANS201718TTG1OE	yes, see below	warm	12.7778	12	1.98606	9	0.0266555	0.0345301	0.268338	NA	NA	0.0501623
		OE20	bolting_leaves	ANSTTG1OEwarm	no	warm	16.5455	16	0.934199	11	0.127206	0.00252708	2.79216e-05	NA	NA	NA		OE20	bolting_leaves	BPANS201718TTG1OE	yes, see below	warm	15.5556	16	1.13039	9	0.248496	0.000313406	0.000253025	NA	NA	0.0326918		OE20	bolting_leaves	BPANS201718TTG1OE	yes, see below	warm	13.7143	14	1.60357	7	0.876553	0.196699	0.0162935	NA	NA	0.000942058
		OE21	bolting_leaves	ANSTTG1OEwarm	no	warm	14.1667	14	1.2673	12	0.449349	9.19269e-05	0.000457573	NA	NA	NA		OE21	bolting_leaves	BPANS201718TTG1OE	yes, see below	warm	11.2667	11	1.48645	15	0.540343	0.00985871	0.334666	NA	NA	0.00116248		OE21	bolting_leaves	BPANS201718TTG1OE	yes, see below	warm	12.4	12	1.42984	10	0.00376123	0.00484868	0.248025	NA	NA	0.0236139
		Col-0	leavesPERday	ANSTTG1OEwarm	no	warm	0.710667	0.7	0.0614662	15	0.058699	1	1.42707e-05	NA	NA	NA		Col-0	leavesPERday	BPANS201718TTG1OE	yes, see below	warm	0.68	0.675	0.0807656	14	0.351913	1	0.00979102	NA	NA	0.0976255		Col-0	leavesPERday	BPANS201718TTG1OE	yes, see below	warm	0.734	0.75	0.0973196	10	0.302	1	0.00777244	NA	NA	0.315866
		OE01	leavesPERday	ANSTTG1OEwarm	no	warm	0.817778	0.81	0.0538	9	0.860693	0.00125113	0.000104112	NA	NA	NA		OE01	leavesPERday	BPANS201718TTG1OE	yes, see below	warm	0.664444	0.68	0.103212	9	0.0456488	1	0.0778637	NA	NA	0.0709072		OE01	leavesPERday	BPANS201718TTG1OE	yes, see below	warm	0.666667	0.66	0.0514782	9	0.196199	0.0365878	0.0101288	NA	NA	0.453485
		OE02	leavesPERday	ANSTTG1OEwarm	no	warm	0.73625	0.755	0.109406	8	0.0234756	0.270946	0.00258427	NA	NA	NA		OE02	leavesPERday	BPANS201718TTG1OE	yes, see below	warm	0.68	0.66	0.0778888	13	0.801877	1	0.00617669	NA	NA	0.013624		OE02	leavesPERday	BPANS201718TTG1OE	yes, see below	warm	0.696	0.7	0.0793305	10	0.507277	0.239903	0.0060751	NA	NA	0.755558
		OE03	leavesPERday	ANSTTG1OEwarm	no	warm	0.888889	0.88	0.0506074	9	0.859895	6.27896e-05	0.000104112	NA	NA	NA		OE03	leavesPERday	BPANS201718TTG1OE	yes, see below	warm	0.64375	0.71	0.157837	8	0.111327	1	0.26349	NA	NA	0.469122		OE03	leavesPERday	BPANS201718TTG1OE	yes, see below	warm	0.711667	0.75	0.10496	6	0.437246	0.785804	0.032943	NA	NA	0.40808
		cop1-4	leavesPERday	ANSTTG1OEwarm	no	warm	0.506923	0.52	0.0843983	13	0.115131	1.42707e-05	1	NA	NA	NA		cop1-4	leavesPERday	BPANS201718TTG1OE	yes, see below	warm	0.594	0.595	0.0571936	10	0.476893	0.00979102	1	NA	NA	0.0350723		cop1-4	leavesPERday	BPANS201718TTG1OE	yes, see below	warm	0.568889	0.55	0.0880972	9	0.0912941	0.00777244	1	NA	NA	0.0913698
		OE19	leavesPERday	ANSTTG1OEwarm	no	warm	0.578889	0.62	0.0506074	9	0.00916072	5.85037e-05	0.0544333	NA	NA	NA		OE19	leavesPERday	BPANS201718TTG1OE	yes, see below	warm	0.614444	0.6	0.0517472	9	0.500011	0.0716832	0.45604	NA	NA	0.131322		OE19	leavesPERday	BPANS201718TTG1OE	yes, see below	warm	0.611111	0.64	0.0666041	9	0.194921	0.00847613	0.264953	NA	NA	0.0310452
		OE20	leavesPERday	ANSTTG1OEwarm	no	warm	0.595455	0.59	0.045905	11	0.476431	0.000301687	0.00300042	NA	NA	NA		OE20	leavesPERday	BPANS201718TTG1OE	yes, see below	warm	0.63	0.61	0.0597913	9	0.566148	0.113852	0.118534	NA	NA	0.328374		OE20	leavesPERday	BPANS201718TTG1OE	yes, see below	warm	0.625714	0.65	0.083238	7	0.0351434	0.0212639	0.166917	NA	NA	0.0279898
		OE21	leavesPERday	ANSTTG1OEwarm	no	warm	0.596667	0.61	0.0852092	12	0.339193	0.00132818	0.0164061	NA	NA	NA		OE21	leavesPERday	BPANS201718TTG1OE	yes, see below	warm	0.596	0.59	0.0531574	15	0.653868	0.00665567	0.933213	NA	NA	0.00326074		OE21	leavesPERday	BPANS201718TTG1OE	yes, see below	warm	0.612	0.63	0.0934285	10	0.0196449	0.0086704	0.101114	NA	NA	0.0354355
		Col-0	bolting_days	RQTTG1OEcold	no	cold	26.75	26	3.33371	12	0.237823	1	0.292285	NA	NA	NA		Col-0	bolting_days	BPANS201718TTG1OE	yes, see above	cold	25.4615	26	2.56955	13	0.160141	1	0.178887	NA	NA	1.61516e-05		Col-0	bolting_days	BPANS201718TTG1OE	yes, see above	cold	26.7692	27	2.5217	13	0.0329439	1	0.193199	NA	NA	5.82834e-05
		OE01	bolting_days	RQTTG1OEcold	no	cold	43.5	45	5.12619	10	0.00166676	0.000105696	0.000156565	NA	NA	NA		OE01	bolting_days	BPANS201718TTG1OE	yes, see above	cold	42.6429	42	2.79029	14	0.0690933	9.05418e-06	3.61143e-05	NA	NA	0.00659856		OE01	bolting_days	BPANS201718TTG1OE	yes, see above	cold	41.9167	42	3.91868	12	0.297916	1.69639e-05	1.29542e-05	NA	NA	0.00400077
		OE02	bolting_days	RQTTG1OEcold	no	cold	37.4	40	7.93305	10	0.00797036	0.0105885	0.0140047	NA	NA	NA		OE02	bolting_days	BPANS201718TTG1OE	yes, see above	cold	39.6923	41	3.32627	13	0.0122998	1.38326e-05	5.08925e-05	NA	NA	0.00403256		OE02	bolting_days	BPANS201718TTG1OE	yes, see above	cold	41.6154	41	3.04243	13	0.0736257	1.0044e-05	7.48884e-06	NA	NA	0.00647968
		OE03	bolting_days	RQTTG1OEcold	no	cold	31	30	7	9	0.513863	0.17354	0.0799252	NA	NA	NA		OE03	bolting_days	BPANS201718TTG1OE	yes, see above	cold	45.8889	43	8.25295	9	0.115736	9.50103e-05	0.000237323	NA	NA	0.00326012		OE03	bolting_days	BPANS201718TTG1OE	yes, see above	cold	48.9286	45	9.91862	14	0.118414	8.43193e-06	5.97626e-06	NA	NA	0.00324499
		cop1-4	bolting_days	RQTTG1OEcold	no	cold	25.2	24.5	1.39841	10	0.00372025	0.292285	1	NA	NA	NA		cop1-4	bolting_days	BPANS201718TTG1OE	yes, see above	cold	24.4	24	1.17379	10	0.10798	0.178887	1	NA	NA	0.00014332		cop1-4	bolting_days	BPANS201718TTG1OE	yes, see above	cold	25.5714	25.5	2.13809	14	0.0277991	0.193199	1	NA	NA	0.0028424
		OE19	bolting_days	RQTTG1OEcold	no	cold	26.4444	26	2.29734	9	0.0251954	0.912341	0.232731	NA	NA	NA		OE19	bolting_days	BPANS201718TTG1OE	yes, see above	cold	24.2308	24	2.71274	13	0.199881	0.151649	0.652824	NA	NA	0.000450981		OE19	bolting_days	BPANS201718TTG1OE	yes, see above	cold	26.6667	27	4.02965	15	0.0190377	0.88656	0.62074	NA	NA	0.00829622
		OE20	bolting_days	RQTTG1OEcold	no	cold	33.2	33.5	2.39444	10	0.793043	0.000612707	0.000156565	NA	NA	NA		OE20	bolting_days	BPANS201718TTG1OE	yes, see above	cold	30.3333	30	4.94975	9	0.000321265	0.00298523	0.000301371	NA	NA	0.00494113		OE20	bolting_days	BPANS201718TTG1OE	yes, see above	cold	33.3846	32	3.79777	13	0.057133	0.000102952	1.94146e-05	NA	NA	0.00036345
		OE21	bolting_days	RQTTG1OEcold	no	cold	26.1111	26	1.90029	9	0.14554	0.715529	0.325802	NA	NA	NA		OE21	bolting_days	BPANS201718TTG1OE	yes, see above	cold	26.8571	26	2.19306	7	0.0107331	0.264986	0.0101652	NA	NA	0.000221864		OE21	bolting_days	BPANS201718TTG1OE	yes, see above	cold	27.4286	27	2.69921	7	0.0615501	0.578804	0.131741	NA	NA	0.00494265
		Col-0	bolting_leaves	RQTTG1OEcold	no	cold	13.75	13	3.72034	12	0.367885	1	0.0147436	NA	NA	NA		Col-0	bolting_leaves	BPANS201718TTG1OE	yes, see above	cold	18.6923	19	2.25036	13	0.0229893	1	0.000264261	NA	NA	3.44658e-05		Col-0	bolting_leaves	BPANS201718TTG1OE	yes, see above	cold	18.9231	19	1.11516	13	0.436204	1	9.43902e-06	NA	NA	6.33797e-05
		OE01	bolting_leaves	RQTTG1OEcold	no	cold	28	29	5.2915	10	0.0244969	0.000246589	0.000167801	NA	NA	NA		OE01	bolting_leaves	BPANS201718TTG1OE	yes, see above	cold	31.2143	33	4.07957	14	0.0707191	9.62105e-06	3.74416e-05	NA	NA	0.00290431		OE01	bolting_leaves	BPANS201718TTG1OE	yes, see above	cold	29.3333	29	5.1757	12	0.672323	2.2768e-05	1.56588e-05	NA	NA	0.0169529
		OE02	bolting_leaves	RQTTG1OEcold	no	cold	21.9	23.5	7.07814	10	0.189697	0.0157974	0.00428622	NA	NA	NA		OE02	bolting_leaves	BPANS201718TTG1OE	yes, see above	cold	30.3846	29	4.13397	13	0.217871	1.46126e-05	5.22465e-05	NA	NA	0.00168615		OE02	bolting_leaves	BPANS201718TTG1OE	yes, see above	cold	29.2308	29	2.27866	13	0.622311	1.46126e-05	9.8059e-06	NA	NA	0.0138685
		OE03	bolting_leaves	RQTTG1OEcold	no	cold	19	14	9.04157	9	0.104445	0.22381	0.00428998	NA	NA	NA		OE03	bolting_leaves	BPANS201718TTG1OE	yes, see above	cold	33	32	4.3589	9	0.564166	9.28324e-05	0.000215121	NA	NA	0.00603671		OE03	bolting_leaves	BPANS201718TTG1OE	yes, see above	cold	32.0714	31	5.35601	14	0.767944	1.00568e-05	6.57143e-06	NA	NA	0.00478303
		cop1-4	bolting_leaves	RQTTG1OEcold	no	cold	10.4	10	1.07497	10	0.176996	0.0147436	1	NA	NA	NA		cop1-4	bolting_leaves	BPANS201718TTG1OE	yes, see above	cold	13.5	13	0.707107	10	0.00208794	0.000264261	1	NA	NA	0.000138263		cop1-4	bolting_leaves	BPANS201718TTG1OE	yes, see above	cold	13.2857	13	1.13873	14	0.329883	9.43902e-06	1	NA	NA	0.00638867
		OE19	bolting_leaves	RQTTG1OEcold	no	cold	12.4444	12	1.87824	9	0.223197	0.540626	0.0214192	NA	NA	NA		OE19	bolting_leaves	BPANS201718TTG1OE	yes, see above	cold	13.7692	14	1.5359	13	0.681315	0.000140191	0.623203	NA	NA	0.00651369		OE19	bolting_leaves	BPANS201718TTG1OE	yes, see above	cold	13.9333	14	0.96115	15	0.0879156	5.65015e-06	0.130129	NA	NA	0.0501623
		OE20	bolting_leaves	RQTTG1OEcold	no	cold	15.3333	15	2.91548	9	0.993239	0.238962	0.00148739	NA	NA	NA		OE20	bolting_leaves	BPANS201718TTG1OE	yes, see above	cold	17.8889	18	2.57121	9	0.499253	0.47394	0.00188268	NA	NA	0.0326918		OE20	bolting_leaves	BPANS201718TTG1OE	yes, see above	cold	18.8462	19	2.67227	13	0.566563	0.916645	2.33098e-05	NA	NA	0.000942058
		OE21	bolting_leaves	RQTTG1OEcold	no	cold	11.5556	11	1.50923	9	0.179561	0.172688	0.0999777	NA	NA	NA		OE21	bolting_leaves	BPANS201718TTG1OE	yes, see above	cold	14	14	1	7	0.0158738	0.00145661	0.308396	NA	NA	0.00116248		OE21	bolting_leaves	BPANS201718TTG1OE	yes, see above	cold	14.2857	14	1.1127	7	0.481755	0.000314946	0.0969317	NA	NA	0.0236139
		Col-0	leavesPERday	RQTTG1OEcold	no	cold	14.75	13	5.8329	12	0.473143	1	0.00178482	NA	NA	NA		Col-0	leavesPERday	BPANS201718TTG1OE	yes, see above	cold	0.733846	0.73	0.0597967	13	0.304642	1	5.48009e-05	NA	NA	0.0976255		Col-0	leavesPERday	BPANS201718TTG1OE	yes, see above	cold	0.710769	0.7	0.0622443	13	0.26022	1	1.25489e-05	NA	NA	0.315866
		OE01	leavesPERday	RQTTG1OEcold	no	cold	25	27.5	5.4365	10	0.0593055	0.00149887	0.000175616	NA	NA	NA		OE01	leavesPERday	BPANS201718TTG1OE	yes, see above	cold	0.730714	0.765	0.0713026	14	0.0130802	0.883223	6.2183e-05	NA	NA	0.0709072		OE01	leavesPERday	BPANS201718TTG1OE	yes, see above	cold	0.704167	0.675	0.136878	12	0.0060334	0.2983	2.80873e-05	NA	NA	0.453485
		OE02	leavesPERday	RQTTG1OEcold	no	cold	19.5	20	7.57555	10	0.812177	0.0919441	0.00166539	NA	NA	NA		OE02	leavesPERday	BPANS201718TTG1OE	yes, see above	cold	0.763077	0.74	0.0729594	13	0.599441	0.395522	5.67185e-05	NA	NA	0.013624		OE02	leavesPERday	BPANS201718TTG1OE	yes, see above	cold	0.706923	0.73	0.082501	13	0.12731	0.816847	2.49869e-05	NA	NA	0.755558
		OE03	leavesPERday	RQTTG1OEcold	no	cold	19.5556	15	9.07071	9	0.0828006	0.252561	0.000676544	NA	NA	NA		OE03	leavesPERday	BPANS201718TTG1OE	yes, see above	cold	0.727778	0.74	0.0846726	9	0.692868	0.892909	0.000615474	NA	NA	0.469122		OE03	leavesPERday	BPANS201718TTG1OE	yes, see above	cold	0.666429	0.67	0.106309	14	0.483696	0.102338	0.000146819	NA	NA	0.40808
		cop1-4	leavesPERday	RQTTG1OEcold	no	cold	7.1	7.5	2.84605	10	0.484474	0.00178482	1	NA	NA	NA		cop1-4	leavesPERday	BPANS201718TTG1OE	yes, see above	cold	0.553	0.54	0.0298329	10	0.2126	5.48009e-05	1	NA	NA	0.0350723		cop1-4	leavesPERday	BPANS201718TTG1OE	yes, see above	cold	0.520714	0.52	0.0373063	14	0.00389888	1.25489e-05	1	NA	NA	0.0913698
		OE19	leavesPERday	RQTTG1OEcold	no	cold	11.7778	13	2.48886	9	0.214985	0.406834	0.0043951	NA	NA	NA		OE19	leavesPERday	BPANS201718TTG1OE	yes, see above	cold	0.570769	0.58	0.0617065	13	0.401042	4.82791e-05	0.313657	NA	NA	0.131322		OE19	leavesPERday	BPANS201718TTG1OE	yes, see above	cold	0.535333	0.54	0.0819291	15	0.179313	2.37903e-05	0.416664	NA	NA	0.0310452
		OE20	leavesPERday	RQTTG1OEcold	no	cold	10.5	12	5.70088	10	0.207313	0.209238	0.111735	NA	NA	NA		OE20	leavesPERday	BPANS201718TTG1OE	yes, see above	cold	0.596667	0.6	0.0804674	9	0.565244	0.000898411	0.145775	NA	NA	0.328374		OE20	leavesPERday	BPANS201718TTG1OE	yes, see above	cold	0.566923	0.59	0.0673776	13	0.0327281	8.89423e-05	0.00831495	NA	NA	0.0279898
		OE21	leavesPERday	RQTTG1OEcold	no	cold	9.33333	10	4.272	9	0.0932985	0.06832	0.231887	NA	NA	NA		OE21	leavesPERday	BPANS201718TTG1OE	yes, see above	cold	0.522857	0.5	0.0335233	7	0.0111113	0.000320002	0.0795078	NA	NA	0.00326074		OE21	leavesPERday	BPANS201718TTG1OE	yes, see above	cold	0.525714	0.52	0.0784978	7	0.466821	0.000824052	0.87955	NA	NA	0.0354355
TTG1 gene regulatory network bHLH mutants		Col-0	bolting_days	LTANS2017bHLHmut	no	warm	26.4	27	2.35433	15	0.257978	1	NA	NA	NA	NA		Col-0	bolting_days	BP2018bHLH_mutOE	no	warm	24.8571	23.5	2.56776	14	0.0043419	1	NA	NA	NA	NA
		gl3-3	bolting_days	LTANS2017bHLHmut	no	warm	32	33	3.68179	10	0.0744783	0.00170903	NA	NA	NA	NA		gl3-3	bolting_days	BP2018bHLH_mutOE	no	warm	24	24	3.04512	12	0.0227193	0.599031	NA	NA	NA	NA
		egl3-19114	bolting_days	LTANS2017bHLHmut	no	warm	28.1111	28	2.02759	9	0.221233	0.0833249	NA	NA	NA	NA		egl3-19114	bolting_days	BP2018bHLH_mutOE	no	warm	24	24	0	12	NA	0.75989	NA	NA	NA	NA
		tt8-SALK	bolting_days	LTANS2017bHLHmut	no	warm	31.25	32	2.26134	12	0.0714041	8.26089e-05	NA	NA	NA	NA		tt8-SALK	bolting_days	BP2018bHLH_mutOE	no	warm	23.5333	23	2.2318	15	0.049794	0.177077	NA	NA	NA	NA
		bHLH12	bolting_days	LTANS2017bHLHmut	no	warm	25.4615	26	1.8081	13	0.040091	0.217991	NA	NA	NA	NA		bHLH12	bolting_days	BP2018bHLH_mutOE	no	warm	24.0909	24	1.30035	11	0.000615842	0.954777	NA	NA	NA	NA
		Col-0	bolting_leaves	LTANS2017bHLHmut	no	warm	18.7333	19	2.05171	15	0.0716484	1	NA	NA	NA	NA		Col-0	bolting_leaves	BP2018bHLH_mutOE	no	warm	16.4286	16	1.74154	14	0.189763	1	NA	NA	NA	NA
		gl3-3	bolting_leaves	LTANS2017bHLHmut	no	warm	18.6	18.5	3.30656	10	0.47503	0.631453	NA	NA	NA	NA		gl3-3	bolting_leaves	BP2018bHLH_mutOE	no	warm	17.4167	17	2.2747	12	0.839425	0.274017	NA	NA	NA	NA
		egl3-19114	bolting_leaves	LTANS2017bHLHmut	no	warm	18.4444	19	1.81046	9	0.452399	0.715247	NA	NA	NA	NA		egl3-19114	bolting_leaves	BP2018bHLH_mutOE	no	warm	18.3333	18	1.07309	12	0.0227876	0.0103925	NA	NA	NA	NA
		tt8-SALK	bolting_leaves	LTANS2017bHLHmut	no	warm	23.1667	24	2.97973	12	0.409127	0.000578531	NA	NA	NA	NA		tt8-SALK	bolting_leaves	BP2018bHLH_mutOE	no	warm	16.6	17	1.76473	15	0.318093	0.706488	NA	NA	NA	NA
		bHLH12	bolting_leaves	LTANS2017bHLHmut	no	warm	19	19	3.21455	13	0.221521	0.851396	NA	NA	NA	NA		bHLH12	bolting_leaves	BP2018bHLH_mutOE	no	warm	17.4545	17	1.21356	11	0.0635217	0.125464	NA	NA	NA	NA
		Col-0	leavesPERday	LTANS2017bHLHmut	no	warm	0.710667	0.7	0.0614662	15	0.058699	1	NA	NA	NA	NA		Col-0	leavesPERday	BP2018bHLH_mutOE	no	warm	0.662143	0.65	0.0510171	14	0.840078	1	NA	NA	NA	NA
		gl3-3	leavesPERday	LTANS2017bHLHmut	no	warm	0.588	0.58	0.121546	10	0.780031	0.00898502	NA	NA	NA	NA		gl3-3	leavesPERday	BP2018bHLH_mutOE	no	warm	0.729167	0.755	0.0836071	12	0.0108224	0.00351101	NA	NA	NA	NA
		egl3-19114	leavesPERday	LTANS2017bHLHmut	no	warm	0.658889	0.66	0.0566667	9	0.729727	0.0452473	NA	NA	NA	NA		egl3-19114	leavesPERday	BP2018bHLH_mutOE	no	warm	0.764167	0.75	0.0452183	12	0.0140137	8.44852e-05	NA	NA	NA	NA
		tt8-SALK	leavesPERday	LTANS2017bHLHmut	no	warm	0.744167	0.75	0.0936588	12	0.526822	0.405592	NA	NA	NA	NA		tt8-SALK	leavesPERday	BP2018bHLH_mutOE	no	warm	0.709333	0.7	0.0757314	15	0.635633	0.0688669	NA	NA	NA	NA
		bHLH12	leavesPERday	LTANS2017bHLHmut	no	warm	0.741538	0.75	0.0874496	13	0.119472	0.165763	NA	NA	NA	NA		bHLH12	leavesPERday	BP2018bHLH_mutOE	no	warm	0.727273	0.75	0.0663462	11	0.23091	0.018121	NA	NA	NA	NA
																				Mutants and overexpression lines were analyzed in one experiment: only one Col-0-reference!
TTG1 gene regulatory network bHLH overexpression lines		Col-0	bolting_days	AM2018bHLH_OE	no	warm	23.125	21.5	3.52288	8	0.0312371	1	NA	NA	NA	NA		Col-0	bolting_days	BP2018bHLH_mutOE	see above
		OE04	bolting_days	AM2018bHLH_OE	no	warm	21.1429	21	2.54484	7	0.967263	0.347558	NA	NA	NA	NA		OE04	bolting_days	BP2018bHLH_mutOE	no	warm	23.8	24	0.941124	15	0.0480786	0.586542	NA	NA	NA	NA
		OE05	bolting_days	AM2018bHLH_OE	no	warm	21.2727	21	3.71728	11	0.181478	0.259036	NA	NA	NA	NA		OE05	bolting_days	BP2018bHLH_mutOE	no	warm	25.5	25.5	3.53553	2	NA	NA	NA	NA	NA	NA
		OE06	bolting_days	AM2018bHLH_OE	no	warm	23.8	23.5	3.29309	10	0.285699	0.499575	NA	NA	NA	NA		OE06	bolting_days	BP2018bHLH_mutOE	no	warm	23.3846	23	2.18092	13	0.000150382	0.0724957	NA	NA	NA	NA
		OE07	bolting_days	AM2018bHLH_OE	no	warm	26	23.5	6.67618	8	0.168249	0.524932	NA	NA	NA	NA		OE07	bolting_days	BP2018bHLH_mutOE	no	warm	23.6	23.5	2.01108	10	0.195087	0.394302	NA	NA	NA	NA
		OE08	bolting_days	AM2018bHLH_OE	no	warm	24.6364	21	7.7881	11	0.00010271	0.64248	NA	NA	NA	NA		OE08	bolting_days	BP2018bHLH_mutOE	no	warm	26.9	28	2.99815	10	0.376941	0.07293	NA	NA	NA	NA
		OE09	bolting_days	AM2018bHLH_OE	no	warm	22.75	22	2.18763	8	0.0483223	0.828461	NA	NA	NA	NA		OE09	bolting_days	BP2018bHLH_mutOE	no	warm	25.3333	25	2.87228	9	0.668622	0.623334	NA	NA	NA	NA
		OE10	bolting_days	AM2018bHLH_OE	no	warm	22.9375	22.5	3.75	16	0.00305318	0.901342	NA	NA	NA	NA		OE10	bolting_days	BP2018bHLH_mutOE	no	warm	24.2727	24	2.24013	11	0.199426	0.822696	NA	NA	NA	NA
		OE11	bolting_days	AM2018bHLH_OE	no	warm	21.9286	21	2.94734	14	0.000263928	0.24687	NA	NA	NA	NA		OE11	bolting_days	BP2018bHLH_mutOE	no	warm	23.6923	23	2.32324	13	0.0198394	0.155442	NA	NA	NA	NA
		OE12	bolting_days	AM2018bHLH_OE	no	warm	24	21	6.733	7	0.0163562	0.638592	NA	NA	NA	NA		OE12	bolting_days	BP2018bHLH_mutOE	no	warm	23.7778	24	2.04803	9	0.0492759	0.33397	NA	NA	NA	NA
		OE13	bolting_days	AM2018bHLH_OE	no	warm	24.0833	22.5	4.90748	12	0.0558295	0.968923	NA	NA	NA	NA		OE13	bolting_days	BP2018bHLH_mutOE	no	warm	22.9	23	1.1005	10	0.359122	0.054875	NA	NA	NA	NA
		OE14	bolting_days	AM2018bHLH_OE	no	warm	23.8	21.5	4.61399	10	0.0107759	0.892189	NA	NA	NA	NA		OE14	bolting_days	BP2018bHLH_mutOE	no	warm	24.6	24	2.22967	15	0.00242357	1	NA	NA	NA	NA
		OE15	bolting_days	AM2018bHLH_OE	no	warm	26.7143	28	8.36091	7	0.510802	0.726334	NA	NA	NA	NA		OE15	bolting_days	BP2018bHLH_mutOE	no	warm	21.6667	21	0.866025	9	0.00520636	0.00109605	NA	NA	NA	NA
		Col-0	bolting_leaves	AM2018bHLH_OE	no	warm	15.875	15.5	1.3562	8	0.512375	1	NA	NA	NA	NA		Col-0	bolting_days	BP2018bHLH_mutOE	see above
		OE04	bolting_leaves	AM2018bHLH_OE	no	warm	16.4286	17	1.13389	7	0.261604	0.434138	NA	NA	NA	NA		OE04	bolting_leaves	BP2018bHLH_mutOE	no	warm	16.4667	16	0.99043	15	0.0287477	0.85732	NA	NA	NA	NA
		OE05	bolting_leaves	AM2018bHLH_OE	no	warm	16.7273	16	1.55505	11	0.0904286	0.253411	NA	NA	NA	NA		OE05	bolting_leaves	BP2018bHLH_mutOE	no	warm	18.5	18.5	2.12132	2	NA	NA	NA	NA	NA	NA
		OE06	bolting_leaves	AM2018bHLH_OE	no	warm	16.6	17	1.57762	10	0.709026	0.339115	NA	NA	NA	NA		OE06	bolting_leaves	BP2018bHLH_mutOE	no	warm	15.6154	16	0.869718	13	0.11056	0.261305	NA	NA	NA	NA
		OE07	bolting_leaves	AM2018bHLH_OE	no	warm	16.875	16.5	2.03101	8	0.925017	0.337356	NA	NA	NA	NA		OE07	bolting_leaves	BP2018bHLH_mutOE	no	warm	16.9	17	1.28668	10	0.391506	0.512558	NA	NA	NA	NA
		OE08	bolting_leaves	AM2018bHLH_OE	no	warm	17	17	1.18322	11	0.609485	0.0912389	NA	NA	NA	NA		OE08	bolting_leaves	BP2018bHLH_mutOE	no	warm	16.7	17	1.41814	10	0.0865715	0.719735	NA	NA	NA	NA
		OE09	bolting_leaves	AM2018bHLH_OE	no	warm	17.375	17	1.76777	8	0.0159125	0.084469	NA	NA	NA	NA		OE09	bolting_leaves	BP2018bHLH_mutOE	no	warm	16.8889	17	1.76383	9	0.0305438	0.461631	NA	NA	NA	NA
		OE10	bolting_leaves	AM2018bHLH_OE	no	warm	16.375	16.5	1.62788	16	0.168841	0.473495	NA	NA	NA	NA		OE10	bolting_leaves	BP2018bHLH_mutOE	no	warm	15.6364	15	1.28629	11	0.0252201	0.299739	NA	NA	NA	NA
		OE11	bolting_leaves	AM2018bHLH_OE	no	warm	17.4286	17	1.39859	14	0.0282484	0.0278376	NA	NA	NA	NA		OE11	bolting_leaves	BP2018bHLH_mutOE	no	warm	16	16	1.82574	13	0.364634	0.586788	NA	NA	NA	NA
		OE12	bolting_leaves	AM2018bHLH_OE	no	warm	17.5714	16	3.25869	7	0.166606	0.29018	NA	NA	NA	NA		OE12	bolting_leaves	BP2018bHLH_mutOE	no	warm	15.2222	16	1.56347	9	0.148946	0.169269	NA	NA	NA	NA
		OE13	bolting_leaves	AM2018bHLH_OE	no	warm	16.75	16.5	1.65831	12	0.662507	0.270514	NA	NA	NA	NA		OE13	bolting_leaves	BP2018bHLH_mutOE	no	warm	14.3	14	1.41814	10	0.249276	0.0096718	NA	NA	NA	NA
		OE14	bolting_leaves	AM2018bHLH_OE	no	warm	17.2	17.5	1.22927	10	0.389036	0.0561639	NA	NA	NA	NA		OE14	bolting_leaves	BP2018bHLH_mutOE	no	warm	15.0667	15	1.86956	15	0.473404	0.079969	NA	NA	NA	NA
		OE15	bolting_leaves	AM2018bHLH_OE	no	warm	16.8571	17	1.86445	7	0.318636	0.311034	NA	NA	NA	NA		OE15	bolting_leaves	BP2018bHLH_mutOE	no	warm	15	15	1.11803	9	0.0647581	0.0762876	NA	NA	NA	NA
		Col-0	leavesPERday	AM2018bHLH_OE	no	warm	0.7025	0.725	0.126801	8	0.688946	1	NA	NA	NA	NA		Col-0	bolting_days	BP2018bHLH_mutOE	see above
		OE04	leavesPERday	AM2018bHLH_OE	no	warm	0.787143	0.75	0.113095	7	0.24188	0.354109	NA	NA	NA	NA		OE04	leavesPERday	BP2018bHLH_mutOE	no	warm	0.694	0.7	0.0364104	15	0.177545	0.0654565	NA	NA	NA	NA
		OE05	leavesPERday	AM2018bHLH_OE	no	warm	0.8	0.8	0.104594	11	0.338612	0.147919	NA	NA	NA	NA		OE05	leavesPERday	BP2018bHLH_mutOE	no	warm	0.725	0.725	0.0212132	2	NA	NA	NA	NA	NA	NA
		OE06	leavesPERday	AM2018bHLH_OE	no	warm	0.704	0.72	0.0811309	10	0.238138	0.92898	NA	NA	NA	NA		OE06	leavesPERday	BP2018bHLH_mutOE	no	warm	0.673077	0.68	0.0614254	13	0.00538183	0.316119	NA	NA	NA	NA
		OE07	leavesPERday	AM2018bHLH_OE	no	warm	0.6775	0.66	0.147624	8	0.909965	0.598703	NA	NA	NA	NA		OE07	leavesPERday	BP2018bHLH_mutOE	no	warm	0.717	0.725	0.0312872	10	0.0625089	0.0111922	NA	NA	NA	NA
		OE08	leavesPERday	AM2018bHLH_OE	no	warm	0.733636	0.8	0.162621	11	0.0348601	0.481415	NA	NA	NA	NA		OE08	leavesPERday	BP2018bHLH_mutOE	no	warm	0.626	0.64	0.0713676	10	0.00173862	0.198634	NA	NA	NA	NA
		OE09	leavesPERday	AM2018bHLH_OE	no	warm	0.7675	0.745	0.078876	8	0.215267	0.399773	NA	NA	NA	NA		OE09	leavesPERday	BP2018bHLH_mutOE	no	warm	0.668889	0.68	0.0483333	9	0.211843	0.949281	NA	NA	NA	NA
		OE10	leavesPERday	AM2018bHLH_OE	no	warm	0.724375	0.75	0.100662	16	0.0650392	0.853925	NA	NA	NA	NA		OE10	leavesPERday	BP2018bHLH_mutOE	no	warm	0.648182	0.67	0.0526912	11	0.295879	0.60069	NA	NA	NA	NA
		OE11	leavesPERday	AM2018bHLH_OE	no	warm	0.805	0.81	0.102112	14	0.0433682	0.0593655	NA	NA	NA	NA		OE11	leavesPERday	BP2018bHLH_mutOE	no	warm	0.677692	0.68	0.0674727	13	0.604725	0.406015	NA	NA	NA	NA
		OE12	leavesPERday	AM2018bHLH_OE	no	warm	0.75	0.8	0.10924	7	0.202889	0.523707	NA	NA	NA	NA		OE12	leavesPERday	BP2018bHLH_mutOE	no	warm	0.645556	0.68	0.0911196	9	0.08336	1	NA	NA	NA	NA
		OE13	leavesPERday	AM2018bHLH_OE	no	warm	0.715	0.715	0.121693	12	0.388194	0.850631	NA	NA	NA	NA		OE13	leavesPERday	BP2018bHLH_mutOE	no	warm	0.627	0.625	0.0673383	10	0.372015	0.195039	NA	NA	NA	NA
		OE14	leavesPERday	AM2018bHLH_OE	no	warm	0.742	0.76	0.127871	10	0.25684	0.5045	NA	NA	NA	NA		OE14	leavesPERday	BP2018bHLH_mutOE	no	warm	0.616	0.63	0.0673795	15	0.575249	0.0461086	NA	NA	NA	NA
		OE15	leavesPERday	AM2018bHLH_OE	no	warm	0.677143	0.63	0.19847	7	0.617967	0.643132	NA	NA	NA	NA		OE15	leavesPERday	BP2018bHLH_mutOE	no	warm	0.693333	0.7	0.0507445	9	0.251063	0.193016	NA	NA	NA	NA
Additional TTG1 T-DNA-mutants		Col-0	bolting_days	BP2018ttg1_21_22	yes, see below	warm	19.7333	19	0.96115	15	0.00163942	1	NA	NA	NA	3.75074e-06		Col-0	bolting_days	BP2018ttg1_21_22	yes, see below	warm	21.1667	21	2.08167	12	0.464639	1	NA	NA	NA	1.38448e-05		Col-0	bolting_days	BP2018ttg1_21_22	yes, see below	warm	19.6	20	1.0556	15	0.0409487	1	NA	NA	NA	3.72499e-06
		ttg1-21	bolting_days	BP2018ttg1_21_22	yes, see below	warm	19	19	1.6641	14	0.0328317	0.315562	NA	NA	NA	0.000192782		ttg1-21	bolting_days	BP2018ttg1_21_22	yes, see below	warm	20	19	2.12132	13	0.00280449	0.109525	NA	NA	NA	0.000164854		ttg1-21	bolting_days	BP2018ttg1_21_22	yes, see below	warm	17.6154	18	1.7097	13	0.221105	0.00204659	NA	NA	NA	2.00409e-05
		ttg1-22	bolting_days	BP2018ttg1_21_22	yes, see below	warm	17.7143	17	1.5898	14	0.0241108	0.00101723	NA	NA	NA	4.11963e-05		ttg1-22	bolting_days	BP2018ttg1_21_22	yes, see below	warm	18.6	19	1.50238	15	0.14198	0.00400273	NA	NA	NA	1.76062e-05		ttg1-22	bolting_days	BP2018ttg1_21_22	yes, see below	warm	16.9231	16	1.25576	13	0.00246683	8.4491e-05	NA	NA	NA	8.37918e-06
		Col-0	bolting_leaves	BP2018ttg1_21_22	yes, see below	warm	16.1333	16	1.35576	15	0.144299	1	NA	NA	NA	0.000301824		Col-0	bolting_leaves	BP2018ttg1_21_22	yes, see below	warm	16.5	17	1.50756	12	0.0473412	1	NA	NA	NA	0.000607877		Col-0	bolting_leaves	BP2018ttg1_21_22	yes, see below	warm	16.6	17	1.18322	15	0.0861909	1	NA	NA	NA	9.3246e-06
		ttg1-21	bolting_leaves	BP2018ttg1_21_22	yes, see below	warm	15.2143	16	2.08211	14	0.165333	0.285383	NA	NA	NA	0.53551		ttg1-21	bolting_leaves	BP2018ttg1_21_22	yes, see below	warm	14.8462	15	1.40512	13	0.195067	0.0140619	NA	NA	NA	0.0151901		ttg1-21	bolting_leaves	BP2018ttg1_21_22	yes, see below	warm	14.7692	15	1.83275	13	0.0268248	0.00465862	NA	NA	NA	0.67216
		ttg1-22	bolting_leaves	BP2018ttg1_21_22	yes, see below	warm	13.5	13.5	1.22474	14	0.0218067	0.000104042	NA	NA	NA	0.56437		ttg1-22	bolting_leaves	BP2018ttg1_21_22	yes, see below	warm	13.2667	13	0.883715	15	0.0017828	3.5606e-05	NA	NA	NA	0.0189149		ttg1-22	bolting_leaves	BP2018ttg1_21_22	yes, see below	warm	13.3846	13	0.869718	13	0.11056	1.41129e-05	NA	NA	NA	1.95811e-05
		Col-0	leavesPERday	BP2018ttg1_21_22	yes, see below	warm	0.816667	0.81	0.0492322	15	0.369823	1	NA	NA	NA	0.0480875		Col-0	leavesPERday	BP2018ttg1_21_22	yes, see below	warm	0.783333	0.795	0.0655513	12	0.884028	1	NA	NA	NA	0.00761426		Col-0	leavesPERday	BP2018ttg1_21_22	yes, see below	warm	0.848	0.85	0.0627011	15	0.438467	1	NA	NA	NA	0.000592738
		ttg1-21	leavesPERday	BP2018ttg1_21_22	yes, see below	warm	0.797857	0.805	0.0549375	14	0.157194	0.4825	NA	NA	NA	0.00712989		ttg1-21	leavesPERday	BP2018ttg1_21_22	yes, see below	warm	0.746923	0.75	0.0875009	13	0.99917	0.300549	NA	NA	NA	0.0467021		ttg1-21	leavesPERday	BP2018ttg1_21_22	yes, see below	warm	0.839231	0.85	0.0796306	13	0.351417	0.578744	NA	NA	NA	2.7426e-05
		ttg1-22	leavesPERday	BP2018ttg1_21_22	yes, see below	warm	0.763571	0.755	0.055968	14	0.832918	0.0200785	NA	NA	NA	0.000755087		ttg1-22	leavesPERday	BP2018ttg1_21_22	yes, see below	warm	0.715333	0.72	0.0504079	15	0.147116	0.00748466	NA	NA	NA	0.000218631		ttg1-22	leavesPERday	BP2018ttg1_21_22	yes, see below	warm	0.792308	0.81	0.0555509	13	0.67114	0.0143449	NA	NA	NA	0.144037
		Col-0	bolting_days	BP2018ttg1_21_22	yes, see above	cold	24.6	24	1.95667	15	0.321114	1	NA	NA	NA	3.75074e-06		Col-0	bolting_days	BP2018ttg1_21_22	yes, see above	cold	27.4667	27	1.80739	15	0.0439704	1	NA	NA	NA	1.38448e-05		Col-0	bolting_days	BP2018ttg1_21_22	yes, see above	cold	26.6429	27	1.33631	14	0.0142111	1	NA	NA	NA	3.72499e-06
		ttg1-21	bolting_days	BP2018ttg1_21_22	yes, see above	cold	21.8667	21	2.2318	15	0.000233203	0.000477324	NA	NA	NA	0.000192782		ttg1-21	bolting_days	BP2018ttg1_21_22	yes, see above	cold	24	25	1.64751	15	0.0595693	4.9379e-05	NA	NA	NA	0.000164854		ttg1-21	bolting_days	BP2018ttg1_21_22	yes, see above	cold	21.6923	21	1.49358	13	0.0291649	8.48702e-06	NA	NA	NA	2.00409e-05
		ttg1-22	bolting_days	BP2018ttg1_21_22	yes, see above	cold	20.4286	20	0.937614	14	1.24606e-05	6.57366e-06	NA	NA	NA	4.11963e-05		ttg1-22	bolting_days	BP2018ttg1_21_22	yes, see above	cold	23.25	23	1.65831	12	0.075686	7.18638e-05	NA	NA	NA	1.76062e-05		ttg1-22	bolting_days	BP2018ttg1_21_22	yes, see above	cold	23.5714	24	2.06488	14	0.0160282	0.000109389	NA	NA	NA	8.37918e-06
		Col-0	bolting_leaves	BP2018ttg1_21_22	yes, see above	cold	18.9333	19	2.05171	15	0.0382131	1	NA	NA	NA	0.000301824		Col-0	bolting_leaves	BP2018ttg1_21_22	yes, see above	cold	19.8	19	2.33605	15	0.395042	1	NA	NA	NA	0.000607877		Col-0	bolting_leaves	BP2018ttg1_21_22	yes, see above	cold	20.2143	20	1.3688	14	0.190131	1	NA	NA	NA	9.3246e-06
		ttg1-21	bolting_leaves	BP2018ttg1_21_22	yes, see above	cold	15.8667	16	1.50555	15	0.246218	0.00017898	NA	NA	NA	0.53551		ttg1-21	bolting_leaves	BP2018ttg1_21_22	yes, see above	cold	16.4	17	1.68184	15	0.0567119	0.000362574	NA	NA	NA	0.0151901		ttg1-21	bolting_leaves	BP2018ttg1_21_22	yes, see above	cold	14.6154	15	1.19293	13	0.105361	9.68235e-06	NA	NA	NA	0.67216
		ttg1-22	bolting_leaves	BP2018ttg1_21_22	yes, see above	cold	13.7857	14	0.801784	14	0.0220878	3.39038e-06	NA	NA	NA	0.56437		ttg1-22	bolting_leaves	BP2018ttg1_21_22	yes, see above	cold	14.3333	14	1.07309	12	0.123178	1.69373e-05	NA	NA	NA	0.0189149		ttg1-22	bolting_leaves	BP2018ttg1_21_22	yes, see above	cold	17.7857	18	1.67233	14	0.334755	0.000730822	NA	NA	NA	1.95811e-05
		Col-0	leavesPERday	BP2018ttg1_21_22	yes, see above	cold	0.77	0.76	0.0625643	15	0.620512	1	NA	NA	NA	0.0480875		Col-0	leavesPERday	BP2018ttg1_21_22	yes, see above	cold	0.718667	0.72	0.0519432	15	0.665075	1	NA	NA	NA	0.00761426		Col-0	leavesPERday	BP2018ttg1_21_22	yes, see above	cold	0.758571	0.75	0.04538	14	0.80944	1	NA	NA	NA	0.000592738
		ttg1-21	leavesPERday	BP2018ttg1_21_22	yes, see above	cold	0.728667	0.71	0.0673866	15	0.492124	0.134077	NA	NA	NA	0.00712989		ttg1-21	leavesPERday	BP2018ttg1_21_22	yes, see above	cold	0.684	0.67	0.0658787	15	0.0531627	0.235534	NA	NA	NA	0.0467021		ttg1-21	leavesPERday	BP2018ttg1_21_22	yes, see above	cold	0.674615	0.67	0.0375534	13	0.698028	8.87186e-05	NA	NA	NA	2.7426e-05
		ttg1-22	leavesPERday	BP2018ttg1_21_22	yes, see above	cold	0.677143	0.7	0.0552517	14	0.0494901	0.000567944	NA	NA	NA	0.000755087		ttg1-22	leavesPERday	BP2018ttg1_21_22	yes, see above	cold	0.618333	0.615	0.0406388	12	0.699622	0.000179683	NA	NA	NA	0.000218631		ttg1-22	leavesPERday	BP2018ttg1_21_22	yes, see above	cold	0.755714	0.76	0.0557072	14	0.320951	1	NA	NA	NA	0.144037
