# Supplementary material for: TRANSPARENT TESTA GLABRA 1 participates in flowering time regulation in Arabidopsis thaliana
Source: PeerJ. 2020 Jan 20;8:e8303. doi: 10.7717/peerj.8303 (PMC6977477; doi:10.7717/peerj.8303)
Supplement: Table S3 [file peerj-08-8303-s013.xlsx]

## Sheet: Legend
Description for Table S3
header	description
genotype	Refer to the methods section and Table S7 for informations on the used overexpression lines, mutants and respective backgrounds.
target	Primerpairs for each target are provided in Table S8.
meanDCt_rep1-3	mean of DCt values for 2-3 technical replicates for each biological replicate, meanDCt=mean(Cttarget)-mean(CtUBQ)
SDDCt_rep1-3	SD of the respective mean, SDDCt=((SD(Cttarget))² + (SD(CtUBQ10))²)^(1/2)
meanDCt	mean of DCt values for 3 biological replicates
SDDCt	SD for 3 biological replicates
n	As samples with extreme values (like high SD or less than two Ct values) were excluded, n was <3 in one case.
P_ShapiroWilk	Please note: with n=3 assumptions on the distribution are at their limit. Therefore and due to the experimental setup, we provide the Shapiro-Wilk (conducted in R) test results for the interested reader but use the robust Welch test (two-sided) for the statistic analysis in R (which requires the assumption of an underlying normal distribution).
P_Welch(relative to Col-0)	Result from Welch-test (two-sided) conducted in R. The respective genotype is compared to Col-0.
P_Welch(relative to cop1-4)	Result from Welch-test (two-sided) conducted in R. The respective genotype is compared to cop1-4.
2^(-DDCt)	Fold difference using DDCt=mean(DCtgenotype)-mean(DCtCol-0)) for each target and within each set of genotypes
SD_upper	2^(-x) - 2^(-DDCt), with x = DDCt - SD(DCtgenotype)
SD_lower	2^(-DDCt) + 2^(-x), with x = DDCt + SD(DCtgenotype)
threshold_per_target_and_genotype_set	Analog to 2^(-DDCt) using Ct=35 instead of Cttarget, the mean(35-mean(CtUBQ10)per target, all reps, all genos within one genotypeset of one subfigure) is used instead of mean(DCtgenotype) and the threshold is determined, normalized to the respective Col-0 value and displayed as a dashed line. In analogy, SD_upper is determined and the threshold + SD_upper is plottes as a dotted line to provide a …
SD(threshold)_upper	analog to SD_upper
bold and black: P < 0.1 or n=2 (number of biological replicates does not allow for Shapiro-Wilk test)
bold and red: P < 0.05
italic and red: P < 0.1

## Sheet: SuppTable_DataStatsqPCR
Supplementary Table S3. Results of qRT-PCR experiments for circadian TTG1, CO, FT, SOC1 transcript levels in overexpression lines and statistics.
		mean & SD (DCts from technical replicates relative to UBQ10)						mean, SD and statistics (DCts from biological replicates)						fold difference using DDCts normalized to the respective value for Col-0 and threshold using Ct=35 (threshold per target and genotype)
genotype	target	meanDCt_rep1	SDDCt_rep1	meanDCt_rep2	SDDCt_rep2	meanDCt_rep3	SDDCt_rep3	meanDCt	SDDCt	n	P_ShapiroWilk	P_Welch(relative to Col-0)	P_Welch(relative to cop1-4)	2^(-DDCt)	SD_upper	SD_lower	threshold_per_target_and_genotype_set	SD(threshold)_upper
Col-0	TTG1 endo	3.5315	0.12303	4.58967	0.065714	4.36117	0.0381947	4.16078	0.556818	3	0.394675	1	0.193324	1	0.471021	0.3202	0.000300635	0.000251675
OE01	TTG1 endo	4.45533	0.0671441	4.23567	0.136608	4.25533	0.113616	4.31544	0.121546	3	0.154681	0.681014	0.0372076	0.89834	0.0789639	0.0725838	0.000300635	0.000251675
OE02	TTG1 endo	4.008	0.167492	4.26867	0.115691	4.18867	0.0663275	4.15511	0.133534	3	0.581019	0.987737	0.0613989	1.00394	0.097359	0.0887521	0.000300635	0.000251675
OE03	TTG1 endo	4.18733	0.102924	4.18767	0.0991127	3.809	0.102814	4.06133	0.218527	3	0.00145662	0.794763	0.0886489	1.07136	0.175216	0.150588	0.000300635	0.000251675
cop1-4	TTG1 endo	3.911	0.07949	3.38767	0.117517	3.36017	0.139337	3.55294	0.31039	3	0.0846328	0.193324	1	1.52397	0.365818	0.295004	0.000300635	0.000251675
OE19	TTG1 endo	4.71667	0.0846896	4.88733	0.127662	5.13933	0.13738	4.91444	0.212634	3	0.788683	0.131079	0.00493469	0.593094	0.0941843	0.0812773	0.000300635	0.000251675
OE20	TTG1 endo	4.28467	0.0871875	3.579	0.12151	3.44033	0.0581492	3.768	0.452786	3	0.293604	0.398913	0.53918	1.31292	0.484048	0.35366	0.000300635	0.000251675
OE21	TTG1 endo	4.33867	0.120902	4.533	0.102013	3.70033	0.0587424	4.19067	0.435616	3	0.429619	0.945334	0.115252	0.979496	0.345261	0.255278	0.000300635	0.000251675
Col-0	TTG1 both	4.662	0.0759934	5.63533	0.0335361	5.35633	0.0549242	5.21789	0.501218	3	0.538669	1	0.0364986	1	0.415408	0.29349	0.000625549	0.000523675
OE01	TTG1 both	-4.04533	0.066883	-4.28	0.205209	-4.455	0.0923724	-4.26011	0.205556	3	0.839778	0.00019009	0.00200021	713.119	109.201	94.6992	0.000625549	0.000523675
OE02	TTG1 both	-2.912	0.0813798	-3.09067	0.0410163	-3.35167	0.0296086	-3.11811	0.221114	3	0.794312	0.000217924	0.00267919	323.137	53.5223	45.9169	0.000625549	0.000523675
OE03	TTG1 both	-2.576	0.0514198	-2.86567	0.0628623	-3.505	0.10571	-2.98222	0.475341	3	0.591324	3.37774e-05	0.000720089	294.089	114.767	82.5519	0.000625549	0.000523675
cop1-4	TTG1 both	3.22367	0.0745542	4.29567	0.072968	2.7865	0.123481	3.43528	0.776518	3	0.544975	0.0364986	1	3.44048	2.45304	1.43202	0.000625549	0.000523675
OE19	TTG1 both	-0.297333	0.0392088	-0.0473333	0.117768	-0.0663333	0.0554196	-0.137	0.139177	3	0.130465	0.00160159	0.0132382	40.9244	4.1447	3.76354	0.000625549	0.000523675
OE20	TTG1 both	-2.39567	0.0429922	-3.11833	0.0713349	-3.57467	0.0643532	-3.02956	0.594493	3	0.75231	6.34127e-05	0.000474456	303.898	154.97	102.633	0.000625549	0.000523675
OE21	TTG1 both	1.21267	0.0914513	2.032	0.14515	1.99567	0.0411501	1.74678	0.46291	3	0.0749706	0.00094159	0.0426439	11.0894	4.19534	3.04381	0.000625549	0.000523675
Col-0	TTG1 no LWD	NA	NA	5.59433	0.0478609	5.22067	0.04389	5.4075	0.264222	2	NA	1	0.0264592	1	0.200988	0.167353	0.000719489	0.000618562
OE01	TTG1 no LWD	-4.11967	0.0797642	-4.465	0.126019	-4.71833	0.0691616	-4.43433	0.300509	3	0.830992	0.000143123	0.00100868	917.671	212.513	172.554	0.000719489	0.000618562
OE02	TTG1 no LWD	-2.95933	0.105322	-3.28267	0.0566951	-3.498	0.0483184	-3.24667	0.271132	3	0.779902	0.000312716	0.00185318	402.869	83.2948	69.0239	0.000719489	0.000618562
OE03	TTG1 no LWD	-2.66567	0.058046	-3.12767	0.0949877	-3.70917	0.0911747	-3.1675	0.522889	3	0.873909	0.000171343	0.000492409	381.357	166.588	115.942	0.000719489	0.000618562
cop1-4	TTG1 no LWD	3.125	0.0832326	4.07667	0.0929319	2.594	0.124278	3.26522	0.751214	3	0.689905	0.0264592	1	4.41458	3.01608	1.79186	0.000719489	0.000618562
OE19	TTG1 no LWD	-0.488667	0.052653	-0.319667	0.106933	-0.263333	0.0699023	-0.357222	0.117267	3	0.463263	0.00955118	0.0124569	54.3694	4.6039	4.24449	0.000719489	0.000618562
OE20	TTG1 no LWD	-2.53667	0.0597272	-3.333	0.0783496	-3.686	0.0678454	-3.18522	0.588745	3	0.5815	0.000269759	0.000413778	386.071	194.556	129.364	0.000719489	0.000618562
OE21	TTG1 no LWD	1.066	0.0910988	1.748	0.0243858	1.87667	0.0554467	1.56356	0.435672	3	0.283054	0.00117903	0.0385145	14.3596	5.06234	3.74284	0.000719489	0.000618562
Col-0	FT	7.93267	0.170354	7.95633	0.204375	7.166	0.11536	7.685	0.449623	3	0.0502701	1	0.170551	1	0.365683	0.267766	0.00803052	0.00604235
OE01	FT	13.0278	0.209807	11.1343	0.0820569	9.94167	0.0503157	11.3679	1.55629	3	0.751019	0.045567	0.066121	0.0778616	0.151127	0.0513867	0.00803052	0.00604235
OE02	FT	12.4573	0.173203	11.1497	0.143299	9.60333	0.194796	11.0701	1.42866	3	0.907861	0.0441547	0.0669844	0.095715	0.161947	0.0601593	0.00803052	0.00604235
OE03	FT	12.2198	0.0374544	11.017	0.132966	9.80833	0.0617279	11.0151	1.20575	3	0.997333	0.0290905	0.0459342	0.0994382	0.129923	0.0563274	0.00803052	0.00604235
cop1-4	FT	8.76233	0.0534634	8.34667	0.155156	7.82533	0.0522717	8.31144	0.469492	3	0.875827	0.170551	1	0.647771	0.249147	0.179939	0.00803052	0.00604235
OE19	FT	9.36467	0.171317	7.73433	0.0649025	7.77867	0.0667857	8.29256	0.92874	3	0.0455878	0.385487	0.97692	0.656308	0.593048	0.311538	0.00803052	0.00604235
OE20	FT	10.8307	0.108758	9.54183	0.0946617	9.86533	0.153674	10.0793	0.670524	3	0.465304	0.00971726	0.0244869	0.190218	0.112542	0.0707079	0.00803052	0.00604235
OE21	FT	8.979	0.117672	8.876	0.0846503	8.63133	0.0712273	8.82878	0.178579	3	0.558715	0.0340732	0.187723	0.452573	0.0596349	0.0526918	0.00803052	0.00604235
Col-0	CO	6.496	0.164072	7.18267	0.228402	6.654	0.187008	6.77756	0.359621	3	0.423	1	0.0226617	1	0.283089	0.220631	0.0042813	0.00322135
OE01	CO	7.46733	0.0919039	7.622	0.0335559	7.23483	0.0609084	7.44139	0.194883	3	0.779317	0.0651895	0.199665	0.631199	0.0912911	0.0797559	0.0042813	0.00322135
OE02	CO	7.92567	0.0926463	7.861	0.143981	7.21	0.162809	7.66556	0.395845	3	0.156175	0.0456918	0.687467	0.540363	0.1706	0.129663	0.0042813	0.00322135
OE03	CO	7.967	0.0581779	8.09967	0.140515	7	0.0874357	7.68889	0.600272	3	0.211482	0.101972	0.806389	0.531693	0.274355	0.180973	0.0042813	0.00322135
cop1-4	CO	8.128	0.106427	7.78067	0.140247	7.474	0.144045	7.79422	0.327211	3	0.931465	0.0226617	1	0.494257	0.125831	0.100297	0.0042813	0.00322135
OE19	CO	8.46733	0.0310698	7.442	0.182466	8.07433	0.0935076	7.99456	0.517301	3	0.744159	0.0341134	0.606289	0.430176	0.185524	0.129622	0.0042813	0.00322135
OE20	CO	8.621	0.0651281	8.09733	0.0806866	8.275	0.0505041	8.33111	0.266304	3	0.649537	0.00498438	0.0950136	0.340669	0.0690615	0.057421	0.0042813	0.00322135
OE21	CO	8.25867	0.160463	8.05667	0.147808	8.36833	0.047606	8.22789	0.158096	3	0.676461	0.0100714	0.134226	0.365937	0.0423806	0.0379818	0.0042813	0.00322135
Col-0	SOC1	3.229	0.169238	3.66267	0.165322	3.58733	0.15304	3.493	0.231713	3	0.311846	1	0.0365371	1	0.174228	0.148377	0.000439365	0.000330589
OE01	SOC1	4.31567	0.0915624	4.39667	0.0352184	4.174	0.048277	4.29544	0.112702	3	0.702017	0.0136647	0.480395	0.573377	0.0465878	0.0430869	0.000439365	0.000330589
OE02	SOC1	4.62233	0.0943575	4.06533	0.087854	4.15967	0.0910531	4.28244	0.298107	3	0.303454	0.0246966	0.611863	0.578567	0.132799	0.108008	0.000439365	0.000330589
OE03	SOC1	4.231	0.0528457	4.398	0.101946	3.905	0.0773305	4.178	0.250737	3	0.648403	0.0257179	0.912443	0.622006	0.118066	0.0992305	0.000439365	0.000330589
cop1-4	SOC1	3.95833	0.0551301	4.02533	0.0894725	4.474	0.0377227	4.15256	0.280387	3	0.228732	0.0365371	1	0.633073	0.135808	0.11182	0.000439365	0.000330589
OE19	SOC1	4.396	0.0503951	4.20833	0.0456216	3.79467	0.0721757	4.133	0.307663	3	0.591913	0.0492359	0.939088	0.641713	0.152536	0.123241	0.000439365	0.000330589
OE20	SOC1	5.68	0.0632824	5.04167	0.179102	4.177	0.0704888	4.96622	0.754335	3	0.83437	0.0665787	0.194449	0.360177	0.247389	0.146657	0.000439365	0.000330589
OE21	SOC1	4.65033	0.0301773	4.76833	0.0434588	3.85867	0.034448	4.42578	0.494664	3	0.228338	0.0639331	0.463396	0.523849	0.21425	0.152059	0.000439365	0.000330589
