# Supplementary material for: TRANSPARENT TESTA GLABRA 1 participates in flowering time regulation in Arabidopsis thaliana
Source: PeerJ. 2020 Jan 20;8:e8303. doi: 10.7717/peerj.8303 (PMC6977477; doi:10.7717/peerj.8303)
Supplement: Table S5 [file peerj-08-8303-s015.xlsx]

## Sheet: Legend
Description for Table S5
header	description
genotype	Refer to the methods section and Table S7 for informations on the used overexpression lines, mutants and respective backgrounds.
ZT	Timepoints on day eight after transfer of seeds from stratification into the plant chamber at which the samples were taken under LD conditions (ZT0-16: light, ZT16-0:dark)
target	Primerpairs for each target are provided in Table S8.
meanDCt_rep1-3	mean of DCt values for 2-3 technical replicates for each biological replicate, meanDCt=mean(Cttarget)-mean(CtUBQ)
SDDCt_rep1-3	SD of the respective mean, SDDCt=((SD(Cttarget))² + (SD(CtUBQ10))²)^(1/2)
meanDCt	mean of DCt values for 3 biological replicates
SDDCt	SD for 3 biological replicates
n	As samples with extreme values (like high SD or less than two Ct values) were excluded, n was <3 in few cases (29/634).
P_ShapiroWilk	Please note: with n=3 assumptions on the distribution are at their limit. Therefore and due to the experimental setup, we provide the Shapiro-Wilk (conducted in R) test results for the interested reader but use the robust Welch test (two-sided) for the statistic analysis in R (which requires the assumption of an underlying normal distribution).
P_Welch(relative to background)	Result from Welch-test (two-sided) conducted in R. The genotype is compared to its respective background within the respective experiment.
2^(-DDCt)	Fold difference using DDCt=mean(DCtgenotype)-mean(DCtx)) for each target and within each set of genotypes, with mean(DCtx) being the minimal mean within one set of genotypes of one experiment ((sub-)plot) per target.
SD_upper	2^(-x) - 2^(-DDCt), with x = DDCt - SD(DCtgenotype)
SD_lower	2^(-DDCt) + 2^(-x), with x = DDCt + SD(DCtgenotype)
threshold_per_target_and_genotype_set	Analog to 2^(-DDCt) using Ct=35 instead of Cttarget, the mean (35-mean(CtUBQ10)per target, all reps, all genos within one genotypeset of one subfigure) is used instead of mean(DCtgenotype) and the threshold is determined, normalized to the genotype with the maximal mean transcript level (min(mean(DCtx)) value. The respective 2^(-DDCt) value is displayed as a dashed line. In analogy, SD_upper is d…
SD(threshold)_upper	analog to SD_upper
bold and black: P < 0.1 or n=2 (number of biological replicates does not allow for Shapiro-Wilk test)
bold and red: P < 0.05
italic and red: P < 0.1

## Sheet: SuppTable_DataStatsqPCR
Supplementary Table S5. Results of circadian qRT-PCR experiments and statistics.
			mean & SD (DCts from technical replicates relative to UBQ10)						mean, SD and statistics (DCts from biological replicates)					fold difference using DDCts normalized to the maximal mean of respective DCts (2^(-DDCt)) and threshold using Ct=35 (threshold per target and genotype)
genotype	ZT	target	meanDCt_rep1	SDDCt_rep1	meanDCt_rep2	SDDCt_rep2	meanDCt_rep3	SDDCt_rep3	meanDCt	SDDCt	n	P_ShapiroWilk	P_Welch(relative to background)	2^(-DDCt)	SD_upper	SD_lower	threshold_per_target_and_genotype_set	SD(threshold)_upper
Col-0	0	AP2	6.08867	0.0853952	6.605	0.0830361	6.77333	0.0658761	6.489	0.356769	3	0.454849	1	0.595887	0.167179	0.130552	0.00183303	0.00153666
Col-0	4	AP2	6.18433	0.0611746	6.871	0.106508	7.93933	0.0752241	6.99822	0.88439	3	0.761449	1	0.418671	0.354189	0.19187	0.00183303	0.00153666
Col-0	8	AP2	6.69167	0.0901295	6.85	0.201081	6.902	0.0455851	6.81456	0.109555	3	0.457622	1	0.475513	0.0375157	0.0347723	0.00183303	0.00153666
Col-0	12	AP2	5.83967	0.0774123	6.37233	0.149904	7.34767	0.134851	6.51989	0.764752	3	0.679366	1	0.583265	0.407747	0.239982	0.00183303	0.00153666
Col-0	16	AP2	6.408	0.10905	6.296	0.114794	6.81467	0.0710258	6.50622	0.272928	3	0.394673	1	0.588816	0.122625	0.101489	0.00183303	0.00153666
Col-0	20	AP2	5.02767	0.112554	6.90833	0.0675524	5.29033	0.0753215	5.74211	1.01848	3	0.246964	1	1	1.02579	0.506364	0.00183303	0.00153666
Col-0	0	CO	6.718	0.197407	7.091	0.181162	9.931	0.18987	7.91333	1.75728	3	0.203076	1	0.360343	0.85783	0.253752	0.00275198	0.00351557
Col-0	4	CO	11.2207	0.0633903	8.778	0.260551	10.8717	0.325833	10.2901	1.3211	3	0.253006	1	0.0693801	0.103971	0.0416122	0.00275198	0.00351557
Col-0	8	CO	10.0247	0.182649	7.81067	0.21012	7.949	0.13028	8.59478	1.24025	3	0.106565	1	0.224689	0.306115	0.129578	0.00275198	0.00351557
Col-0	12	CO	7.39767	0.0757342	7.15567	0.193301	6.841	0.0617171	7.13144	0.279123	3	0.856332	1	0.619567	0.132251	0.108987	0.00275198	0.00351557
Col-0	16	CO	7.785	0.0752839	7.21367	0.159351	6.00067	0.143909	6.99978	0.911193	3	0.609026	1	0.678772	0.597727	0.317838	0.00275198	0.00351557
Col-0	20	CO	6.63833	0.0474728	6.978	0.121493	5.706	0.0472123	6.44078	0.65861	3	0.498116	1	1	0.578561	0.366512	0.00275198	0.00351557
Col-0	0	FT	9.373	0.206554	10.6872	0.219988	10.3263	0.155542	10.1288	0.67898	3	0.513653	1	0.0654332	0.0393258	0.0245632	0.002586	0.00328663
Col-0	4	FT	9.14433	0.0567744	10.8302	0.0649679	11.804	0.243026	10.5928	1.34562	3	0.707133	1	0.0474373	0.0731199	0.0287715	0.002586	0.00328663
Col-0	8	FT	10.7143	0.26422	10.0675	0.0760296	10.704	0.111583	10.4953	0.370502	3	0.0266339	1	0.050756	0.0148615	0.0114956	0.002586	0.00328663
Col-0	12	FT	7.92867	0.132003	5.754	0.107692	8.59867	0.157364	7.42711	1.48718	3	0.433936	1	0.425694	0.767698	0.273845	0.002586	0.00328663
Col-0	16	FT	6.40967	0.15131	5.87533	0.0760745	6.3	0.238484	6.195	0.282218	3	0.37345	1	1	0.216063	0.177674	0.002586	0.00328663
Col-0	20	FT	7.58133	0.0206559	8.59567	0.214431	6.899	0.0411663	7.692	0.85373	3	0.785145	1	0.354289	0.285971	0.158243	0.002586	0.00328663
Col-0	0	SMZ	7.24267	0.153774	7.77833	0.0974543	7.62167	0.141313	7.54756	0.275416	3	0.550802	1	0.515802	0.108495	0.0896402	0.00330481	0.00277048
Col-0	4	SMZ	6.491	0.0767898	7.89667	0.1227	8.87467	0.0943946	7.75411	1.19821	3	0.802869	1	0.446996	0.578658	0.252188	0.00330481	0.00277048
Col-0	8	SMZ	7.25767	0.20352	8.00467	0.0697041	7.688	0.0964002	7.65011	0.374939	3	0.832645	1	0.480408	0.142578	0.109947	0.00330481	0.00277048
Col-0	12	SMZ	5.61733	0.0717589	6.59067	0.0850568	7.98067	0.269226	6.72956	1.18777	3	0.806264	1	0.909338	1.16214	0.510157	0.00330481	0.00277048
Col-0	16	SMZ	6.00233	0.109391	6.51867	0.112457	7.25633	0.0682886	6.59244	0.630247	3	0.806048	1	1	0.54783	0.353934	0.00330481	0.00277048
Col-0	20	SMZ	6.914	0.131175	9.101	0.189505	7.36	0.0855141	7.79167	1.15564	3	0.370867	1	0.43551	0.53473	0.240023	0.00330481	0.00277048
Col-0	0	SNZ	4.892	0.133293	4.974	0.0558122	4.625	0.045218	4.83033	0.182489	3	0.432784	1	0.823337	0.111019	0.0978279	0.000802187	0.000672488
Col-0	4	SNZ	4.722	0.0868313	5.11733	0.0908809	5.154	0.0510065	4.99778	0.239533	3	0.146319	1	0.733115	0.132408	0.112152	0.000802187	0.000672488
Col-0	8	SNZ	4.49733	0.0891142	4.964	0.0637312	4.93167	0.0513939	4.79767	0.260598	3	0.118558	1	0.842193	0.166733	0.139179	0.000802187	0.000672488
Col-0	12	SNZ	4.34867	0.0094163	5.129	0.0604786	4.96467	0.0868025	4.81411	0.411376	3	0.384051	1	0.832648	0.274735	0.206575	0.000802187	0.000672488
Col-0	16	SNZ	4.68267	0.103259	5.23	0.0356745	4.86867	0.040653	4.92711	0.278308	3	0.65072	1	0.769919	0.163817	0.135076	0.000802187	0.000672488
Col-0	20	SNZ	6.805	0.0648691	6.58533	0.131329	6.37067	0.0655184	6.587	0.217171	3	0.987307	1	0.243651	0.0395817	0.0340502	0.000802187	0.000672488
Col-0	0	SOC1	3.97833	0.0352467	4.94733	0.0943115	4.57567	0.100361	4.50044	0.48886	3	0.744737	1	0.316317	0.127582	0.0909134	0.000288265	0.000289855
Col-0	4	SOC1	3.58167	0.113685	4.13	0.114153	3.34867	0.089159	3.68678	0.401132	3	0.562787	1	0.555982	0.178217	0.134957	0.000288265	0.000289855
Col-0	8	SOC1	3.18767	0.0262234	3.882	0.148282	3.195	0.175727	3.42156	0.398773	3	0.0175611	1	0.668191	0.212743	0.161366	0.000288265	0.000289855
Col-0	12	SOC1	3.12033	0.0737609	4.83967	0.0631295	3.111	0.0124365	3.69033	0.995363	3	0.00895423	1	0.554614	0.551054	0.276414	0.000288265	0.000289855
Col-0	16	SOC1	3.81567	0.0347467	4.943	0.157124	3.559	0.0379693	4.10589	0.736231	3	0.334619	1	0.415811	0.276854	0.166197	0.000288265	0.000289855
Col-0	20	SOC1	3.33	0.0409023	3.83933	0.0484424	3.99667	0.01823	3.722	0.348477	3	0.434888	1	0.542573	0.14824	0.116429	0.000288265	0.000289855
Col-0	0	SVP	5.35467	0.0935111	6.00667	0.0551574	5.63533	0.107548	5.66556	0.327049	3	0.846993	1	0.26933	0.0685295	0.0546293	0.000468175	0.00039248
Col-0	4	SVP	3.674	0.0591157	4.60333	0.0839246	5.08067	0.0870651	4.45267	0.715334	3	0.649669	1	0.62431	0.400722	0.244065	0.000468175	0.00039248
Col-0	8	SVP	3.68967	0.116346	4.238	0.0996728	3.96733	0.0765071	3.965	0.274174	3	0.985924	1	0.875391	0.183221	0.15151	0.000468175	0.00039248
Col-0	12	SVP	3.59467	0.00875595	5.13967	0.111614	4.667	0.0514458	4.46711	0.791658	3	0.578977	1	0.61809	0.451863	0.261032	0.000468175	0.00039248
Col-0	16	SVP	4.357	0.0913126	5.27767	0.137414	4.909	0.0674364	4.84789	0.463366	3	0.781386	1	0.474708	0.179798	0.130406	0.000468175	0.00039248
Col-0	20	SVP	4.68533	0.0582609	6.04333	0.0887149	5.06267	0.041336	5.26378	0.700982	3	0.520449	1	0.355821	0.222605	0.136936	0.000468175	0.00039248
Col-0	0	TEM1	6.584	0.0406284	7.03167	0.242253	8.06267	0.1279	7.22611	0.758268	3	0.572298	1	0.330207	0.228325	0.134987	0.0019426	0.00191834
Col-0	4	TEM1	8.19233	0.0962046	7.23467	0.0847073	9.11	0.0705809	8.179	0.937738	3	0.976482	1	0.170584	0.156174	0.0815306	0.0019426	0.00191834
Col-0	8	TEM1	7.81567	0.0184842	6.03133	0.119199	5.65	0.0531758	6.499	1.1561	3	0.316425	1	0.546599	0.671518	0.301327	0.0019426	0.00191834
Col-0	12	TEM1	6.749	0.0832807	8.32433	0.154534	4.98933	0.0343317	6.68756	1.66835	3	0.939074	1	0.479632	1.04488	0.328733	0.0019426	0.00191834
Col-0	16	TEM1	8.184	0.066053	8.39933	0.10821	5.85533	0.247033	7.47956	1.41073	3	0.145902	1	0.277008	0.459479	0.17282	0.0019426	0.00191834
Col-0	20	TEM1	5.51733	0.0477319	6.984	0.0620376	6.26867	0.0166333	6.25667	0.733407	3	0.972937	1	0.646575	0.428395	0.257672	0.0019426	0.00191834
Col-0	0	TEM2	3.20667	0.0720879	3.60033	0.0499867	5.45567	0.0621396	4.08756	1.20106	3	0.314412	1	0.425334	0.552543	0.240332	0.000284137	0.000280588
Col-0	4	TEM2	4.89633	0.189212	3.16967	0.0653019	4.86733	0.0874376	4.31111	0.988626	3	0.0280126	1	0.364278	0.358557	0.180697	0.000284137	0.000280588
Col-0	8	TEM2	4.24	0.018619	2.22933	0.0623886	2.09333	0.0641301	2.85422	1.20204	3	0.108099	1	1	1.30065	0.565341	0.000284137	0.000280588
Col-0	12	TEM2	5.16433	0.127486	5.856	0.106455	2.75567	0.0400042	4.592	1.62748	3	0.408956	1	0.299831	0.626566	0.20279	0.000284137	0.000280588
Col-0	16	TEM2	6.24433	0.199718	5.92067	0.0694022	3.54333	0.239774	5.23611	1.47489	3	0.209983	1	0.191858	0.341437	0.122835	0.000284137	0.000280588
Col-0	20	TEM2	3.26467	0.0772873	3.63533	0.0554647	3.78433	0.0575789	3.56144	0.267597	3	0.538832	1	0.612498	0.124828	0.103695	0.000284137	0.000280588
Col-0	0	TOE1	2.63933	0.27643	3.17367	0.0780342	2.319	0.0907616	2.71067	0.431776	3	0.725805	1	0.557054	0.194352	0.144083	0.000181349	0.000110657
Col-0	4	TOE1	2.28633	0.182938	2.58733	0.108371	2.37467	0.0868293	2.41611	0.154721	3	0.55288	1	0.683231	0.0773458	0.0694803	0.000181349	0.000110657
Col-0	8	TOE1	1.78333	0.14922	2.41633	0.0600555	1.58867	0.070259	1.92944	0.432746	3	0.433273	1	0.957345	0.33488	0.248096	0.000181349	0.000110657
Col-0	12	TOE1	2.015	0.130436	2.12133	0.0885739	2.406	0.0792191	2.18078	0.202164	3	0.508246	1	0.804284	0.120983	0.105164	0.000181349	0.000110657
Col-0	16	TOE1	2.02433	0.107123	2.17833	0.0401539	1.735	0.0727507	1.97922	0.225083	3	0.666821	1	0.924877	0.15616	0.133602	0.000181349	0.000110657
Col-0	20	TOE1	2.55267	0.162085	2.678	0.0533073	1.77767	0.0617765	2.33611	0.48767	3	0.246102	1	0.722187	0.290448	0.207141	0.000181349	0.000110657
Col-0	0	TOE2	4.53633	0.289331	4.074	0.0859748	4.05233	0.0833467	4.22089	0.273398	3	0.0756977	1	0.542698	0.113234	0.0936867	0.000503267	0.000307087
Col-0	4	TOE2	4.45933	0.15118	4.21333	0.112309	4.25233	0.0902404	4.30833	0.132216	3	0.282709	1	0.510781	0.0490226	0.0447296	0.000503267	0.000307087
Col-0	8	TOE2	3.71933	0.224294	3.52	0.0721711	2.87967	0.0716891	3.373	0.43871	3	0.437705	1	0.976784	0.347141	0.256119	0.000503267	0.000307087
Col-0	12	TOE2	3.31667	0.0923562	3.586	0.0239165	3.11467	0.020166	3.33911	0.236467	3	0.842833	1	1	0.178104	0.151178	0.000503267	0.000307087
Col-0	16	TOE2	4.082	0.0876242	3.64233	0.045873	3.10533	0.0998165	3.60989	0.489141	3	0.890232	1	0.828873	0.33454	0.238343	0.000503267	0.000307087
Col-0	20	TOE2	4.52167	0.132313	4.11833	0.106366	3.39967	0.0978894	4.01322	0.568337	3	0.69278	1	0.626718	0.302588	0.204063	0.000503267	0.000307087
Col-0	0	TOE3	7.594	0.366979	9.52267	0.178679	8.66867	0.0753149	8.59511	0.966435	3	0.874023	1	0.374909	0.357665	0.183042	0.00692196	0.0037246
Col-0	4	TOE3	6.31	0.144328	8.32767	0.109865	8.916	0.131149	7.85122	1.36677	3	0.414296	1	0.627854	0.991333	0.384398	0.00692196	0.0037246
Col-0	8	TOE3	6.47567	0.110695	8.12567	0.230931	7.23533	0.0830622	7.27889	0.825862	3	0.912739	1	0.933572	0.721272	0.406902	0.00692196	0.0037246
Col-0	12	TOE3	6.214	0.146464	7.838	0.192252	8.46483	0.262509	7.50561	1.16165	3	0.521753	1	0.797807	0.986988	0.441186	0.00692196	0.0037246
Col-0	16	TOE3	6.53967	0.124118	7.94033	0.177317	7.58833	0.0278628	7.35611	0.728637	3	0.465928	1	0.884915	0.581454	0.350892	0.00692196	0.0037246
Col-0	20	TOE3	7.42633	0.113742	10.085	0.301433	8.803	0.19145	8.77144	1.32961	3	0.960743	1	0.331775	0.502093	0.19977	0.00692196	0.0037246
ttg1-9	0	AP2	6.04667	0.0590141	6.40017	0.216312	7.345	0.187155	6.59728	0.671235	3	0.508906	0.820822	0.552801	0.327499	0.205659	0.00183303	0.00153666
ttg1-9	4	AP2	6.08667	0.082996	6.517	0.0950403	7.88633	0.180352	6.83	0.939775	3	0.441186	0.832475	0.470449	0.43198	0.225197	0.00183303	0.00153666
ttg1-9	8	AP2	6.03333	0.0702662	6.49	0.0745833	6.99667	0.0404145	6.50667	0.481883	3	0.942786	0.384259	0.588635	0.233432	0.167147	0.00183303	0.00153666
ttg1-9	12	AP2	5.58867	0.0684008	5.94267	0.100694	7.06633	0.221516	6.19922	0.771518	3	0.442093	0.636087	0.728443	0.515057	0.301721	0.00183303	0.00153666
ttg1-9	16	AP2	6.18567	0.109933	6.895	0.101183	7.573	0.0905907	6.88456	0.693726	3	0.975098	0.452909	0.452991	0.279702	0.172927	0.00183303	0.00153666
ttg1-9	20	AP2	4.63433	0.114662	6.13967	0.0768982	6.96467	0.0998716	5.91289	1.1816	3	0.68108	0.859033	0.888364	1.1267	0.496718	0.00183303	0.00153666
ttg1-9	0	CO	6.96933	0.0946696	6.662	0.147196	7.35533	0.136844	6.99556	0.34741	3	0.875069	0.462579	0.680762	0.185354	0.145687	0.00275198	0.00351557
ttg1-9	4	CO	11.1453	0.104865	9.121	0.186671	9.69967	0.0275379	9.98867	1.04265	3	0.53703	0.772668	0.0855025	0.0906336	0.0439967	0.00275198	0.00351557
ttg1-9	8	CO	9.10633	0.144237	7.4455	0.254773	8.997	0.14241	8.51628	0.928931	3	0.112458	0.934613	0.237253	0.214445	0.112637	0.00275198	0.00351557
ttg1-9	12	CO	6.972	0.0641457	6.405	0.170478	7.61333	0.160401	6.99678	0.604548	3	0.932196	0.750672	0.680185	0.354038	0.232843	0.00275198	0.00351557
ttg1-9	16	CO	7.438	0.100452	7.438	0.248042	8.037	0.111741	7.63767	0.345833	3	0	0.35173	0.436215	0.118164	0.0929776	0.00275198	0.00351557
ttg1-9	20	CO	5.66433	0.110428	5.96967	0.127115	7.72367	0.051316	6.45256	1.11135	3	0.26319	0.988321	0.991869	1.15104	0.532772	0.00275198	0.00351557
ttg1-9	0	FT	11.6693	0.215419	12.4893	0.136339	14.5308	0.179697	12.8965	1.47356	3	0.538501	0.064784	0.00960832	0.0170746	0.00614844	0.002586	0.00328663
ttg1-9	4	FT	11.1053	0.269794	11.9603	0.348765	13.0443	0.244009	12.0367	0.971751	3	0.869975	0.213199	0.0174375	0.0167612	0.00854633	0.002586	0.00328663
ttg1-9	8	FT	10.709	0.156505	11.1375	0.234694	11.2303	0.106176	11.0256	0.278094	3	0.320273	0.123914	0.0351432	0.00747116	0.00616132	0.002586	0.00328663
ttg1-9	12	FT	7.107	0.166297	7.14067	0.203515	7.02233	0.193944	7.09	0.0609708	3	0.534229	0.732591	0.537747	0.0232132	0.0222526	0.002586	0.00328663
ttg1-9	16	FT	6.51133	0.0986441	6.92267	0.115626	7.51	0.041227	6.98133	0.501911	3	0.80634	0.0947935	0.579816	0.241255	0.170367	0.002586	0.00328663
ttg1-9	20	FT	7.183	0.192286	8.80267	0.157077	10.769	0.23647	8.91822	1.79579	3	0.893514	0.367216	0.151436	0.374358	0.10782	0.002586	0.00328663
ttg1-9	0	SMZ	7.84767	0.0800167	7.5565	0.23832	8.74	0.227884	8.04806	0.616672	3	0.455174	0.296222	0.364601	0.194454	0.126818	0.00330481	0.00277048
ttg1-9	4	SMZ	7.792	0.133832	7.79467	0.122681	9.59467	0.211238	8.39378	1.04	3	0.00244854	0.524167	0.286909	0.303042	0.147378	0.00330481	0.00277048
ttg1-9	8	SMZ	7.91133	0.119412	8.33533	0.177557	9.35933	0.428379	8.53533	0.74443	3	0.551527	0.164572	0.260095	0.175645	0.104843	0.00330481	0.00277048
ttg1-9	12	SMZ	5.762	0.10294	6.572	0.168198	8.029	0.161545	6.78767	1.14878	3	0.688105	0.954355	0.873438	1.06321	0.479513	0.00330481	0.00277048
ttg1-9	16	SMZ	6.55967	0.0843287	8.01633	0.080699	7.96767	0.114788	7.51456	0.827316	3	0.0561816	0.204331	0.527736	0.408669	0.230316	0.00330481	0.00277048
ttg1-9	20	SMZ	7.23967	0.136663	8.40667	0.191176	9.767	0.231398	8.47111	1.2649	3	0.915705	0.530201	0.271935	0.381553	0.158775	0.00330481	0.00277048
ttg1-9	0	SNZ	5.32767	0.0688234	4.36683	0.183899	4.582	0.171348	4.75883	0.504235	3	0.410644	0.834833	0.86517	0.361962	0.255196	0.000802187	0.000672488
ttg1-9	4	SNZ	4.85133	0.0845774	4.12367	0.089937	4.67467	0.138323	4.54989	0.379542	3	0.448609	0.172072	1	0.300928	0.231318	0.000802187	0.000672488
ttg1-9	8	SNZ	4.56033	0.0703941	4.285	0.0820163	4.95367	0.0384361	4.59967	0.336064	3	0.806082	0.467823	0.966085	0.253412	0.200753	0.000802187	0.000672488
ttg1-9	12	SNZ	4.47267	0.0416253	4.48733	0.0947664	4.91333	0.0655083	4.62444	0.250293	3	0.0559651	0.539905	0.949635	0.179907	0.151252	0.000802187	0.000672488
ttg1-9	16	SNZ	5.14833	0.076729	5.09467	0.150736	4.787	0.0569181	5.01	0.194979	3	0.263675	0.696774	0.72693	0.105192	0.0918944	0.000802187	0.000672488
ttg1-9	20	SNZ	6.92633	0.13055	7.16767	0.106786	7.22467	0.0706706	7.10622	0.158374	3	0.345569	0.0328355	0.170007	0.0197257	0.0176749	0.000802187	0.000672488
ttg1-9	0	SOC1	4.99267	0.0875823	4.70067	0.0569327	4.156	0.117026	4.61644	0.424644	3	0.67032	0.772131	0.291879	0.0998933	0.0744227	0.000288265	0.000289855
ttg1-9	4	SOC1	3.44767	0.0701237	3.11367	0.138825	3.11167	0.0426927	3.22433	0.193415	3	0.00987446	0.173654	0.766074	0.109906	0.0961168	0.000288265	0.000289855
ttg1-9	8	SOC1	2.82067	0.0901036	3	0.0373363	2.699	0.0942797	2.83989	0.151418	3	0.789604	0.113922	1	0.11066	0.0996348	0.000288265	0.000289855
ttg1-9	12	SOC1	3.77567	0.0306812	3.887	0.0218632	3.239	0.0336403	3.63389	0.346485	3	0.308176	0.933068	0.576743	0.156562	0.123136	0.000288265	0.000289855
ttg1-9	16	SOC1	4.38933	0.0776187	4.80833	0.0654472	2.99	0.0585036	4.06256	0.952193	3	0.42367	0.953449	0.42849	0.400557	0.207027	0.000288265	0.000289855
ttg1-9	20	SOC1	3.03733	0.0665633	3.95833	0.0417692	2.94433	0.0587679	3.31333	0.560519	3	0.158622	0.354718	0.720243	0.341971	0.231876	0.000288265	0.000289855
ttg1-9	0	SVP	4.92433	0.0656455	5.3445	0.197082	5.729	0.170162	5.33261	0.402465	3	0.951136	0.330875	0.339243	0.109156	0.0825837	0.000468175	0.00039248
ttg1-9	4	SVP	3.59467	0.112478	3.603	0.0897032	4.553	0.12738	3.91689	0.550904	3	0.014445	0.365629	0.905076	0.420864	0.287278	0.000468175	0.00039248
ttg1-9	8	SVP	3.48433	0.085594	3.82133	0.0664781	4.01333	0.107521	3.773	0.267792	3	0.700245	0.434534	1	0.203963	0.16941	0.000468175	0.00039248
ttg1-9	12	SVP	3.57233	0.0476795	4.02767	0.164284	4.60267	0.0490578	4.06756	0.516324	3	0.872125	0.510761	0.815323	0.350838	0.245289	0.000468175	0.00039248
ttg1-9	16	SVP	4.43767	0.0732553	5.262	0.0870115	5.176	0.0474517	4.95856	0.453148	3	0.181503	0.782145	0.439655	0.162243	0.11851	0.000468175	0.00039248
ttg1-9	20	SVP	3.98667	0.0899315	5.31033	0.0737609	5.89733	0.0400042	5.06478	0.978716	3	0.581685	0.790247	0.408447	0.396484	0.201188	0.000468175	0.00039248
ttg1-9	0	TEM1	6.988	0.0534571	8.08633	0.16436	9.17167	0.164106	8.082	1.09184	3	0.993436	0.334245	0.182448	0.206432	0.0968501	0.0019426	0.00191834
ttg1-9	4	TEM1	7.53767	0.116393	7.61667	0.188741	9.04133	0.0901406	8.06522	0.846259	3	0.089177	0.883653	0.184582	0.147266	0.0819128	0.0019426	0.00191834
ttg1-9	8	TEM1	7.37567	0.0626631	6.7355	0.191918	6.17867	0.148821	6.76328	0.598983	3	0.923276	0.748404	0.455107	0.23422	0.154637	0.0019426	0.00191834
ttg1-9	12	TEM1	7.019	0.0587197	5.638	0.122697	5.95533	0.121397	6.20411	0.723331	3	0.422373	0.679383	0.670563	0.43653	0.264405	0.0019426	0.00191834
ttg1-9	16	TEM1	7.333	0.0822111	9.432	0.235763	5.758	0.151683	7.50767	1.84322	3	0.843089	0.984334	0.271663	0.703089	0.19595	0.0019426	0.00191834
ttg1-9	20	TEM1	5.367	0.157203	6.494	0.0584608	7.332	0.0886115	6.39767	0.986036	3	0.838216	0.852923	0.586372	0.575076	0.290335	0.0019426	0.00191834
ttg1-9	0	TEM2	6.058	0.0577985	6.048	0.14325	7.98267	0.187616	6.69622	1.1141	3	0.0085713	0.0512677	0.0697337	0.0812123	0.0375183	0.000284137	0.000280588
ttg1-9	4	TEM2	7.074	0.149354	4.91833	0.200582	6.63067	0.117999	6.20767	1.13839	3	0.374279	0.0962206	0.0978391	0.117539	0.053394	0.000284137	0.000280588
ttg1-9	8	TEM2	7.793	0.108285	4.89683	0.202566	3.87633	0.150693	5.52206	2.03181	3	0.484815	0.138205	0.157363	0.486121	0.11888	0.000284137	0.000280588
ttg1-9	12	TEM2	7.50167	0.042265	5.34267	0.110686	6.168	0.116304	6.33744	1.08943	3	0.741963	0.207626	0.0894223	0.100859	0.0473985	0.000284137	0.000280588
ttg1-9	16	TEM2	7.752	0.0917315	8.03467	0.162712	5.396	0.0841289	7.06089	1.44875	3	0.186614	0.201071	0.0541586	0.0936785	0.0343181	0.000284137	0.000280588
ttg1-9	20	TEM2	4.68867	0.0861123	4.73567	0.0830321	6.34633	0.0973927	5.25689	0.943779	3	0.0475602	0.0799958	0.189115	0.174659	0.0907998	0.000284137	0.000280588
ttg1-9	0	TOE1	2.64067	0.0925239	2.953	0.0900056	2.323	0.0896158	2.63889	0.315004	3	0.990665	0.828488	0.58547	0.142863	0.114841	0.000181349	0.000110657
ttg1-9	4	TOE1	2.69067	0.176701	2.03967	0.15291	1.99567	0.0815271	2.242	0.389179	3	0.10802	0.530403	0.770868	0.238698	0.182261	0.000181349	0.000110657
ttg1-9	8	TOE1	2.11467	0.239501	1.77667	0.022745	1.70833	0.0782326	1.86656	0.21757	3	0.301166	0.83674	1	0.162773	0.139987	0.000181349	0.000110657
ttg1-9	12	TOE1	2.19233	0.343654	2.06067	0.0421584	2.053	0.0696683	2.102	0.0783248	3	0.0935087	0.58025	0.849423	0.0473905	0.0448862	0.000181349	0.000110657
ttg1-9	16	TOE1	1.87767	0.147205	2.352	0.0874757	1.66233	0.0655846	1.964	0.352846	3	0.592216	0.953297	0.934687	0.258981	0.202792	0.000181349	0.000110657
ttg1-9	20	TOE1	2.28367	0.220561	2.63267	0.0796074	2.45867	0.0912268	2.45833	0.1745	3	0.996841	0.715128	0.663525	0.0853116	0.0755925	0.000181349	0.000110657
ttg1-9	0	TOE2	4.80133	0.096215	4.27	0.104623	3.95567	0.0811932	4.34233	0.427448	3	0.719099	0.703245	0.498885	0.172042	0.127926	0.000503267	0.000307087
ttg1-9	4	TOE2	4.90133	0.138916	3.58767	0.149908	3.85433	0.0845656	4.11444	0.694387	3	0.369015	0.678737	0.584254	0.361184	0.223201	0.000503267	0.000307087
ttg1-9	8	TOE2	4.279	0.21802	3.23667	0.0985765	2.803	0.0573207	3.43956	0.758628	3	0.553601	0.903178	0.932746	0.645349	0.381439	0.000503267	0.000307087
ttg1-9	12	TOE2	3.82633	0.261762	3.34	0.0673573	2.871	0.0812999	3.34578	0.477693	3	0.979994	0.984109	0.99539	0.390705	0.280575	0.000503267	0.000307087
ttg1-9	16	TOE2	4.09133	0.136652	3.84033	0.0360463	2.91467	0.0771665	3.61544	0.619732	3	0.389453	0.990889	0.825687	0.443055	0.288337	0.000503267	0.000307087
ttg1-9	20	TOE2	4.93267	0.12403	4.50767	0.19765	4.03633	0.116703	4.49222	0.448366	3	0.943018	0.31886	0.449655	0.163896	0.120115	0.000503267	0.000307087
ttg1-9	0	TOE3	8.30933	0.295553	9.01367	0.218269	9.62	NA	8.981	0.655944	3	0.917604	0.6017	0.28692	0.165165	0.104823	0.00692196	0.0037246
ttg1-9	4	TOE3	6.49867	0.177362	6.727	0.216127	8.514	0.301912	7.24656	1.10356	3	0.197935	0.584489	0.954731	1.09684	0.510431	0.00692196	0.0037246
ttg1-9	8	TOE3	6.572	0.251141	7.41433	0.13794	7.55283	0.114354	7.17972	0.530839	3	0.249861	0.870995	1	0.444769	0.307848	0.00692196	0.0037246
ttg1-9	12	TOE3	6.45967	0.251238	7.48267	0.0547936	8.02867	0.0932005	7.32367	0.796493	3	0.668155	0.835265	0.905041	0.666901	0.383966	0.00692196	0.0037246
ttg1-9	16	TOE3	6.351	0.166705	8.748	0.283171	7.99333	0.176749	7.69744	1.22559	3	0.597716	0.70422	0.698474	0.934912	0.39979	0.00692196	0.0037246
ttg1-9	20	TOE3	7.31367	0.129566	9.30117	0.187491	9.69217	0.184103	8.769	1.27543	3	0.293905	0.998277	0.332338	0.472154	0.195048	0.00692196	0.0037246
ttg1-11	0	AP2	6.37133	0.0754674	7.48933	0.140564	8.92633	0.0964279	7.59567	1.28081	3	0.862567	0.27019	0.27671	0.395629	0.162826	0.00183303	0.00153666
ttg1-11	4	AP2	7.24967	0.122582	7.989	0.192073	9.054	0.127651	8.09756	0.907052	3	0.801695	0.207301	0.195407	0.171022	0.0912017	0.00183303	0.00153666
ttg1-11	8	AP2	6.67167	0.14806	7.41967	0.164743	10.0267	0.278605	8.03933	1.76125	3	0.408669	0.351527	0.203454	0.486239	0.143437	0.00183303	0.00153666
ttg1-11	12	AP2	5.84233	0.0348521	7.613	0.0589067	9.06267	0.0754608	7.506	1.61283	3	0.890209	0.412425	0.294453	0.606136	0.19818	0.00183303	0.00153666
ttg1-11	16	AP2	6.80167	0.0663124	8.303	0.0486621	8.25833	0.0703302	7.78767	0.854193	3	0.04994	0.110646	0.242229	0.19566	0.108234	0.00183303	0.00153666
ttg1-11	20	AP2	4.91367	0.0992589	6.58767	0.123311	7.99667	0.134087	6.49933	1.5434	3	0.905298	0.522947	0.591634	1.13286	0.388658	0.00183303	0.00153666
ttg1-11	0	CO	6.94633	0.1388	7.35833	0.145229	7.979	0.239288	7.42789	0.519835	3	0.778193	0.685407	0.504487	0.218842	0.152632	0.00275198	0.00351557
ttg1-11	4	CO	11.3463	0.250465	NA	NA	14.2173	0.421505	12.7818	2.0301	2	NA	0.295504	0.0123354	0.0380465	0.00931521	0.00275198	0.00351557
ttg1-11	8	CO	9.493	0.0719305	8.594	0.216076	NA	NA	9.0435	0.635689	2	NA	0.632765	0.164628	0.0911509	0.0586678	0.00275198	0.00351557
ttg1-11	12	CO	7.44133	0.279553	7.79267	0.280072	8.935	0.155962	8.05633	0.780961	3	0.433305	0.166923	0.326339	0.234401	0.136417	0.00275198	0.00351557
ttg1-11	16	CO	8.40333	0.0677102	8.26867	0.262668	9.216	0.283065	8.62933	0.512511	3	0.251644	0.0699857	0.219371	0.0935684	0.0655916	0.00275198	0.00351557
ttg1-11	20	CO	6.31033	0.074144	7.60833	0.191799	8.464	0.131377	7.46089	1.08438	3	0.774582	0.250207	0.493078	0.552475	0.260545	0.00275198	0.00351557
ttg1-11	0	FT	10.0323	0.190723	12.623	0.386972	14.3297	0.369814	12.3283	2.16377	3	0.774231	0.214261	0.0142457	0.0495868	0.0110664	0.002586	0.00328663
ttg1-11	4	FT	9.16767	0.211181	NA	NA	13.3892	0.435508	11.2784	2.98505	2	NA	0.802666	0.0294944	0.204028	0.0257692	0.002586	0.00328663
ttg1-11	8	FT	10.4893	0.11163	11.1953	0.35126	12.5995	0.467701	11.4281	1.07416	3	0.639519	0.268269	0.0265885	0.0293935	0.0139603	0.002586	0.00328663
ttg1-11	12	FT	6.37433	0.206167	8.77567	0.228242	9.55967	0.301029	8.23656	1.65969	3	0.45539	0.563797	0.242902	0.524542	0.166022	0.002586	0.00328663
ttg1-11	16	FT	6.531	0.204743	9.76567	0.153295	7.62867	0.233499	7.97511	1.64493	3	0.649686	0.198869	0.291161	0.619393	0.198059	0.002586	0.00328663
ttg1-11	20	FT	6.95333	0.101751	12.1782	0.133187	10.5937	0.237946	9.90839	2.67898	3	0.573374	0.285932	0.0762357	0.41198	0.0643314	0.002586	0.00328663
ttg1-11	0	SMZ	7.10667	0.0665532	8.75267	0.229658	9.27733	0.226562	8.37889	1.13258	3	0.446426	0.3307	0.289886	0.345689	0.157669	0.00330481	0.00277048
ttg1-11	4	SMZ	6.86	0.136663	9.215	0.281855	9.883	0.171653	8.65267	1.58802	3	0.404714	0.480808	0.239779	0.481083	0.160022	0.00330481	0.00277048
ttg1-11	8	SMZ	6.93	0.169404	8.605	0.0480902	9.30783	0.0511745	8.28094	1.22159	3	0.557287	0.470082	0.310249	0.413263	0.177211	0.00330481	0.00277048
ttg1-11	12	SMZ	4.925	0.0406284	8.118	0.217214	8.94033	0.146191	7.32778	2.1211	3	0.372577	0.697472	0.600679	2.01243	0.4626	0.00330481	0.00277048
ttg1-11	16	SMZ	5.60533	0.0751443	8.775	0.0821097	8.16367	0.121299	7.51467	1.68155	3	0.34911	0.449561	0.527696	1.165	0.363187	0.00330481	0.00277048
ttg1-11	20	SMZ	6.94067	0.108859	8.797	0.329404	10.0817	0.265168	8.60644	1.57915	3	0.800048	0.514107	0.247586	0.492183	0.164724	0.00330481	0.00277048
ttg1-11	0	SNZ	5.111	0.0792717	5.75167	0.114449	5.74767	0.141091	5.53678	0.36874	3	0.0103589	0.0607956	0.504565	0.146942	0.1138	0.000802187	0.000672488
ttg1-11	4	SNZ	4.74267	0.116924	5.35767	0.0604594	5.75	0.155392	5.28344	0.507752	3	0.757573	0.446167	0.60142	0.253699	0.178431	0.000802187	0.000672488
ttg1-11	8	SNZ	4.21033	0.135946	5.33867	0.0422532	6.298	0.0593184	5.28233	1.04497	3	0.910803	0.509378	0.601883	0.639999	0.310178	0.000802187	0.000672488
ttg1-11	12	SNZ	4.37267	0.0765463	5.82833	0.0492477	6.57233	0.187762	5.59111	1.11886	3	0.647317	0.354483	0.485916	0.56937	0.262172	0.000802187	0.000672488
ttg1-11	16	SNZ	4.90633	0.0440757	6.472	0.1247	6.02	0.0742428	5.79944	0.805799	3	0.542936	0.193767	0.420578	0.31464	0.179988	0.000802187	0.000672488
ttg1-11	20	SNZ	6.976	0.132725	7.75133	0.106115	7.734	0.0856563	7.48711	0.44272	3	0.0373897	0.0529736	0.130559	0.0468923	0.0345008	0.000802187	0.000672488
ttg1-11	0	SOC1	4.44267	0.0695893	6.14767	0.148891	4.36367	0.131455	4.98467	1.00796	3	0.0748627	0.510269	0.22613	0.228632	0.113687	0.000288265	0.000289855
ttg1-11	4	SOC1	3.77967	0.187714	4.91867	0.111092	3.55633	0.0661236	4.08489	0.730656	3	0.293033	0.466866	0.421908	0.278203	0.167654	0.000288265	0.000289855
ttg1-11	8	SOC1	3.11067	0.0824823	4.18833	0.0376475	2.505	0.0839146	3.268	0.852624	3	0.693478	0.796876	0.743234	0.598885	0.331649	0.000288265	0.000289855
ttg1-11	12	SOC1	3.33	0.065582	4.85967	0.0769892	3.24233	0.101086	3.81067	0.909518	3	0.0920795	0.884696	0.510231	0.448196	0.238603	0.000288265	0.000289855
ttg1-11	16	SOC1	4.113	0.0259551	5.941	0.0379298	3.628	0.0604786	4.56067	1.21975	3	0.382248	0.61575	0.303385	0.403219	0.173125	0.000288265	0.000289855
ttg1-11	20	SOC1	3.53367	0.0673251	4.87333	0.0549848	3.59533	0.13088	4.00078	0.756284	3	0.0778856	0.605171	0.447237	0.308206	0.182464	0.000288265	0.000289855
ttg1-11	0	SVP	5.439	0.0656201	7.66067	0.121143	8.064	0.12729	7.05456	1.41357	3	0.273402	0.227062	0.102838	0.171118	0.0642345	0.000468175	0.00039248
ttg1-11	4	SVP	4.094	0.116106	5.66033	0.100595	7.24767	0.147707	5.66733	1.57684	3	0.992658	0.317103	0.268998	0.533468	0.178826	0.000468175	0.00039248
ttg1-11	8	SVP	3.33933	0.136936	4.813	0.0744222	6.223	0.0831545	4.79178	1.44195	3	0.975656	0.426149	0.493534	0.847339	0.311879	0.000468175	0.00039248
ttg1-11	12	SVP	3.65567	0.0343851	5.717	0.127613	6.34633	0.0711243	5.23967	1.40741	3	0.430643	0.465411	0.361817	0.597942	0.225417	0.000468175	0.00039248
ttg1-11	16	SVP	4.787	0.0439166	7.24267	0.148655	6.38933	0.0572829	6.13967	1.24673	3	0.667093	0.20725	0.193893	0.26622	0.112186	0.000468175	0.00039248
ttg1-11	20	SVP	4.57	0.102859	6.56967	0.105255	7.653	0.135488	6.26422	1.56403	3	0.675428	0.391953	0.177856	0.348026	0.117704	0.000468175	0.00039248
ttg1-11	0	TEM1	6.897	0.0477354	7.943	0.094747	9.80867	0.197036	8.21622	1.47494	3	0.69228	0.377429	0.166239	0.295859	0.106435	0.0019426	0.00191834
ttg1-11	4	TEM1	7.54333	0.0451147	6.69567	0.141139	7.688	0.203589	7.309	0.536065	3	0.258493	0.252458	0.31177	0.1403	0.0967581	0.0019426	0.00191834
ttg1-11	8	TEM1	6.03733	0.0822537	5.401	0.198343	7.785	0.146352	6.40778	1.23442	3	0.49788	0.930078	0.582277	0.787741	0.334801	0.0019426	0.00191834
ttg1-11	12	TEM1	5.08033	0.0580115	5.35633	0.0467297	6.446	0.144864	5.62756	0.722103	3	0.367249	0.393661	1	0.649585	0.393787	0.0019426	0.00191834
ttg1-11	16	TEM1	6.391	0.0618358	7.888	0.105734	6.65233	0.0453689	6.97711	0.799602	3	0.313505	0.62694	0.392413	0.290629	0.166969	0.0019426	0.00191834
ttg1-11	20	TEM1	5.43467	0.0535506	6.72067	0.0402782	8.24167	0.255582	6.799	1.40514	3	0.907758	0.594941	0.443977	0.731865	0.276339	0.0019426	0.00191834
ttg1-11	0	TEM2	3.75733	0.0751288	4.427	0.0996695	6.153	0.133074	4.77911	1.23604	3	0.523912	0.525344	0.263361	0.356987	0.151554	0.000284137	0.000280588
ttg1-11	4	TEM2	4.35667	0.0610546	2.65533	0.127948	3.957	0.0660959	3.65633	0.889626	3	0.432697	0.442354	0.573509	0.489029	0.263955	0.000284137	0.000280588
ttg1-11	8	TEM2	2.96867	0.0904065	1.9835	0.195273	3.805	0.144786	2.91906	0.911763	3	0.909969	0.944487	0.956056	0.842613	0.447878	0.000284137	0.000280588
ttg1-11	12	TEM2	3.35767	0.0597104	2.925	0.0664204	3.592	0.0982887	3.29156	0.338379	3	0.675289	0.299079	0.738498	0.195211	0.154398	0.000284137	0.000280588
ttg1-11	16	TEM2	5.03633	0.0568008	6.04067	0.0642988	3.77967	0.0810535	4.95222	1.13284	3	0.87711	0.805361	0.233582	0.278641	0.127065	0.000284137	0.000280588
ttg1-11	20	TEM2	3.395	0.0739099	4.38733	0.0701332	5.637	0.22508	4.47311	1.12346	3	0.873623	0.2932	0.325586	0.383764	0.176145	0.000284137	0.000280588
ttg1-11	0	TOE1	3.689	0.16362	3.36333	0.0923544	2.93433	0.118429	3.32889	0.378511	3	0.849331	0.13686	0.362906	0.108871	0.0837473	0.000181349	0.000110657
ttg1-11	4	TOE1	2.77433	0.256806	3.19467	0.108057	3.10267	0.107412	3.02389	0.220963	3	0.400524	0.0215682	0.44834	0.0742053	0.0636676	0.000181349	0.000110657
ttg1-11	8	TOE1	2.66667	0.202745	2.65	0.0807465	2.29967	0.0904526	2.53878	0.207244	3	0.0768167	0.11921	0.627539	0.0969426	0.0839708	0.000181349	0.000110657
ttg1-11	12	TOE1	2.186	0.182808	3.24967	0.0274833	3.21367	0.103331	2.88311	0.603984	3	0.0569263	0.172758	0.494295	0.256988	0.169081	0.000181349	0.000110657
ttg1-11	16	TOE1	2.559	0.297745	3.258	0.0615034	2.66067	0.0485661	2.82589	0.377656	3	0.257854	0.0393415	0.514295	0.153892	0.118449	0.000181349	0.000110657
ttg1-11	20	TOE1	3.29633	0.302749	2.93333	0.0853307	2.85667	0.142339	3.02878	0.234859	3	0.313125	0.117114	0.446824	0.0789949	0.0671273	0.000181349	0.000110657
ttg1-11	0	TOE2	5.61233	0.120394	3.90933	0.0908313	3.95367	0.11809	4.49178	0.970683	3	0.0436176	0.681896	0.449793	0.431697	0.22028	0.000503267	0.000307087
ttg1-11	4	TOE2	4.70233	0.18344	3.811	0.125012	3.986	0.0907414	4.16644	0.47227	3	0.355906	0.660003	0.56357	0.218265	0.157332	0.000503267	0.000307087
ttg1-11	8	TOE2	4.47533	0.166633	3.09633	0.0609207	2.89533	0.100913	3.489	0.860082	3	0.223677	0.848586	0.90132	0.734703	0.404763	0.000503267	0.000307087
ttg1-11	12	TOE2	3.283	0.256641	3.862	0.0969467	2.9285	0.18358	3.35783	0.471228	3	0.736503	0.954889	0.987107	0.381308	0.275057	0.000503267	0.000307087
ttg1-11	16	TOE2	4.2	0.230504	3.94267	0.124277	3.114	0.0504348	3.75222	0.567495	3	0.436816	0.758964	0.751002	0.361944	0.244235	0.000503267	0.000307087
ttg1-11	20	TOE2	5.252	0.191725	3.956	0.204402	3.99	0.106816	4.39933	0.738627	3	0.0439606	0.51513	0.479558	0.320626	0.192154	0.000503267	0.000307087
ttg1-11	0	TOE3	9.35233	0.222833	12.0693	0.299624	11.785	0.289273	11.0689	1.49336	3	0.182092	0.0844392	0.0674907	0.122526	0.0435191	0.00692196	0.0037246
ttg1-11	4	TOE3	7.21367	0.202038	10.1635	0.104974	NA	NA	8.68858	2.08585	2	NA	0.677216	0.351389	1.14034	0.268616	0.00692196	0.0037246
ttg1-11	8	TOE3	7.22733	0.158785	9.86067	0.221886	8.77233	0.397772	8.62011	1.32325	3	0.809415	0.223823	0.368468	0.553546	0.221216	0.00692196	0.0037246
ttg1-11	12	TOE3	6.556	0.221433	11.0687	0.135345	NA	NA	8.81233	3.19094	2	NA	0.66556	0.322504	2.62262	0.287188	0.00692196	0.0037246
ttg1-11	16	TOE3	8.81167	0.288453	11.5198	0.287477	10.0473	0.14849	10.1263	1.35581	3	0.903653	0.0510608	0.129717	0.202282	0.0790348	0.00692196	0.0037246
ttg1-11	20	TOE3	9.729	0.25935	10.6985	0.23875	12.4332	0.124615	10.9536	1.37001	3	0.690726	0.118905	0.0731077	0.115855	0.0448231	0.00692196	0.0037246
Col-0(OE02)	0	AP2	5.69	0.098963	6.60833	0.0696156	9.17267	0.219291	7.157	1.805	3	0.491241	1	0.386519	0.964089	0.275904	0.00472222	0.00372651
Col-0(OE02)	4	AP2	6.451	0.0635216	6.975	0.100557	9.84467	0.144749	7.75689	1.82695	3	0.274837	1	0.255027	0.649775	0.183145	0.00472222	0.00372651
Col-0(OE02)	8	AP2	5.54517	0.0271815	6.17833	0.164528	7.303	0.181977	6.34217	0.890295	3	0.694328	1	0.679924	0.580352	0.313102	0.00472222	0.00372651
Col-0(OE02)	12	AP2	5.703	0.108824	6.59433	0.080544	7.78533	0.190729	6.69422	1.04475	3	0.841681	1	0.532698	0.566266	0.274484	0.00472222	0.00372651
Col-0(OE02)	16	AP2	6.22367	0.0390085	6.725	0.0785154	7.60433	0.171781	6.851	0.698904	3	0.700591	1	0.477844	0.297826	0.183473	0.00472222	0.00372651
Col-0(OE02)	20	AP2	6.23367	0.240729	5.85	0.0689396	6.598	0.0837377	6.22722	0.374042	3	0.971502	1	0.736312	0.217932	0.168161	0.00472222	0.00372651
Col-0(OE02)	0	CCA1	1.72133	0.101692	1.51033	0.174111	2.59267	0.10161	1.94144	0.573758	3	0.353186	1	0.788856	0.385273	0.258852	8.74421e-05	0.000166803
Col-0(OE02)	4	CCA1	3.102	0.150215	2.62667	0.0869808	NA	NA	2.86433	0.336111	2	NA	1	0.416083	0.109159	0.0864731	8.74421e-05	0.000166803
Col-0(OE02)	8	CCA1	6.73133	0.155286	5.55167	0.0811932	5.957	0.066458	6.08	0.599375	3	0.658766	1	0.0447887	0.0230688	0.0152264	8.74421e-05	0.000166803
Col-0(OE02)	12	CCA1	10.2368	0.137865	10.0523	0.188549	10.2342	0.0398602	10.1744	0.10576	3	0.0240786	1	0.00262191	0.000199425	0.000185329	8.74421e-05	0.000166803
Col-0(OE02)	16	CCA1	8.445	0.273051	8.73967	0.0859612	8.57783	0.11187	8.5875	0.147571	3	0.891597	1	0.00787654	0.000848326	0.000765843	8.74421e-05	0.000166803
Col-0(OE02)	20	CCA1	6.451	0.14702	6.28167	0.0727576	4.93433	0.136406	5.889	0.83109	3	0.194904	1	0.0511287	0.0398307	0.022389	8.74421e-05	0.000166803
Col-0(OE02)	0	CO	7.47033	0.113861	7.32567	0.158466	7.60433	NA	7.46678	0.139367	3	0.9578	1	0.596254	0.0604733	0.0549048	0.00303526	0.00497336
Col-0(OE02)	4	CO	11.2113	0.199897	11.313	0.0505734	8.6705	0.106243	10.3983	1.49716	3	0.0648581	1	0.078156	0.142468	0.0504693	0.00303526	0.00497336
Col-0(OE02)	8	CO	9.26033	0.205969	9.42267	0.0875462	8.10967	0.263656	8.93089	0.715816	3	0.217027	1	0.216118	0.138837	0.0845321	0.00303526	0.00497336
Col-0(OE02)	12	CO	7.10233	0.291214	7.46233	0.100572	6.78733	0.0933452	7.11733	0.33775	3	0.926526	1	0.75967	0.200389	0.158562	0.00303526	0.00497336
Col-0(OE02)	16	CO	7.80733	0.237622	7.99167	0.0605668	6.848	0.0317175	7.549	0.61404	3	0.287755	1	0.563223	0.298812	0.195233	0.00303526	0.00497336
Col-0(OE02)	20	CO	6.51633	0.198724	6.46833	0.110115	7.17767	0.302831	6.72078	0.396405	3	0.115702	1	1	0.316224	0.240251	0.00303526	0.00497336
Col-0(OE02)	0	FLC	8.51933	0.037063	8.359	0.0544794	8.92433	0.074628	8.60089	0.291357	3	0.532364	1	0.418155	0.0935794	0.0764668	0.00304603	0.0014806
Col-0(OE02)	4	FLC	8.98867	0.0880871	8.46567	0.10162	9.38033	0.17663	8.94489	0.458902	3	0.842035	1	0.329445	0.123376	0.0897608	0.00304603	0.0014806
Col-0(OE02)	8	FLC	8.704	0.067466	8.09833	0.0646813	9.36633	0.206873	8.72289	0.634211	3	0.950733	1	0.384248	0.212139	0.13668	0.00304603	0.0014806
Col-0(OE02)	12	FLC	8.36833	0.0238607	7.56667	0.0678405	8.996	0.0248797	8.31033	0.71643	3	0.865988	1	0.511451	0.328919	0.200181	0.00304603	0.0014806
Col-0(OE02)	16	FLC	8.516	0.03747	7.655	0.0411299	8.79233	0.0496051	8.32111	0.593185	3	0.448975	1	0.507644	0.258174	0.171138	0.00304603	0.0014806
Col-0(OE02)	20	FLC	8.631	0.114222	8.13367	0.0920507	8.64567	0.0679804	8.47011	0.291462	3	0.0480582	1	0.457832	0.102499	0.0837494	0.00304603	0.0014806
Col-0(OE02)	0	FT	11.626	0.0351568	10.804	0.175786	11.866	0.158703	11.432	0.556945	3	0.414753	1	0.0231903	0.0109261	0.00742693	0.00127794	0.000875613
Col-0(OE02)	4	FT	11.6312	0.144062	9.719	0.142501	NA	NA	10.6751	1.35211	2	NA	1	0.0391887	0.0608541	0.0238377	0.00127794	0.000875613
Col-0(OE02)	8	FT	11.564	0.188489	10.2925	0.151369	11.9578	0.149629	11.2714	0.870359	3	0.435875	1	0.0259202	0.021465	0.0117416	0.00127794	0.000875613
Col-0(OE02)	12	FT	7.71667	0.309625	6.803	0.16211	9.07433	0.231472	7.86467	1.14288	3	0.785361	1	0.274904	0.332141	0.150412	0.00127794	0.000875613
Col-0(OE02)	16	FT	5.51067	0.231625	6.37	0.199019	6.12433	0.0819187	6.00167	0.442605	3	0.537083	1	1	0.359056	0.264195	0.00127794	0.000875613
Col-0(OE02)	20	FT	7.456	0.20521	7.41533	0.143183	7.94867	0.218833	7.60667	0.296878	3	0.13091	1	0.328736	0.0751105	0.0611409	0.00127794	0.000875613
Col-0(OE02)	0	GI	13.1562	0.586646	15.0295	0.238963	13.156	0.108972	13.7806	1.08162	3	0.000147145	1	0.00409982	0.00457708	0.00216266	0.00106371	0.000809578
Col-0(OE02)	4	GI	7.12633	0.0640364	8.43367	0.187556	11.7743	0.110002	9.11144	2.39698	3	0.527508	1	0.104306	0.445072	0.084502	0.00106371	0.000809578
Col-0(OE02)	8	GI	5.01933	0.0375144	4.48467	0.0416693	8.047	0.119281	5.85033	1.92106	3	0.26664	1	1	2.78701	0.73594	0.00106371	0.000809578
Col-0(OE02)	12	GI	6.71467	0.175067	6.676	0.0326956	9.94233	0.14121	7.77767	1.87476	3	0.0196957	1	0.262915	0.701298	0.191225	0.00106371	0.000809578
Col-0(OE02)	16	GI	9.50867	0.0601609	9.43567	0.0283784	15.0758	0.0864802	11.3401	3.23548	3	0.0215459	1	0.0222551	0.187352	0.0198921	0.00106371	0.000809578
Col-0(OE02)	0	LHY	0.903333	0.158797	-0.337333	0.0587736	3.25067	0.11525	1.27222	1.82222	3	0.663429	1	1	2.53626	0.717215	0.000148116	0.000271284
Col-0(OE02)	4	LHY	4.70033	0.0943115	1.60567	0.126108	NA	NA	3.153	2.18826	2	NA	1	0.271537	0.966009	0.211958	0.000148116	0.000271284
Col-0(OE02)	8	LHY	9.08367	0.178875	8.07333	0.235158	9.83667	0.167691	8.99789	0.884791	3	0.839462	1	0.00472436	0.00399915	0.0021658	0.000148116	0.000271284
Col-0(OE02)	12	LHY	10.2493	0.160871	10.0597	0.174337	10.9802	0.246821	10.4297	0.48604	3	0.375046	1	0.00175113	0.000701494	0.000500854	0.000148116	0.000271284
Col-0(OE02)	16	LHY	7.094	0.117595	5.88833	0.0362399	8.35667	0.0499466	7.113	1.23428	3	0.974538	1	0.0174482	0.023601	0.0100317	0.000148116	0.000271284
Col-0(OE02)	20	LHY	3.70267	0.115318	3.18867	0.0604759	3.24717	0.171111	3.3795	0.281395	3	0.198882	1	0.232085	0.0499839	0.0411265	0.000148116	0.000271284
Col-0(OE02)	0	PRR5	9.47733	0.188764	9.44	0.151816	9.94433	0.234362	9.62056	0.28102	3	0.126955	1	0.00904359	0.00194486	0.00160064	0.000143974	0.000128893
Col-0(OE02)	4	PRR5	8.62133	0.0326599	8.85567	0.161763	9.52467	0.109857	9.00056	0.468772	3	0.482473	1	0.0138989	0.00533621	0.00385583	0.000143974	0.000128893
Col-0(OE02)	8	PRR5	2.93167	0.0709554	2.512	0.0573643	3.206	0.077201	2.88322	0.349527	3	0.770203	1	0.964895	0.264519	0.207606	0.000143974	0.000128893
Col-0(OE02)	12	PRR5	4.489	0.122752	3.97733	0.0455778	5.421	0.044572	4.62911	0.731961	3	0.681927	1	0.287684	0.190129	0.114474	0.000143974	0.000128893
Col-0(OE02)	16	PRR5	5.30667	0.0347611	5.491	0.0517172	5.92933	0.0339313	5.57567	0.319851	3	0.558251	1	0.14927	0.0370492	0.029682	0.000143974	0.000128893
Col-0(OE02)	20	PRR5	6.21367	0.109883	6.211	0.0802538	6.676	0.0958384	6.36689	0.267701	3	0.00951243	1	0.0862565	0.0175867	0.0146082	0.000143974	0.000128893
Col-0(OE02)	0	PRR7	10.1587	0.0828814	10.6247	0.15814	10.92	0.168683	10.5678	0.383842	3	0.754186	1	0.00791851	0.00241365	0.00184981	0.000245518	0.000222814
Col-0(OE02)	4	PRR7	4.696	0.0557016	5.15	0.0871091	5.94933	0.0868639	5.26511	0.634546	3	0.698707	1	0.31254	0.172662	0.111219	0.000245518	0.000222814
Col-0(OE02)	8	PRR7	3.60267	0.0244881	3.39	0.0392641	3.769	0.0700857	3.58722	0.189971	3	0.865422	1	1	0.140741	0.123377	0.000245518	0.000222814
Col-0(OE02)	12	PRR7	6.492	0.114782	5.514	0.041845	6.572	0.0846089	6.19267	0.589102	3	0.129779	1	0.164317	0.0828669	0.0550863	0.000245518	0.000222814
Col-0(OE02)	16	PRR7	9.289	0.139291	9.40067	0.0592312	9.57867	0.088683	9.42278	0.146094	3	0.748949	1	0.0175115	0.00186618	0.00168646	0.000245518	0.000222814
Col-0(OE02)	20	PRR7	12.2272	0.167257	12.175	0.304629	12.46	0.281846	12.2874	0.151744	3	0.329925	1	0.0024043	0.000266665	0.000240042	0.000245518	0.000222814
Col-0(OE02)	0	PRR9	9.31933	0.0937372	10.2287	0.168441	9.8645	0.142174	9.80417	0.457659	3	0.781478	1	0.0450759	0.0168274	0.0122531	0.000787372	0.0006672
Col-0(OE02)	4	PRR9	4.64533	0.0366833	5.60733	0.0604924	7.069	0.0830221	5.77389	1.22039	3	0.773739	1	0.73651	0.979627	0.420424	0.000787372	0.0006672
Col-0(OE02)	8	PRR9	6.62067	0.0470177	5.94133	0.0385443	6.97467	0.0887431	6.51222	0.525133	3	0.65659	1	0.441487	0.193842	0.1347	0.000787372	0.0006672
Col-0(OE02)	12	PRR9	11.8623	0.130833	11.854	0.087155	12.5137	0.186217	12.0767	0.378476	3	0.0210262	1	0.0093294	0.00279852	0.00215276	0.000787372	0.0006672
Col-0(OE02)	16	PRR9	12.172	0.036973	13.4077	0.215129	14.1093	0.307256	13.2297	0.980856	3	0.698595	1	0.00419533	0.00408472	0.00206964	0.000787372	0.0006672
Col-0(OE02)	20	PRR9	15.1402	0.0824793	14.4368	0.39824	15.619	0.224622	15.0653	0.594626	3	0.791432	1	0.00117537	0.000599535	0.000397022	0.000787372	0.0006672
Col-0(OE02)	0	SMZ	6.925	0.11256	6.93833	0.178444	10.7157	0.236056	8.193	2.1847	3	0.00582798	1	0.195618	0.693727	0.15259	0.00483335	0.00383555
Col-0(OE02)	4	SMZ	6.671	0.159675	7.18167	0.0509248	NA	NA	6.92633	0.361096	2	NA	1	0.470667	0.133858	0.104218	0.00483335	0.00383555
Col-0(OE02)	8	SMZ	6.62767	0.0875747	6.293	0.163354	7.21467	0.151853	6.71178	0.466555	3	0.700592	1	0.546136	0.208518	0.150903	0.00483335	0.00383555
Col-0(OE02)	12	SMZ	5.41633	0.0515105	5.833	0.0925887	6.55867	0.143364	5.936	0.57809	3	0.704122	1	0.935047	0.460858	0.308706	0.00483335	0.00383555
Col-0(OE02)	16	SMZ	5.12033	0.181806	5.96867	0.0767963	6.42833	0.183866	5.83911	0.663554	3	0.675509	1	1	0.58398	0.368679	0.00483335	0.00383555
Col-0(OE02)	20	SMZ	7.55667	0.0694142	7.255	0.109939	8.51933	0.0944105	7.777	0.660337	3	0.440133	1	0.260998	0.151497	0.0958566	0.00483335	0.00383555
Col-0(OE02)	0	SNZ	5.16167	0.131074	5.96667	0.0417931	4.785	0.140303	5.30444	0.603633	3	0.605993	1	0.677258	0.351862	0.231558	0.00248079	0.00207123
Col-0(OE02)	4	SNZ	5.153	0.113537	5.53933	0.0771794	4.983	0.11825	5.22511	0.285091	3	0.578219	1	0.715543	0.156337	0.128304	0.00248079	0.00207123
Col-0(OE02)	8	SNZ	5.71	0.109766	5.05567	0.180756	4.11833	0.0673993	4.96133	0.800015	3	0.804631	1	0.859095	0.636692	0.36568	0.00248079	0.00207123
Col-0(OE02)	12	SNZ	4.75633	0.129096	5.013	0.0492916	4.45733	0.114178	4.74222	0.278102	3	0.916048	1	1	0.212599	0.175325	0.00248079	0.00207123
Col-0(OE02)	16	SNZ	6.137	0.223056	5.30767	0.056795	4.44667	0.208668	5.29711	0.845216	3	0.979344	1	0.680709	0.542208	0.301808	0.00248079	0.00207123
Col-0(OE02)	20	SNZ	7.46167	0.30286	7.02533	0.101492	6.20067	0.0867487	6.89589	0.640388	3	0.663941	1	0.224741	0.125574	0.0805605	0.00248079	0.00207123
Col-0(OE02)	0	SOC1	6.703	0.0726269	4.35233	0.0696587	2.991	0.101078	4.68211	1.87784	3	0.708403	1	0.420594	1.1252	0.306155	0.00053435	0.000799798
Col-0(OE02)	4	SOC1	5.70267	0.0971665	2.707	0.0680343	NA	NA	4.20483	2.11826	2	NA	1	0.585515	1.95661	0.450656	0.00053435	0.000799798
Col-0(OE02)	8	SOC1	6.088	0.0940727	2.404	0.0756813	2.55433	0.064982	3.68211	2.08492	3	0.0688703	1	0.841188	2.72756	0.642912	0.00053435	0.000799798
Col-0(OE02)	12	SOC1	5.98667	0.121854	2.47633	0.0740315	3.261	0.0617954	3.908	1.84244	3	0.409829	1	0.719273	1.86015	0.518703	0.00053435	0.000799798
Col-0(OE02)	16	SOC1	4.538	0.560424	4.06333	0.046694	3.15533	0.0290057	3.91889	0.70256	3	0.658122	1	0.713865	0.447871	0.275208	0.00053435	0.000799798
Col-0(OE02)	20	SOC1	5.5505	0.17499	2.968	0.0665031	1.77933	0.138494	3.43261	1.92804	3	0.598477	1	1	2.80537	0.737213	0.00053435	0.000799798
Col-0(OE02)	0	SVP	6.57467	0.105477	5.41567	0.0369955	6.92733	0.139256	6.30589	0.790864	3	0.429438	1	0.165932	0.121149	0.0700238	0.00121683	0.00101595
Col-0(OE02)	4	SVP	4.27567	0.0537277	4.22	0.0747975	5.29067	0.114854	4.59544	0.602723	3	0.0882273	1	0.543033	0.281606	0.18544	0.00121683	0.00101595
Col-0(OE02)	8	SVP	5.31033	0.0466726	3.302	0.174773	3.591	0.0771924	4.06778	1.08574	3	0.254937	1	0.782834	0.878706	0.414002	0.00121683	0.00101595
Col-0(OE02)	12	SVP	4.51867	0.0435125	3.32867	0.0653427	4.109	0.144051	3.98544	0.604545	3	0.660171	1	0.828809	0.431394	0.283719	0.00121683	0.00101595
Col-0(OE02)	16	SVP	5.252	0.152722	4.414	0.0481941	4.12833	0.0407513	4.59811	0.58402	3	0.471879	1	0.54203	0.270484	0.180441	0.00121683	0.00101595
Col-0(OE02)	20	SVP	7.22567	0.130615	4.93167	0.0727622	4.84	0.118575	5.66578	1.35168	3	0.0647727	1	0.258597	0.401367	0.15727	0.00121683	0.00101595
Col-0(OE02)	0	TEM1	7.48033	0.112408	6.06467	0.0491766	8.307	0.112529	7.284	1.13399	3	0.712552	1	0.249558	0.298132	0.135845	0.0039077	0.00188414
Col-0(OE02)	4	TEM1	8.34833	0.120836	6.95633	0.210368	8.258	0.16679	7.85422	0.778905	3	0.11081	1	0.16808	0.120317	0.0701216	0.0039077	0.00188414
Col-0(OE02)	8	TEM1	7.56433	0.0657622	5.26333	0.0399917	5.42767	0.0313262	6.08511	1.28368	3	0.122332	1	0.572891	0.821862	0.337578	0.0039077	0.00188414
Col-0(OE02)	12	TEM1	5.41933	0.0440379	6.147	0.0571635	4.323	0.0602661	5.29644	0.918189	3	0.778134	1	0.989657	0.880538	0.465957	0.0039077	0.00188414
Col-0(OE02)	16	TEM1	5.55567	0.0849745	5.11367	0.0963864	5.175	0.0390768	5.28144	0.239455	3	0.245266	1	1	0.180547	0.152935	0.0039077	0.00188414
Col-0(OE02)	20	TEM1	6.666	0.0955772	6.50267	0.0902349	5.84167	0.0774962	6.33678	0.436487	3	0.359453	1	0.481186	0.170005	0.125622	0.0039077	0.00188414
Col-0(OE02)	0	TEM2	4.02767	0.0582952	3.43167	0.0246238	5.68967	0.238396	4.383	1.17019	3	0.491782	1	0.195814	0.244847	0.108801	0.000410494	0.000197924
Col-0(OE02)	4	TEM2	4.64933	0.0790084	3.57933	0.192527	4.07367	0.121026	4.10078	0.535515	3	0.916238	1	0.238123	0.107027	0.0738389	0.000410494	0.000197924
Col-0(OE02)	8	TEM2	4.22733	0.0692146	1.348	0.0561842	1.85	0.0307246	2.47511	1.53809	3	0.31307	1	0.734811	1.39915	0.481785	0.000410494	0.000197924
Col-0(OE02)	12	TEM2	2.63933	0.0660555	3.47067	0.0599694	1.99433	0.0682666	2.70144	0.740124	3	0.861075	1	0.62812	0.421041	0.252072	0.000410494	0.000197924
Col-0(OE02)	16	TEM2	1.74	0.0680123	1.695	0.0486004	2.65667	0.0492375	2.03056	0.542695	3	0.079205	1	1	0.456691	0.313513	0.000410494	0.000197924
Col-0(OE02)	20	TEM2	4.06733	0.0882175	3.50467	0.0621396	3.59867	0.0836461	3.72356	0.301407	3	0.299035	1	0.309283	0.0718607	0.0583121	0.000410494	0.000197924
Col-0(OE02)	0	TOC1	7.85033	0.121899	7.61833	0.19177	10.7743	0.181853	8.74767	1.75897	3	0.126042	1	0.0733643	0.174943	0.0516882	0.00104948	0.00181803
Col-0(OE02)	4	TOC1	8.59867	0.107384	9.278	0.0772442	NA	NA	8.93833	0.480361	2	NA	1	0.0642819	0.0253973	0.0182047	0.00104948	0.00181803
Col-0(OE02)	8	TOC1	5.71	0.203724	5.56467	0.0613379	7.21	0.0748376	6.16156	0.910883	3	0.152523	1	0.440536	0.387758	0.206233	0.00104948	0.00181803
Col-0(OE02)	12	TOC1	4.21467	0.170104	4.386	0.0720046	6.336	0.0857827	4.97889	1.17841	3	0.138963	1	1	1.26327	0.558162	0.00104948	0.00181803
Col-0(OE02)	16	TOC1	5.55283	0.06019	7.35533	0.0493626	8.412	0.160719	7.10672	1.44571	3	0.71451	1	0.228801	0.394444	0.144805	0.00104948	0.00181803
Col-0(OE02)	20	TOC1	7.402	0.164842	6.85267	0.0622468	7.14533	0.327934	7.13333	0.274863	3	0.927773	1	0.22462	0.047143	0.0389651	0.00104948	0.00181803
Col-0(OE02)	0	TOE1	2.58067	0.057735	3.43867	0.0416133	3.711	0.146297	3.24344	0.589913	3	0.444855	1	0.275943	0.139394	0.0926113	0.000152923	0.000168955
Col-0(OE02)	4	TOE1	1.804	0.0945463	1.746	0.0913382	2.989	0.266716	2.17967	0.701503	3	0.0789757	1	0.576832	0.361211	0.22212	0.000152923	0.000168955
Col-0(OE02)	8	TOE1	1.539	0.0547327	1.61667	0.0691689	1.97367	0.0446019	1.70978	0.23181	3	0.321459	1	0.798913	0.139257	0.118586	0.000152923	0.000168955
Col-0(OE02)	12	TOE1	1.794	0.116181	1.76667	0.0529087	2.46833	0.16839	2.00967	0.397452	3	0.0656848	1	0.648969	0.20584	0.156273	0.000152923	0.000168955
Col-0(OE02)	16	TOE1	1.58433	0.0702377	2.05133	0.0499833	2.08433	0.0771838	1.90667	0.279636	3	0.112757	1	0.696996	0.14908	0.122812	0.000152923	0.000168955
Col-0(OE02)	20	TOE1	2.02433	0.237134	1.80967	0.0498029	2.046	0.0209205	1.96	0.130642	3	0.158554	1	0.6717	0.0636645	0.0581527	0.000152923	0.000168955
Col-0(OE02)	0	TOE2	3.83733	0.112709	4.951	0.0404434	4.991	0.140077	4.59311	0.654828	3	0.0583407	1	0.300895	0.172843	0.109781	0.000424971	0.000469524
Col-0(OE02)	4	TOE2	3.482	0.100095	4.163	0.0977377	4.5	0.262268	4.04833	0.518597	3	0.632015	1	0.438945	0.18987	0.132539	0.000424971	0.000469524
Col-0(OE02)	8	TOE2	2.93733	0.0959705	3.25233	0.189129	3.13267	0.072037	3.10744	0.159007	3	0.736808	1	0.842647	0.0981841	0.0879377	0.000424971	0.000469524
Col-0(OE02)	12	TOE2	2.81367	0.10336	3.05533	0.0563176	3.31967	0.180813	3.06289	0.253085	3	0.950617	1	0.869077	0.166648	0.139834	0.000424971	0.000469524
Col-0(OE02)	16	TOE2	2.98367	0.0722957	3.19533	0.0915878	3.38367	0.0901295	3.18756	0.200113	3	0.935703	1	0.797131	0.118604	0.103243	0.000424971	0.000469524
Col-0(OE02)	20	TOE2	3.27767	0.0720648	3.78933	0.0688743	4.033	0.11348	3.7	0.385509	3	0.614104	1	0.558816	0.171177	0.131037	0.000424971	0.000469524
Col-0(OE02)	0	TOE3	7.87	0.133304	8.59183	0.0407165	NA	NA	8.23092	0.510413	2	NA	1	0.271365	0.115183	0.0808609	0.00464438	0.00506281
Col-0(OE02)	4	TOE3	6.306	0.182414	7.125	0.0745363	10.2003	0.304556	7.87711	2.05322	3	0.383479	1	0.346784	1.09248	0.263228	0.00464438	0.00506281
Col-0(OE02)	8	TOE3	5.97633	0.132115	5.59867	0.0357957	7.47267	0.279507	6.34922	0.991087	3	0.366127	1	1	0.987682	0.496901	0.00464438	0.00506281
Col-0(OE02)	12	TOE3	6.10767	0.141461	5.98833	0.159335	8.835	0.167233	6.977	1.61018	3	0.0707877	1	0.647173	1.32858	0.435186	0.00464438	0.00506281
Col-0(OE02)	16	TOE3	6.21	0.191694	7.36267	0.076409	9.196	0.270135	7.58956	1.50587	3	0.750083	1	0.423275	0.778812	0.274233	0.00464438	0.00506281
Col-0(OE02)	20	TOE3	7.75367	0.209898	7.15233	0.13626	8.59233	0.0801894	7.83278	0.723252	3	0.818811	1	0.357606	0.232766	0.140993	0.00464438	0.00506281
Col-0(OE02)	0	TTG1 both	7.044	0.104114	4.70633	0.0557614	4.36467	0.030654	5.37167	1.45832	3	0.224243	1	0.00195915	0.00342438	0.00124618	1.52185e-06	7.39734e-07
Col-0(OE02)	4	TTG1 both	7.14433	0.111663	4.95667	0.0937692	4.82	0.108838	5.64033	1.30429	3	0.100105	1	0.00162627	0.00239	0.000967759	1.52185e-06	7.39734e-07
Col-0(OE02)	8	TTG1 both	5.38267	0.0488399	4.46567	0.0118884	4.11433	0.0401539	4.65422	0.654853	3	0.518679	1	0.00322137	0.00185053	0.00117535	1.52185e-06	7.39734e-07
Col-0(OE02)	12	TTG1 both	6.226	0.0593296	4.87767	0.0495816	4.641	0.0289655	5.24822	0.855009	3	0.265176	1	0.00213417	0.00172605	0.000954267	1.52185e-06	7.39734e-07
Col-0(OE02)	16	TTG1 both	5.35267	0.0827728	4.81033	0.0603628	4.61	0.0511631	4.92433	0.384234	3	0.503704	1	0.00267134	0.000815202	0.000624596	1.52185e-06	7.39734e-07
Col-0(OE02)	20	TTG1 both	5.80033	0.102904	5.75617	0.264284	4.56533	0.0973995	5.37394	0.700626	3	0.0602077	1	0.00195606	0.00122295	0.000752486	1.52185e-06	7.39734e-07
Col-0(OE02)	0	TTG1 endo	5.30233	0.207383	4.166	0.151377	3.84033	0.127649	4.43622	0.767545	3	0.408276	1	0.730128	0.512821	0.301239	0.000296556	0.000144148
Col-0(OE02)	4	TTG1 endo	5.20867	0.135792	4.39	0.134107	4.135	0.156044	4.57789	0.560952	3	0.437924	1	0.661841	0.314534	0.213209	0.000296556	0.000144148
Col-0(OE02)	8	TTG1 endo	4.067	0.0980034	4.15833	0.0801103	3.751	0.0931433	3.99211	0.213744	3	0.411214	1	0.993322	0.158627	0.136784	0.000296556	0.000144148
Col-0(OE02)	12	TTG1 endo	4.902	0.0433128	4.24	0.0679681	3.99933	0.0607728	4.38044	0.467435	3	0.497261	1	0.75891	0.290396	0.210029	0.000296556	0.000144148
Col-0(OE02)	16	TTG1 endo	4.15467	0.0714936	4.01067	0.105794	4.25633	0.117259	4.14056	0.12344	3	0.810613	1	0.896198	0.0800564	0.0734915	0.000296556	0.000144148
Col-0(OE02)	20	TTG1 endo	4.70467	0.18501	4.094	0.13149	3.80233	0.11711	4.20033	0.460469	3	0.615462	1	0.859823	0.323284	0.234946	0.000296556	0.000144148
Col-0(OE02)	0	TTG1 no LWD	6.83033	0.233021	4.65667	0.0860078	4.271	0.0131022	5.25267	1.37984	3	0.26778	1	0.00208606	0.0033427	0.00128447	1.49214e-06	7.25292e-07
Col-0(OE02)	4	TTG1 no LWD	6.96367	0.0882345	4.88167	0.124067	4.81267	0.110796	5.55267	1.22245	3	0.0539073	1	0.00169441	0.00225937	0.000968264	1.49214e-06	7.25292e-07
Col-0(OE02)	8	TTG1 no LWD	5.21733	0.0363822	4.48667	0.0210792	3.95333	0.0610601	4.55244	0.634562	3	0.828319	1	0.00338935	0.0018725	0.00120615	1.49214e-06	7.25292e-07
Col-0(OE02)	12	TTG1 no LWD	5.95733	0.0686027	4.589	0.0736659	4.66567	0.128815	5.07067	0.768832	3	0.0952635	1	0.00236655	0.00166579	0.000977639	1.49214e-06	7.25292e-07
Col-0(OE02)	16	TTG1 no LWD	5.109	0.0583095	4.57633	0.0569356	4.73	0.064348	4.80511	0.274162	3	0.5425	1	0.00284483	0.000595397	0.000492352	1.49214e-06	7.25292e-07
Col-0(OE02)	20	TTG1 no LWD	5.54533	0.0696443	4.79067	0.135264	4.28833	0.0675401	4.87478	0.632707	3	0.779633	1	0.00271071	0.00149217	0.000962398	1.49214e-06	7.25292e-07
OE02	0	AP2	6.43933	0.154173	5.231	0.13896	8.308	0.147569	6.65944	1.55026	3	0.764566	0.735927	0.545695	1.05249	0.359369	0.00472222	0.00372651
OE02	4	AP2	6.356	0.136406	6.283	0.0953345	9.46767	0.190849	7.36889	1.81796	3	0.0383477	0.807162	0.333723	0.842926	0.239072	0.00472222	0.00372651
OE02	8	AP2	5.84333	0.164947	5.33	0.0702329	8.54567	0.402278	6.573	1.72755	3	0.284807	0.850208	0.579392	1.33935	0.404436	0.00472222	0.00372651
OE02	12	AP2	5.61933	0.263259	5.38067	0.0614844	8.81	0.128358	6.60333	1.91475	3	0.119106	0.946879	0.567337	1.5718	0.416869	0.00472222	0.00372651
OE02	16	AP2	6.10133	0.215785	5.2535	0.143734	9.32583	0.069389	6.89356	2.14865	3	0.379293	0.976474	0.463955	1.59328	0.359322	0.00472222	0.00372651
OE02	20	AP2	5.41333	0.0981411	5.04233	0.206684	6.90117	0.218144	5.78561	0.983747	3	0.362301	0.527954	1	0.977595	0.494335	0.00472222	0.00372651
OE02	0	CCA1	1.1525	NA	1.481	0.137528	2.16433	0.138681	1.59928	0.516182	3	0.353186	0.485813	1	0.430165	0.30078	8.74421e-05	0.000166803
OE02	4	CCA1	6.685	0.149583	3.081	0.202731	4.61933	0.158298	4.79511	1.80842	3	0.839042	0.201499	0.109134	0.273116	0.0779755	8.74421e-05	0.000166803
OE02	8	CCA1	5.09767	0.250827	5.421	0.0688331	6.29133	0.10717	5.60333	0.617369	3	0.658766	0.391688	0.0623246	0.033286	0.0216977	8.74421e-05	0.000166803
OE02	12	CCA1	6.03533	0.198306	5.89067	0.0729475	8.30267	0.151748	6.74289	1.35274	3	0.0240786	0.0473145	0.0282891	0.0439604	0.0172126	8.74421e-05	0.000166803
OE02	16	CCA1	4.225	0.0957688	4.412	0.0293201	6.75267	0.0723418	5.12989	1.40847	3	0.891597	0.0496993	0.0865327	0.143174	0.053935	8.74421e-05	0.000166803
OE02	20	CCA1	5.373	0.0849882	4.44133	0.0723072	6.004	0.152655	5.27278	0.786139	3	0.194904	0.403797	0.078373	0.0567776	0.032925	8.74421e-05	0.000166803
OE02	0	CO	7.34533	0.251606	7.16867	0.0705077	7.58117	0.194923	7.36506	0.206956	3	0.842201	0.524188	0.639813	0.0986913	0.0855025	0.00303526	0.00497336
OE02	4	CO	10.1937	0.300858	10.765	0.214892	8.93667	0.150381	9.96511	0.93535	3	0.592764	0.696644	0.105526	0.0962768	0.0503447	0.00303526	0.00497336
OE02	8	CO	9.696	0.158312	10.0015	0.15765	8.438	0.252585	9.3785	0.828696	3	0.354061	0.5188	0.15847	0.122985	0.0692452	0.00303526	0.00497336
OE02	12	CO	7.905	0.311847	7.77817	0.0656493	NA	NA	7.84158	0.0896847	2	NA	0.0549085	0.459837	0.0294928	0.0277153	0.00303526	0.00497336
OE02	16	CO	8.49567	0.237597	7.88	0.0949509	8.008	0.219201	8.12789	0.324871	3	0.378721	0.24354	0.377066	0.095229	0.076028	0.00303526	0.00497336
OE02	20	CO	6.39033	0.342203	6.38033	0.133927	7.95367	0.163926	6.90811	0.905491	3	0.010546	0.766183	0.878228	0.766853	0.409385	0.00303526	0.00497336
OE02	0	FLC	7.959	0.138992	7.895	0.118894	8.07667	0.0908222	7.97689	0.092145	3	0.532364	0.0546046	0.644437	0.0425031	0.0398733	0.00304603	0.0014806
OE02	4	FLC	7.945	0.126637	8.05933	0.0720602	8.1	0.13573	8.03478	0.0803647	3	0.842035	0.0711872	0.61909	0.0354648	0.0335432	0.00304603	0.0014806
OE02	8	FLC	7.16167	0.0585947	7.178	0.0586742	7.68933	0.118306	7.343	0.300045	3	0.950733	0.045602	1	0.231182	0.187773	0.00304603	0.0014806
OE02	12	FLC	7.78933	0.042969	7.368	0.0331914	7.419	0.103541	7.52544	0.229953	3	0.865988	0.190678	0.881209	0.15227	0.129835	0.00304603	0.0014806
OE02	16	FLC	7.46	0.0407063	7.802	0.0734484	8.18667	0.112104	7.81622	0.363542	3	0.448975	0.290002	0.720354	0.20644	0.160456	0.00304603	0.0014806
OE02	20	FLC	7.75233	0.102246	8.13833	0.149438	8.10367	0.0673399	7.99811	0.213554	3	0.0480582	0.0924997	0.635027	0.101313	0.0873734	0.00304603	0.0014806
OE02	0	FT	15.8065	0.194565	14.7447	0.264649	12.58	0.338052	14.3771	1.64436	3	0.627888	0.0775314	0.00301132	0.00640236	0.00204804	0.00127794	0.000875613
OE02	4	FT	13.9492	0.154291	11.7583	0.147178	15.4095	0.453911	13.7057	1.83772	3	0.780361	0.129304	0.00479584	0.0123467	0.00345414	0.00127794	0.000875613
OE02	8	FT	15.8327	0.19677	12.849	0.226863	NA	NA	14.3408	2.10977	2	NA	0.263471	0.00308788	0.0102401	0.00237247	0.00127794	0.000875613
OE02	12	FT	11.5247	0.103544	10.0683	0.0733871	13.382	0.237118	11.6583	1.66087	3	0.866779	0.0370475	0.0198232	0.0428593	0.0135542	0.00127794	0.000875613
OE02	16	FT	10.537	0.379288	9.74133	0.113817	NA	NA	10.1392	0.562621	2	NA	0.0164763	0.0568183	0.0270995	0.0183483	0.00127794	0.000875613
OE02	0	GI	11.1877	0.174034	11.5857	0.20155	12.7553	0.0621718	11.8429	0.814872	3	0.000147145	0.073114	0.0157058	0.011923	0.00677772	0.00106371	0.000809578
OE02	4	GI	6.085	0.0998833	6.34933	0.113317	11.0943	0.249278	7.84289	2.81893	3	0.527508	0.585378	0.251293	1.52193	0.215681	0.00106371	0.000809578
OE02	8	GI	4.724	0.0702329	4.76867	0.0772873	9.432	0.268488	6.30822	2.70536	3	0.26664	0.824041	0.728051	4.02046	0.616425	0.00106371	0.000809578
OE02	12	GI	6.584	0.0313528	6.82733	0.0676708	11.429	0.206954	8.28011	2.72973	3	0.0196957	0.807265	0.185594	1.04551	0.157615	0.00106371	0.000809578
OE02	16	GI	8.162	0.157647	8.05933	0.0947347	NA	NA	8.11067	0.0725963	2	NA	0.225917	0.208724	0.0107717	0.0102431	0.00106371	0.000809578
OE02	20	GI	14.13	0.452972	12.9372	0.184626	NA	NA	13.5336	0.843461	2	NA	NA	0.00486532	0.00386476	0.00215385	0.00106371	0.000809578
OE02	0	LHY	1.44333	NA	0.486667	0.118661	3.14433	0.124681	1.69144	1.34609	3	0.663429	0.765937	0.747828	1.15332	0.453665	0.000148116	0.000271284
OE02	4	LHY	6.23167	0.167234	4.123	0.296319	7.51333	0.234905	5.956	1.71189	3	0.732787	0.277355	0.0389083	0.0885517	0.0270312	0.000148116	0.000271284
OE02	8	LHY	8.31267	0.238494	7.51167	0.0808497	10.0423	0.0784623	8.62222	1.29342	3	0.839462	0.701928	0.00612956	0.00889452	0.00362881	0.000148116	0.000271284
OE02	12	LHY	7.31967	0.108345	6.132	0.118291	9.8845	0.0369256	7.77872	1.91791	3	0.375046	0.131632	0.0109989	0.030563	0.00808815	0.000148116	0.000271284
OE02	16	LHY	4.126	0.0586913	3.13433	0.108597	7.54533	0.285212	4.93522	2.31417	3	0.974538	0.244459	0.0789455	0.313664	0.0630712	0.000148116	0.000271284
OE02	20	LHY	3.88733	0.0633193	2.226	0.0779487	5.395	0.141816	3.83611	1.58512	3	0.198882	0.669308	0.169119	0.338294	0.112752	0.000148116	0.000271284
OE02	0	PRR5	7.16333	0.101288	6.863	0.10538	7.54333	0.120741	7.18989	0.340943	3	0.126955	0.000804006	0.0487578	0.0129981	0.0102623	0.000143974	0.000128893
OE02	4	PRR5	6.445	0.108732	6.097	0.11108	7.777	0.284663	6.773	0.886729	3	0.482473	0.030344	0.0650939	0.0552634	0.0298886	0.000143974	0.000128893
OE02	8	PRR5	2.65567	0.103409	2.21067	0.0483873	3.62867	0.103409	2.83167	0.725199	3	0.770203	0.918949	1	0.653128	0.395086	0.000143974	0.000128893
OE02	12	PRR5	4.33233	0.0644464	4.139	0.0941594	5.88367	0.0825914	4.785	0.956371	3	0.681927	0.8343	0.258219	0.242835	0.125145	0.000143974	0.000128893
OE02	16	PRR5	5.26367	0.0623324	5.35133	0.113603	7.75733	0.0907561	6.12411	1.41509	3	0.558251	0.574353	0.102065	0.170118	0.0637918	0.000143974	0.000128893
OE02	20	PRR5	6.49567	0.0997614	5.84667	0.0489013	7.29833	0.12171	6.54689	0.727188	3	0.00951243	0.718933	0.0761389	0.0499021	0.0301449	0.000143974	0.000128893
OE02	0	PRR7	6.43933	0.0903844	6.3015	0.0729692	7.58033	0.0731323	6.77372	0.701937	3	0.754186	0.0033498	0.109842	0.0688365	0.042317	0.000245518	0.000222814
OE02	4	PRR7	4.00433	0.0719537	4.216	0.0863288	5.92433	0.117419	4.71489	1.05274	3	0.698707	0.490158	0.457655	0.491737	0.237042	0.000245518	0.000222814
OE02	8	PRR7	3.252	0.0622147	NA	NA	4.589	0.12046	3.9205	0.945402	2	NA	0.705534	0.793731	0.734777	0.381559	0.000245518	0.000222814
OE02	12	PRR7	5.499	0.0376563	5.265	NA	7.13767	0.196082	5.96722	1.02036	3	0.129779	0.760858	0.192109	0.197571	0.0974011	0.000245518	0.000222814
OE02	16	PRR7	6.15233	0.0407145	6.531	0.0903807	8.99317	0.0535241	7.2255	1.54251	3	0.748949	0.13118	0.0803099	0.153633	0.0527405	0.000245518	0.000222814
OE02	20	PRR7	8.36667	0.090401	7.97367	0.0736908	9.71133	0.172856	8.68389	0.911232	3	0.329925	0.0184158	0.0292247	0.0257368	0.013685	0.000245518	0.000222814
OE02	0	PRR9	7.60633	0.0831224	8.546	0.0995239	9.42883	0.0590071	8.52706	0.911398	3	0.781478	0.120146	0.109243	0.0962284	0.0511617	0.000787372	0.0006672
OE02	4	PRR9	4.35433	0.080606	4.686	0.075754	6.95767	0.145768	5.33267	1.41703	3	0.773739	0.704165	1	1.67035	0.625517	0.000787372	0.0006672
OE02	8	PRR9	5.395	0.0763588	5.82467	0.0402036	7.516	0.126438	6.24522	1.1213	3	0.65659	0.734926	0.531243	0.624438	0.287041	0.000787372	0.0006672
OE02	12	PRR9	8.97867	0.0687847	9.404	0.171628	11.74	0.212259	10.0409	1.48676	3	0.0210262	0.133742	0.0382546	0.0689575	0.0246049	0.000787372	0.0006672
OE02	16	PRR9	8.88633	0.0816925	9.61933	0.0831003	14.3412	0.312174	10.9489	2.96052	3	0.698595	0.312953	0.020386	0.1383	0.0177671	0.000787372	0.0006672
OE02	20	PRR9	10.8093	0.230272	11.0577	0.0623405	NA	NA	10.9335	0.175598	2	NA	0.00342651	0.0206054	0.00266701	0.00236137	0.000787372	0.0006672
OE02	0	SMZ	6.78133	0.151292	6.01167	0.149701	9.52967	0.292011	7.44089	1.84942	3	0.400336	0.673248	0.329471	0.857792	0.238041	0.00483335	0.00383555
OE02	4	SMZ	6.07833	0.146023	6.32733	0.116373	10.2727	0.119119	7.55944	2.35302	3	0.101099	0.689304	0.303479	1.24697	0.244077	0.00483335	0.00383555
OE02	8	SMZ	5.589	0.16272	5.35767	0.0813429	8.7575	0.138569	6.56806	1.89964	3	0.116361	0.909253	0.603345	1.64786	0.441642	0.00483335	0.00383555
OE02	12	SMZ	4.90567	0.139781	5.07467	0.0618169	8.64483	0.106348	6.20839	2.11171	3	0.0764432	0.847032	0.77417	2.57183	0.595049	0.00483335	0.00383555
OE02	16	SMZ	5.248	0.10095	4.73383	0.148273	9.30583	0.0666546	6.42922	2.50445	3	0.196394	0.727111	0.664292	3.10511	0.547222	0.00483335	0.00383555
OE02	20	SMZ	6.683	0.108962	6.73367	0.202659	10.4193	0.384488	7.94533	2.1427	3	0.022581	0.906731	0.232254	0.79335	0.179659	0.00483335	0.00383555
OE02	0	SNZ	5.11133	0.11963	5.583	0.166292	5.768	0.142992	5.48744	0.338601	3	0.528458	0.676775	0.596576	0.157812	0.124799	0.00248079	0.00207123
OE02	4	SNZ	4.608	0.102823	4.813	0.10166	5.44467	0.130435	4.95522	0.436088	3	0.453141	0.427849	0.862741	0.304488	0.225058	0.00248079	0.00207123
OE02	8	SNZ	5.02367	0.113558	4.648	0.069258	4.88267	0.0765855	4.85144	0.18977	3	0.726945	0.836515	0.927088	0.130331	0.114267	0.00248079	0.00207123
OE02	12	SNZ	5.3	0.1198	4.88933	0.194106	5.14533	0.0660177	5.11156	0.207407	3	0.729734	0.144762	0.77414	0.11969	0.103663	0.00248079	0.00207123
OE02	16	SNZ	5.206	0.0956487	4.6945	0.123954	5.47733	0.140468	5.12594	0.397509	3	0.665187	0.7728	0.766458	0.243145	0.184588	0.00248079	0.00207123
OE02	20	SNZ	6.90767	0.109125	6.58967	0.214734	6.48733	0.145629	6.66156	0.219194	3	0.449972	0.599352	0.264377	0.0433797	0.0372652	0.00248079	0.00207123
OE02	0	SOC1	7.14117	0.146925	4.709	0.1174	4.51233	0.14936	5.45417	1.46429	3	0.128352	0.606061	0.246292	0.433297	0.157033	0.00053435	0.000799798
OE02	4	SOC1	6.02767	0.164503	3.58283	0.149979	3.99567	0.157294	4.53539	1.30873	3	0.302491	0.866833	0.465619	0.687829	0.27766	0.00053435	0.000799798
OE02	8	SOC1	5.71433	0.109226	3.30833	0.102656	3.27667	0.0856076	4.09978	1.39834	3	0.0216258	0.789477	0.629742	1.03024	0.390839	0.00053435	0.000799798
OE02	12	SOC1	7.03	0.147495	3.058	0.26067	4.53333	0.0678847	4.87378	2.00777	3	0.718526	0.572731	0.368269	1.11276	0.276696	0.00053435	0.000799798
OE02	16	SOC1	7.75033	0.1225	4.893	0.100582	4.964	0.0356324	5.86911	1.62957	3	0.0416093	0.162546	0.184731	0.386867	0.125029	0.00053435	0.000799798
OE02	20	SOC1	6.83233	0.135149	3.63633	0.109883	4.63567	0.129118	5.03478	1.63495	3	0.593173	0.335479	0.329382	0.693604	0.223327	0.00053435	0.000799798
OE02	0	SVP	4.935	0.123821	3.975	0.130154	5.99767	0.173301	4.96922	1.01177	3	0.944047	0.149923	0.41909	0.425955	0.211247	0.00121683	0.00101595
OE02	4	SVP	4.14833	0.128757	3.263	0.117574	5.525	0.14705	4.31211	1.13986	3	0.761733	0.728561	0.660873	0.795423	0.360966	0.00121683	0.00101595
OE02	8	SVP	3.74367	0.102535	2.90033	0.0807919	4.49967	0.0969656	3.71456	0.800064	3	0.939808	0.675564	1	0.741178	0.425676	0.00121683	0.00101595
OE02	12	SVP	3.87267	0.0945903	3.066	0.0639687	5.41267	0.176481	4.11711	1.19228	3	0.659087	0.875517	0.756517	0.972224	0.425457	0.00121683	0.00101595
OE02	16	SVP	4.10533	0.0721064	3.4015	0.129203	6.38633	0.0435699	4.63106	1.56032	3	0.434491	0.975178	0.529793	1.03267	0.350153	0.00121683	0.00101595
OE02	20	SVP	5.05133	0.0656252	4.15333	0.21331	5.65833	0.146767	4.95433	0.757174	3	0.787674	0.482101	0.423438	0.292247	0.172909	0.00121683	0.00101595
OE02	0	TEM1	7.4205	0.339013	6.715	0.115961	8.16467	0.105515	7.43339	0.724919	3	0.970591	0.858465	0.225009	0.146888	0.0888717	0.0039077	0.00188414
OE02	4	TEM1	8.78267	0.359282	6.94867	0.291403	9.92933	0.379724	8.55356	1.50348	3	0.747217	0.526017	0.103513	0.189974	0.0670041	0.0039077	0.00188414
OE02	8	TEM1	7.69367	0.18205	8.55167	0.155495	7.29	0.165484	7.84511	0.644323	3	0.608504	0.125507	0.169145	0.0952297	0.0609273	0.0039077	0.00188414
OE02	12	TEM1	6.29183	0.110321	6.32567	0.071143	7.41167	0.0345736	6.67639	0.636994	3	0.0507262	0.107639	0.380259	0.211076	0.135733	0.0039077	0.00188414
OE02	16	TEM1	5.2345	0.0178466	5.79733	0.113461	8.21267	0.137424	6.41483	1.5822	3	0.341513	0.340057	0.455844	0.909069	0.303604	0.0039077	0.00188414
OE02	20	TEM1	5.34017	0.0452861	6.56267	0.0809897	6.34933	0.148776	6.08406	0.652998	3	0.313378	0.611105	0.573311	0.328181	0.208709	0.0039077	0.00188414
OE02	0	TEM2	4.11067	0.292078	3.28733	0.10306	4.67267	0.067508	4.02356	0.696763	3	0.792808	0.676338	0.251216	0.155971	0.096227	0.000410494	0.000197924
OE02	4	TEM2	3.98867	0.144376	2.78233	0.294566	5.45833	0.130387	4.07644	1.34016	3	0.891609	0.978779	0.242173	0.370958	0.14652	0.000410494	0.000197924
OE02	8	TEM2	4.28267	0.170201	4.962	0.0953135	3.50467	0.117206	4.24978	0.729223	3	0.925384	0.173319	0.214757	0.141256	0.0852095	0.000410494	0.000197924
OE02	12	TEM2	5.51233	0.0956469	2.92933	0.0590649	4.922	0.144298	4.45456	1.35346	3	0.419883	0.140764	0.186339	0.289802	0.113415	0.000410494	0.000197924
OE02	16	TEM2	2.536	0.264011	2.156	0.118931	5.50533	0.0873689	3.39911	1.83391	3	0.198224	0.324708	0.387279	0.993379	0.278646	0.000410494	0.000197924
OE02	20	TEM2	3.19233	0.286691	2.91933	0.0997263	2.81333	0.11511	2.975	0.195536	3	0.524225	0.0292706	0.51963	0.075424	0.0658639	0.000410494	0.000197924
OE02	0	TOC1	6.54933	0.037238	5.773	0.0565066	9.46733	0.156567	7.26322	1.94788	3	0.126042	0.38326	0.20528	0.586708	0.152072	0.00104948	0.00181803
OE02	4	TOC1	7.683	0.0807465	7.58567	0.144148	11.84	0.400005	9.03622	2.42863	3	0.0382737	0.951515	0.0600649	0.263314	0.0489084	0.00104948	0.00181803
OE02	8	TOC1	5.05083	0.0679178	4.93033	0.0794691	8.13033	0.219757	6.03717	1.81374	3	0.152523	0.922271	0.480205	1.20796	0.343609	0.00104948	0.00181803
OE02	12	TOC1	4.436	0.076844	4.30033	0.0860852	8.28	0.293058	5.67211	2.25952	3	0.138963	0.669538	0.618471	2.34296	0.489308	0.00104948	0.00181803
OE02	16	TOC1	5.33567	0.114972	5.44067	0.0614139	9.16467	0.171296	6.647	2.181	3	0.71451	0.778236	0.314665	1.11223	0.245274	0.00104948	0.00181803
OE02	20	TOC1	6.88467	0.0848135	6.251	0.0551513	9.08467	0.160057	7.40678	1.48723	3	0.927773	0.782115	0.185837	0.335159	0.11955	0.00104948	0.00181803
OE02	0	TOE1	2.252	0.0299944	2.28967	0.151831	3.40433	0.179227	2.64867	0.654697	3	0.0549475	0.307969	0.416741	0.239328	0.152023	0.000152923	0.000168955
OE02	4	TOE1	1.34533	0.110033	1.3305	0.153543	3.07067	0.0646632	1.9155	1.00043	3	0.0141588	0.729145	0.692741	0.693156	0.346474	0.000152923	0.000168955
OE02	8	TOE1	1.016	0.0277248	0.924	0.0985021	2.21767	0.067811	1.38589	0.721808	3	0.121796	0.524755	1	0.649248	0.393663	0.000152923	0.000168955
OE02	12	TOE1	1.402	0.0394715	0.350667	0.260366	2.93467	0.0761008	1.56244	1.29945	3	0.795389	0.618085	0.884813	1.29302	0.52533	0.000152923	0.000168955
OE02	16	TOE1	1.181	0.087388	1.26433	0.106446	3.08167	0.0756131	1.84233	1.0741	3	0.074106	0.928209	0.72878	0.805602	0.382634	0.000152923	0.000168955
OE02	20	TOE1	1.72433	0.0411987	1.59533	0.118222	2.60267	0.0736229	1.97411	0.548153	3	0.225251	0.968985	0.665162	0.307446	0.210261	0.000152923	0.000168955
OE02	0	TOE2	3.778	0.0183212	3.83033	0.11111	4.95267	0.158026	4.187	0.663603	3	0.0753276	0.492547	0.398719	0.232865	0.147008	0.000424971	0.000469524
OE02	4	TOE2	3.22867	0.0815434	3.3655	0.173855	4.608	0.0828794	3.73406	0.759944	3	0.172175	0.589858	0.545779	0.378457	0.223486	0.000424971	0.000469524
OE02	8	TOE2	2.459	0.0394166	2.556	0.101601	3.56633	0.0388501	2.86044	0.613239	3	0.151205	0.561807	1	0.529689	0.346272	0.000424971	0.000469524
OE02	12	TOE2	2.92767	0.101081	2.036	0.280886	3.92867	0.111056	2.96411	0.94686	3	0.936327	0.875695	0.930665	0.863351	0.447873	0.000424971	0.000469524
OE02	16	TOE2	3.059	0.117999	3.24533	0.0749978	4.551	0.144451	3.61844	0.812973	3	0.219352	0.457909	0.591315	0.447524	0.254734	0.000424971	0.000469524
OE02	20	TOE2	3.67267	0.0715775	3.49333	0.119734	4.38233	0.130609	3.84944	0.470126	3	0.366511	0.692995	0.503827	0.194089	0.140113	0.000424971	0.000469524
OE02	0	TOE3	7.721	0.0850568	7.239	0.200969	9.612	0.205027	8.19067	1.25428	3	0.36926	0.963687	0.279042	0.386608	0.162067	0.00464438	0.00506281
OE02	4	TOE3	6.20567	0.185694	6.26217	0.154887	10.798	0.386621	7.75528	2.63523	3	0.0204744	0.952836	0.377342	1.96698	0.316605	0.00464438	0.00506281
OE02	8	TOE3	5.781	0.079137	5.54167	0.0968332	10.6435	0.226284	7.32206	2.87894	3	0.0794084	0.626096	0.509504	3.23847	0.440242	0.00464438	0.00506281
OE02	12	TOE3	5.85133	0.204779	4.54	0.270572	10.2282	0.292518	6.87317	2.97858	3	0.423884	0.960901	0.695468	4.78626	0.607234	0.00464438	0.00506281
OE02	16	TOE3	5.73867	0.0999983	5.465	0.105833	9.964	0.0431625	7.05589	2.52221	3	0.103663	0.772068	0.612734	2.90719	0.506072	0.00464438	0.00506281
OE02	20	TOE3	7.987	0.19977	6.99	0.205205	11.5022	0.269373	8.82639	2.3703	3	0.404685	0.549254	0.179597	0.749009	0.144862	0.00464438	0.00506281
OE02	0	TTG1 both	-1.93233	0.100163	-4.338	0.113841	-4.60133	0.088378	-3.62389	1.47084	3	0.224243	0.00167241	1	1.77182	0.639227	1.52185e-06	7.39734e-07
OE02	4	TTG1 both	0.262333	0.121138	-3.00033	0.0503819	-2.81133	0.111827	-1.84978	1.83158	3	0.100105	0.00608533	0.292374	0.748265	0.21023	1.52185e-06	7.39734e-07
OE02	8	TTG1 both	-1.55067	0.0912871	-3.62667	0.0574224	-3.22267	0.0962098	-2.8	1.10065	3	0.518679	0.00144719	0.564917	0.646555	0.301493	1.52185e-06	7.39734e-07
OE02	12	TTG1 both	-0.324667	0.0137598	-3.55733	0.0253114	-3.68533	0.0932488	-2.52244	1.90441	3	0.265176	0.00955351	0.46605	1.27863	0.341556	1.52185e-06	7.39734e-07
OE02	16	TTG1 both	-0.272333	0.0689372	-3.63067	0.0346314	-3.487	0.124435	-2.46333	1.89882	3	0.503704	0.0180763	0.44734	1.22083	0.32738	1.52185e-06	7.39734e-07
OE02	20	TTG1 both	-1.49833	0.0954865	-3.32	0.0902367	-4.08367	0.0642054	-2.96733	1.32826	3	0.0602077	0.00227758	0.634391	0.95856	0.381745	1.52185e-06	7.39734e-07
OE02	0	TTG1 endo	4.725	0.171385	3.666	0.161523	3.55633	0.186867	3.98244	0.645405	3	0.408276	0.478205	1	0.564179	0.360687	0.000296556	0.000144148
OE02	4	TTG1 endo	5.64933	0.228874	4.154	0.117502	4.07333	0.163024	4.62556	0.887534	3	0.437924	0.941755	0.640331	0.544289	0.294208	0.000296556	0.000144148
OE02	8	TTG1 endo	5.07267	0.142096	3.89533	0.118158	3.41633	0.0726246	4.12811	0.852349	3	0.411214	0.811255	0.903962	0.728085	0.403273	0.000296556	0.000144148
OE02	12	TTG1 endo	5.96067	0.129161	4.04133	0.0918876	3.43867	0.0632719	4.48022	1.31704	3	0.497261	0.910848	0.708197	1.0563	0.423956	0.000296556	0.000144148
OE02	16	TTG1 endo	5.76833	0.141338	3.72767	0.119091	4.71733	0.124223	4.73778	1.02049	3	0.810613	0.417641	0.592409	0.609355	0.300381	0.000296556	0.000144148
OE02	20	TTG1 endo	5.05267	0.176243	3.82	0.0928691	3.79833	0.103065	4.22367	0.718017	3	0.615462	0.964854	0.846028	0.54562	0.3317	0.000296556	0.000144148
OE02	0	TTG1 no LWD	-1.888	0.104358	-4.448	0.1319	-4.621	0.0944969	-3.65233	1.5304	3	0.26778	0.00177639	1	1.88867	0.65382	1.49214e-06	7.25292e-07
OE02	4	TTG1 no LWD	0.219333	0.111056	-3.19567	0.0418529	-3.03333	0.113267	-2.00322	1.9265	3	0.0539073	0.00749599	0.318837	0.893163	0.234961	1.49214e-06	7.25292e-07
OE02	8	TTG1 no LWD	-1.58067	0.0582266	-3.74767	0.0876546	-3.61933	0.0703965	-2.98256	1.21577	3	0.828319	0.00241245	0.628604	0.831416	0.357962	1.49214e-06	7.25292e-07
OE02	12	TTG1 no LWD	-0.487167	0.00677003	-3.789	0.028101	-3.79133	0.067582	-2.68917	1.90699	3	0.0952635	0.0107388	0.51293	1.41069	0.376158	1.49214e-06	7.25292e-07
OE02	16	TTG1 no LWD	-0.488	0.0311288	-3.93033	0.0806391	-3.79067	0.0395643	-2.73633	1.94837	3	0.5425	0.0198564	0.529976	1.5154	0.392654	1.49214e-06	7.25292e-07
OE02	20	TTG1 no LWD	-1.82067	0.0902127	-3.54167	0.0771146	-4.331	0.0379034	-3.23111	1.28366	3	0.779633	0.00252814	0.746792	1.07131	0.440045	1.49214e-06	7.25292e-07
cop1-4	0	AP2	5.658	0.104684	9.73833	0.12442	6.96733	0.0315806	7.45456	2.08334	3	0.610495	1	0.350814	1.13589	0.268033	0.00481172	0.00746684
cop1-4	4	AP2	5.884	0.110402	9.27767	0.0915551	6.31867	0.123269	7.16011	1.84669	3	0.22529	1	0.430243	1.11723	0.310622	0.00481172	0.00746684
cop1-4	8	AP2	5.28033	0.106421	8.634	0.229749	6.47067	0.045037	6.795	1.7002	3	0.683028	1	0.554144	1.24652	0.383609	0.00481172	0.00746684
cop1-4	12	AP2	4.82267	0.122382	6.93033	0.168595	6.077	0.0645884	5.94333	1.06017	3	0.791048	1	1	1.08518	0.520425	0.00481172	0.00746684
cop1-4	16	AP2	4.82633	0.0594334	9.13967	0.117925	6.28133	0.0486792	6.74911	2.19438	3	0.645385	1	0.572054	2.0462	0.447068	0.00481172	0.00746684
cop1-4	20	AP2	5.38233	0.0885061	8.30733	0.270232	6.40567	0.121216	6.69844	1.48432	3	0.672147	1	0.592501	1.06523	0.38073	0.00481172	0.00746684
cop1-4	0	CO	8.8	0.179407	11.6653	0.123993	9.94467	0.249797	10.1367	1.44228	3	0.779327	1	0.236551	0.406278	0.149504	0.00808288	0.00689874
cop1-4	4	CO	11.625	0.132003	12.1777	0.0937461	11.5732	0.162597	11.7919	0.335049	3	0.147879	1	0.0750994	0.0196325	0.0155638	0.00808288	0.00689874
cop1-4	8	CO	8.64067	0.0948754	NA	NA	8.63967	0.108767	8.64017	0.000707107	2	NA	1	0.667446	0.000327215	0.000327054	0.00808288	0.00689874
cop1-4	12	CO	7.58033	0.113761	8.89433	0.127849	7.696	0.107995	8.05689	0.72755	3	0.151976	1	1	0.655825	0.396072	0.00808288	0.00689874
cop1-4	16	CO	8.512	0.104468	10.0665	0.439424	8.30067	0.127935	8.95972	0.964305	3	0.2097	1	0.534835	0.508694	0.260719	0.00808288	0.00689874
cop1-4	20	CO	7.528	0.0877268	11.1365	0.052235	8.52167	0.266502	9.06206	1.86396	3	0.515298	1	0.498213	1.3153	0.361343	0.00808288	0.00689874
cop1-4	0	FT	9.732	0.0663023	14.6028	0.185194	11.0593	0.176713	11.7981	2.51804	3	0.509389	1	0.0758317	0.358535	0.062593	0.00842869	0.00770946
cop1-4	4	FT	8.73367	0.128846	12.8787	0.430168	10.4147	0.132809	10.6757	2.08479	3	0.792525	1	0.165091	0.535247	0.126174	0.00842869	0.00770946
cop1-4	8	FT	9.389	0.192319	12.3158	0.271652	10.1167	0.176741	10.6072	1.52382	3	0.460453	1	0.173119	0.324687	0.112914	0.00842869	0.00770946
cop1-4	12	FT	7.60733	0.0628702	9.22267	0.0685322	7.75767	0.139543	8.19589	0.892387	3	0.16106	1	0.920897	0.788513	0.424789	0.00842869	0.00770946
cop1-4	16	FT	6.78133	0.136034	9.881	0.0996995	7.56867	0.15268	8.077	1.61114	3	0.471427	1	1	2.05494	0.672661	0.00842869	0.00770946
cop1-4	20	FT	8.04467	0.134109	12.739	0.242462	7.149	0.145777	9.31089	3.00242	3	0.285937	1	0.42517	2.98189	0.372113	0.00842869	0.00770946
cop1-4	0	SMZ	6.06667	0.0861317	9.185	0.267608	6.54433	0.0759693	7.26533	1.67955	3	0.272508	1	0.338994	0.746898	0.233167	0.00381353	0.00518331
cop1-4	4	SMZ	6.63533	0.0616063	9.824	0.138556	6.336	0.127836	7.59844	1.93319	3	0.148009	1	0.269101	0.758594	0.198637	0.00381353	0.00518331
cop1-4	8	SMZ	6.26	0.214714	8.39367	0.182166	6.73367	0.0879621	7.12911	1.12045	3	0.40676	1	0.372563	0.437446	0.201203	0.00381353	0.00518331
cop1-4	12	SMZ	4.76933	0.15998	6.938	0.167973	5.40667	0.0520993	5.70467	1.11462	3	0.553748	1	1	1.16538	0.538188	0.00381353	0.00518331
cop1-4	16	SMZ	5.07733	0.289592	8.38967	0.133927	5.56267	0.0561545	6.34322	1.78881	3	0.259889	1	0.642356	1.57717	0.456451	0.00381353	0.00518331
cop1-4	20	SMZ	6.37267	0.141447	NA	NA	6.06867	0.112469	6.22067	0.21496	2	NA	1	0.699308	0.112359	0.0968054	0.00381353	0.00518331
cop1-4	0	SNZ	6.598	0.102347	7.81133	0.128912	6.427	0.128432	6.94544	0.75474	3	0.216822	1	0.296913	0.204076	0.120947	0.00354011	0.00537183
cop1-4	4	SNZ	5.26367	0.168521	6.87833	0.173504	5.611	0.121548	5.91767	0.849894	3	0.393027	1	0.60537	0.48573	0.269495	0.00354011	0.00537183
cop1-4	8	SNZ	5.05933	0.232834	6.352	0.256064	5.731	0.0463321	5.71411	0.646499	3	0.956788	1	0.697103	0.394118	0.251774	0.00354011	0.00537183
cop1-4	12	SNZ	5.36367	0.058901	5.33867	0.128656	4.87833	0.0621584	5.19356	0.273276	3	0.0873898	1	1	0.208549	0.172562	0.00354011	0.00537183
cop1-4	16	SNZ	5.23067	0.091086	6.88633	0.153645	5.44067	0.0971511	5.85256	0.901414	3	0.222974	1	0.633317	0.549653	0.294263	0.00354011	0.00537183
cop1-4	20	SNZ	6.92433	0.107146	7.9785	0.331797	5.82667	0.126587	6.90983	1.07599	3	0.97771	1	0.304333	0.337252	0.159974	0.00354011	0.00537183
cop1-4	0	SOC1	4.70133	0.111408	5.45767	0.187656	5.11417	0.0730399	5.09106	0.378696	3	0.899013	1	0.333184	0.10001	0.0769212	0.00106487	0.0023081
cop1-4	4	SOC1	4.02033	0.163571	4.605	0.184203	4.25667	0.16506	4.294	0.294116	3	0.789627	1	0.578923	0.130914	0.10677	0.00106487	0.0023081
cop1-4	8	SOC1	3.05467	0.0379385	3.78767	0.137537	3.674	0.0593801	3.50544	0.3945	3	0.276103	1	1	0.314487	0.239247	0.00106487	0.0023081
cop1-4	12	SOC1	3.23767	0.095149	5.23233	0.0496017	3.92933	0.0410041	4.13311	1.01283	3	0.665515	1	0.647222	0.658782	0.326476	0.00106487	0.0023081
cop1-4	16	SOC1	3.759	0.153495	4.79367	0.183974	4.27067	0.0348042	4.27444	0.517344	3	0.987922	1	0.586824	0.253107	0.176835	0.00106487	0.0023081
cop1-4	20	SOC1	4.16667	0.16861	5.324	0.24059	4.07667	0.0690459	4.52244	0.695625	3	0.123635	1	0.494143	0.306164	0.189038	0.00106487	0.0023081
cop1-4	0	SVP	5.202	0.124895	7.181	0.230807	5.26067	0.0483804	5.88122	1.12602	3	0.0497582	1	0.272082	0.321753	0.14742	0.00125401	0.00194598
cop1-4	4	SVP	4.196	0.0515526	6.084	0.155414	3.70833	0.140795	4.66278	1.25473	3	0.373521	1	0.633122	0.877654	0.367799	0.00125401	0.00194598
cop1-4	8	SVP	4.14967	0.0838053	5.67233	0.102561	3.788	0.0738286	4.53667	1	3	0.347276	1	0.690956	0.690959	0.345479	0.00125401	0.00194598
cop1-4	12	SVP	3.85633	0.112257	4.90167	0.0812117	3.668	0.0502759	4.142	0.664596	3	0.271522	1	0.908358	0.531502	0.335306	0.00125401	0.00194598
cop1-4	16	SVP	4.04367	0.0842219	6.47	0.0582294	4.249	0.0531758	4.92089	1.34549	3	0.145872	1	0.529405	0.815903	0.321074	0.00125401	0.00194598
cop1-4	20	SVP	5.542	0.065284	7.619	0.131442	4.58867	0.122247	5.91656	1.5495	3	0.597208	1	0.265499	0.511658	0.174797	0.00125401	0.00194598
cop1-4	0	TEM1	7.212	0.151842	8.51933	0.0459166	7.44133	0.0505602	7.72422	0.698069	3	0.315147	1	0.269745	0.167871	0.103475	0.00587368	0.00901896
cop1-4	4	TEM1	6.58467	0.138634	9.201	0.234952	8.35333	0.144332	8.04633	1.33491	3	0.617059	1	0.215768	0.328529	0.130234	0.00587368	0.00901896
cop1-4	8	TEM1	6.919	0.0435622	9.73383	0.149689	7.48767	0.111397	8.04683	1.4884	3	0.367103	1	0.215694	0.389493	0.138819	0.00587368	0.00901896
cop1-4	12	TEM1	5.132	0.0649615	7.17	0.096357	5.19967	0.0625327	5.83389	1.1576	3	0.0558276	1	1	1.23086	0.551743	0.00587368	0.00901896
cop1-4	16	TEM1	5.52433	0.0851665	8.884	0.157565	6.877	0.0594699	7.09511	1.69042	3	0.786143	1	0.41719	0.929294	0.287929	0.00587368	0.00901896
cop1-4	20	TEM1	6.74267	0.168353	8.26033	0.283837	5.42467	0.16689	6.80922	1.419	3	0.922402	1	0.508622	0.851438	0.318413	0.00587368	0.00901896
cop1-4	0	TEM2	5.457	0.0837019	6.241	0.193111	6.017	0.14473	5.905	0.403822	3	0.536737	1	0.560734	0.181122	0.136901	0.00345998	0.00531276
cop1-4	4	TEM2	4.56867	0.241815	8.232	0.300006	7.33967	0.101933	6.71344	1.91027	3	0.45023	1	0.320178	0.883301	0.234996	0.00345998	0.00531276
cop1-4	8	TEM2	6.15817	0.0751654	7.64533	0.314653	6.36433	0.0777989	6.72261	0.805722	3	0.245017	1	0.31815	0.237983	0.136144	0.00345998	0.00531276
cop1-4	12	TEM2	3.79133	0.197409	7.317	0.156527	4.351	0.0556866	5.15311	1.89476	3	0.283099	1	0.944274	2.56711	0.690342	0.00345998	0.00531276
cop1-4	16	TEM2	4.18633	0.106491	8.97317	0.374616	7.56267	0.0670249	6.90739	2.45977	3	0.555376	1	0.279903	1.25993	0.229024	0.00345998	0.00531276
cop1-4	20	TEM2	4.87383	0.278131	6.177	0.272644	4.407	0.0629444	5.15261	0.91734	3	0.491365	1	0.944602	0.839401	0.44445	0.00345998	0.00531276
cop1-4	0	TOE1	3.25333	0.245322	4.97367	0.16904	3.09967	0.0669577	3.77556	1.04044	3	0.141166	1	0.271078	0.286488	0.139285	0.000348097	0.0007545
cop1-4	4	TOE1	2.31433	0.187793	3.292	0.106064	2.2	0.173089	2.60211	0.60019	3	0.182186	1	0.611414	0.315439	0.208084	0.000348097	0.0007545
cop1-4	8	TOE1	1.78767	0.0522526	2.76833	0.300472	1.838	0.0634823	2.13133	0.552232	3	0.0870675	1	0.847332	0.395156	0.269482	0.000348097	0.0007545
cop1-4	12	TOE1	2.14833	0.0515881	2.358	0.120423	1.67167	0.0720648	2.05933	0.351716	3	0.578042	1	0.890693	0.2459	0.1927	0.000348097	0.0007545
cop1-4	16	TOE1	1.44167	0.203869	2.541	0.0547814	1.84367	0.0704793	1.94211	0.556239	3	0.706115	1	0.966085	0.454476	0.309077	0.000348097	0.0007545
cop1-4	20	TOE1	2.68167	0.238743	5.13583	0.24511	2.71267	0.0662596	3.51006	1.40805	3	0.0210244	1	0.32585	0.538884	0.203063	0.000348097	0.0007545
cop1-4	0	TOE2	4.235	0.0754652	5.63767	0.137159	4.04267	0.0857049	4.63844	0.870679	3	0.211376	1	0.20944	0.173526	0.0948996	0.000599615	0.0012017
cop1-4	4	TOE2	3.16	0.132222	4.65133	0.228985	3.68667	0.163959	3.83267	0.756311	3	0.679204	1	0.36612	0.252317	0.149374	0.000599615	0.0012017
cop1-4	8	TOE2	2.51133	0.0510947	4.071	0.190893	3.089	0.104432	3.22378	0.78852	3	0.71625	1	0.558364	0.406099	0.235106	0.000599615	0.0012017
cop1-4	12	TOE2	2.105	0.0691448	3.15	0.0606932	2.39167	0.0328228	2.54889	0.539949	3	0.513137	1	0.891413	0.404632	0.278304	0.000599615	0.0012017
cop1-4	16	TOE2	2.02233	0.05688	3.542	0.119025	2.83233	0.0888576	2.79889	0.760385	3	0.927234	1	0.749586	0.52017	0.307077	0.000599615	0.0012017
cop1-4	20	TOE2	3.455	0.139121	6.02833	0.36947	3.391	0.0870785	4.29144	1.50453	3	0.040624	1	0.26639	0.489444	0.172502	0.000599615	0.0012017
cop1-4	0	TOE3	9.54233	0.252863	NA	NA	9.82	0.262558	9.68117	0.19634	2	NA	1	0.129633	0.0188989	0.0164942	0.0050572	0.00325025
cop1-4	4	TOE3	7.704	0.242596	13.3507	0.182834	8.252	0.201903	9.76889	3.11399	3	0.168266	1	0.121985	0.934129	0.107895	0.0050572	0.00325025
cop1-4	8	TOE3	7.11733	0.150543	10.6743	0.179534	8.10867	0.07442	8.63344	1.83565	3	0.522187	1	0.267985	0.688538	0.192905	0.0050572	0.00325025
cop1-4	12	TOE3	7.038	0.0643428	10.427	0.295609	7.76267	0.0874719	8.40922	1.78462	3	0.390476	1	0.313046	0.76548	0.222183	0.0050572	0.00325025
cop1-4	16	TOE3	6.73	0.167471	NA	NA	8.007	0.215506	7.3685	0.902975	2	NA	1	0.644015	0.560241	0.299607	0.0050572	0.00325025
cop1-4	20	TOE3	8.83767	0.242164	NA	NA	8.91833	0.327707	8.878	0.0570399	2	NA	1	0.226199	0.00912241	0.00876877	0.0050572	0.00325025
OE20	0	AP2	5.94567	0.110439	9.96433	0.464067	6.84267	0.110033	7.58422	2.10947	3	0.409184	0.943255	0.320659	1.06309	0.246352	0.00481172	0.00746684
OE20	4	AP2	6.067	0.171548	9.10867	0.205176	6.89267	0.0914257	7.35611	1.5729	3	0.507215	0.895627	0.375588	0.741795	0.249341	0.00481172	0.00746684
OE20	8	AP2	5.68933	0.133586	8.94633	0.281884	5.675	0.160417	6.77022	1.88458	3	0.00726281	0.987328	0.563744	1.51786	0.411069	0.00481172	0.00746684
OE20	12	AP2	5.13167	0.212204	9.56683	0.0466565	5.42833	0.115526	6.70894	2.47945	3	0.114326	0.659961	0.588204	2.69211	0.482731	0.00481172	0.00746684
OE20	16	AP2	5.409	0.121066	9.99867	0.295933	5.98833	0.0939769	7.132	2.49945	3	0.221836	0.851837	0.438708	2.04205	0.361125	0.00481172	0.00746684
OE20	20	AP2	5.386	0.236963	9.62767	0.131097	6.10533	0.0769632	7.03967	2.26995	3	0.303892	0.839778	0.467704	1.78806	0.370731	0.00481172	0.00746684
OE20	0	CO	8.456	0.113515	12.0693	0.22089	9.156	0.236464	9.89378	1.91632	3	0.350789	0.869901	0.279925	0.776676	0.205764	0.00808288	0.00689874
OE20	4	CO	11.4	0.213499	14.6153	0.247968	NA	NA	13.0077	2.27358	2	NA	0.587118	0.0323346	0.124011	0.0256473	0.00808288	0.00689874
OE20	8	CO	9.866	0.189667	11.3277	0.216299	8.96367	0.178481	10.0524	1.19298	3	0.740711	0.176808	0.250771	0.322552	0.141084	0.00808288	0.00689874
OE20	12	CO	8.41833	0.303662	11.3727	0.0607069	7.24167	0.124082	9.01089	2.12829	3	0.534917	0.526224	0.516199	1.74062	0.39813	0.00808288	0.00689874
OE20	16	CO	8.87633	0.209998	11.6075	0.332673	8.63033	0.1866	9.70472	1.65244	3	0.142293	0.545287	0.319119	0.684078	0.217607	0.00808288	0.00689874
OE20	20	CO	7.745	0.0801852	10.4765	0.124115	7.996	0.126339	8.73917	1.5098	3	0.158938	0.827558	0.623181	1.15145	0.404345	0.00808288	0.00689874
OE20	0	FT	10.4267	0.216552	15.4853	0.27964	12.796	0.135041	12.9027	2.53102	3	0.930279	0.620448	0.0352638	0.168554	0.0291626	0.00842869	0.00770946
OE20	4	FT	10.8037	0.13055	15.2663	0.20068	12.1363	0.154137	12.7354	2.29086	3	0.56366	0.314091	0.0395976	0.154173	0.0315057	0.00842869	0.00770946
OE20	8	FT	11.6723	0.0658154	17.4377	0.441845	NA	NA	14.555	4.07671	2	NA	0.388091	0.0112183	0.178076	0.0105535	0.00842869	0.00770946
OE20	12	FT	9.84467	0.164623	14.0287	0.256919	8.90567	0.0655235	10.9263	2.72741	3	0.330411	0.219006	0.13876	0.780204	0.117808	0.00842869	0.00770946
OE20	16	FT	10.2123	0.12859	13.672	0.106897	9.29433	0.19001	11.0596	2.30853	3	0.38228	0.148869	0.126521	0.500237	0.10098	0.00842869	0.00770946
OE20	20	FT	10.9947	0.229236	14.7465	0.0310564	11.6738	0.0706034	12.4717	1.99912	3	0.326002	0.213946	0.0475416	0.142508	0.0356489	0.00842869	0.00770946
OE20	0	SMZ	5.777	0.042833	10.5133	0.308842	5.91367	0.0913856	7.40133	2.69594	3	0.048414	0.945094	0.308498	1.69049	0.260888	0.00381353	0.00518331
OE20	4	SMZ	5.86033	0.234499	9.715	0.224719	6.321	0.103105	7.29878	2.10515	3	0.209385	0.864788	0.331226	1.09385	0.25424	0.00381353	0.00518331
OE20	8	SMZ	5.93067	0.104817	9.97633	0.455256	5.346	0.183735	7.08433	2.52155	3	0.221917	0.979483	0.384308	1.82238	0.317378	0.00381353	0.00518331
OE20	12	SMZ	4.24067	0.128209	9.24033	0.119379	4.25133	0.13854	5.91078	2.88348	3	0.0035325	0.916437	0.866871	5.53003	0.749398	0.00381353	0.00518331
OE20	16	SMZ	4.65033	0.0797893	10.0637	0.265174	4.89267	0.119634	6.53556	3.05784	3	0.075698	0.930622	0.562183	4.11924	0.494671	0.00381353	0.00518331
OE20	20	SMZ	5.06133	0.2223	10.5492	0.396571	6.221	0.139297	7.27717	2.89235	3	0.385484	0.592121	0.336225	2.16018	0.290941	0.00381353	0.00518331
OE20	0	SNZ	6.16133	0.15472	8.03367	0.241105	6.518	0.225655	6.90433	0.994157	3	0.344458	0.95743	0.305495	0.303026	0.152128	0.00354011	0.00537183
OE20	4	SNZ	5.64067	0.10462	6.708	0.11684	6.03233	0.122798	6.127	0.539927	3	0.708877	0.740075	0.523607	0.237665	0.163467	0.00354011	0.00537183
OE20	8	SNZ	7.168	0.0855862	6.03633	0.304909	5.31133	0.118302	6.17189	0.935727	3	0.759759	0.528587	0.507566	0.463333	0.242221	0.00354011	0.00537183
OE20	12	SNZ	6.15033	0.142742	6.827	0.0996126	5.05067	0.137886	6.00933	0.896521	3	0.739059	0.251663	0.568102	0.489461	0.262929	0.00354011	0.00537183
OE20	16	SNZ	5.61	0.103653	6.94433	0.0571897	5.10267	0.0940549	5.88567	0.951277	3	0.515519	0.967198	0.618947	0.577839	0.298844	0.00354011	0.00537183
OE20	20	SNZ	6.31533	0.0472052	7.69733	0.119099	6.34233	0.130669	6.785	0.790219	3	0.0326294	0.879853	0.331839	0.242023	0.139951	0.00354011	0.00537183
OE20	0	SOC1	6.66233	0.172165	6.66933	0.110791	6.40867	0.0886811	6.58011	0.148516	3	0.0450127	0.0120044	0.118695	0.01287	0.011611	0.00106487	0.0023081
OE20	4	SOC1	5.484	0.0662646	5.91367	0.156699	5.60567	0.0956225	5.66778	0.221465	3	0.531444	0.00379079	0.223395	0.0370649	0.0317904	0.00106487	0.0023081
OE20	8	SOC1	5.33667	0.0889906	4.60633	0.176342	4.54667	0.0376519	4.82989	0.439895	3	0.129625	0.0182034	0.399303	0.142354	0.104942	0.00106487	0.0023081
OE20	12	SOC1	4.50033	0.148547	6.24	0.0606218	5.62833	0.100311	5.45622	0.882512	3	0.675879	0.164556	0.258677	0.218215	0.118365	0.00106487	0.0023081
OE20	16	SOC1	5.6925	0.151445	6.754	0.137694	6.828	0.0715169	6.42483	0.635298	3	0.111294	0.0114699	0.132183	0.0731315	0.0470826	0.00106487	0.0023081
OE20	20	SOC1	5.28317	0.20911	5.84767	0.106964	6.09967	0.157691	5.7435	0.418098	3	0.584653	0.0730205	0.211972	0.0712575	0.0533299	0.00106487	0.0023081
OE20	0	SVP	4.54867	0.0355059	7.399	0.287402	4.526	0.0592621	5.49122	1.65222	3	0.0131007	0.754608	0.356534	0.764115	0.243103	0.00125401	0.00194598
OE20	4	SVP	3.60833	0.169489	6.22867	0.170007	3.92367	0.0885983	4.58689	1.43054	3	0.210924	0.948297	0.667317	1.13142	0.419747	0.00125401	0.00194598
OE20	8	SVP	3.63433	0.100754	5.917	0.20852	3.06133	0.118175	4.20422	1.51072	3	0.364401	0.768802	0.870014	1.60912	0.564696	0.00125401	0.00194598
OE20	12	SVP	2.795	0.11989	6.51733	0.231269	2.69767	0.120775	4.00333	2.17773	3	0.042684	0.924261	1	3.52442	0.778977	0.00125401	0.00194598
OE20	16	SVP	3.41433	0.0453358	7.11233	0.283941	3.77267	0.115006	4.76644	2.03948	3	0.167996	0.918861	0.589224	1.83307	0.445895	0.00125401	0.00194598
OE20	20	SVP	4.02867	0.218029	6.88767	0.0907818	4.59967	0.0602218	5.172	1.51299	3	0.362562	0.583596	0.444832	0.824725	0.28897	0.00125401	0.00194598
OE20	0	TEM1	6.955	0.199529	9.63967	0.103488	7.20467	0.104882	7.93311	1.48318	3	0.160935	0.840199	0.233384	0.419076	0.149903	0.00587368	0.00901896
OE20	4	TEM1	6.22933	0.10504	10.301	0.240906	7.49633	0.108832	8.00889	2.08366	3	0.589998	0.980553	0.221442	0.717211	0.169201	0.00587368	0.00901896
OE20	8	TEM1	8.40167	0.105477	9.83933	0.225578	6.18233	0.0933238	8.14111	1.84237	3	0.765498	0.948481	0.202049	0.522496	0.145705	0.00587368	0.00901896
OE20	12	TEM1	5.83933	0.0807733	8.35033	0.264102	4.21267	0.0701308	6.13411	2.08452	3	0.765517	0.840827	0.812127	2.63239	0.620649	0.00587368	0.00901896
OE20	16	TEM1	5.658	0.0491528	8.9925	0.227382	5.48333	0.0287518	6.71128	1.97753	3	0.0843724	0.811194	0.544352	1.5994	0.406127	0.00587368	0.00901896
OE20	20	TEM1	6.696	0.068374	8.26567	0.233618	5.50667	0.0431354	6.82278	1.38386	3	0.848316	0.991116	0.503866	0.811053	0.310789	0.00587368	0.00901896
OE20	0	TEM2	3.62	0.175726	7.75567	0.152314	4.65733	0.165004	5.34433	2.15172	3	0.464945	0.698188	0.827055	2.84803	0.640932	0.00345998	0.00531276
OE20	4	TEM2	3.521	0.218728	9.04133	0.15152	6.08233	0.102948	6.21489	2.76255	3	0.920614	0.811276	0.452346	2.61726	0.385687	0.00345998	0.00531276
OE20	8	TEM2	7.01667	0.157195	8.991	0.236011	4.55	0.0894986	6.85256	2.22504	3	0.877925	0.931282	0.290746	1.06857	0.228558	0.00345998	0.00531276
OE20	12	TEM2	4.95267	0.117787	8.30933	0.236387	3.658	0.0647431	5.64	2.40063	3	0.52145	0.7971	0.673798	2.8841	0.546194	0.00345998	0.00531276
OE20	16	TEM2	4.58367	0.217946	9.061	0.479055	4.57133	0.0505833	6.072	2.58856	3	0.00454982	0.706113	0.499442	2.50469	0.416409	0.00345998	0.00531276
OE20	20	TEM2	5.24133	0.0488706	6.59617	0.0849166	3.37367	0.0511143	5.07039	1.61804	3	0.825013	0.943553	1	2.06957	0.674222	0.00345998	0.00531276
OE20	0	TOE1	2.984	0.208501	4.73533	0.164209	2.923	0.0557375	3.54744	1.02919	3	0.0566067	0.800537	0.317513	0.330494	0.161937	0.000348097	0.0007545
OE20	4	TOE1	2.28333	0.0560833	2.88633	0.100186	1.77433	0.0774941	2.31467	0.556662	3	0.906864	0.576074	0.746217	0.351365	0.238884	0.000348097	0.0007545
OE20	8	TOE1	2.15567	0.123383	2.46833	0.0968005	1.08333	0.023029	1.90244	0.726393	3	0.414278	0.687868	0.993016	0.649927	0.392824	0.000348097	0.0007545
OE20	12	TOE1	1.385	0.155891	3.149	0.0887468	1.143	0.0590565	1.89233	1.09501	3	0.211474	0.821306	1	1.13615	0.531867	0.000348097	0.0007545
OE20	16	TOE1	1.44783	0.150641	3.28867	0.0871761	1.62067	0.0566009	2.11906	1.01659	3	0.162546	0.808034	0.854574	0.874345	0.432173	0.000348097	0.0007545
OE20	20	TOE1	1.9165	0.192462	4.00667	0.121175	2.355	0.0890393	2.75939	1.1022	3	0.382461	0.509599	0.548265	0.628761	0.29288	0.000348097	0.0007545
OE20	0	TOE2	2.74433	0.152149	5.30767	0.151939	3.84033	0.0353082	3.96411	1.28614	3	0.840636	0.499242	0.334237	0.480884	0.197185	0.000599615	0.0012017
OE20	4	TOE2	2.165	0.139083	4.15767	0.143215	3.382	0.0635426	3.23489	1.00445	3	0.757103	0.459795	0.55408	0.5575	0.277893	0.000599615	0.0012017
OE20	8	TOE2	3.18767	0.0738738	3.41067	0.245846	2.36933	0.0412351	2.98922	0.548296	3	0.391112	0.696524	0.65694	0.303741	0.207707	0.000599615	0.0012017
OE20	12	TOE2	1.49933	0.0993948	3.6785	0.0794512	1.97133	0.136023	2.38306	1.14644	3	0.395984	0.835985	1	1.21367	0.548262	0.000599615	0.0012017
OE20	16	TOE2	1.933	0.100881	4.24433	0.287434	2.81067	0.102799	2.996	1.16676	3	0.736437	0.820259	0.653861	0.814101	0.362618	0.000599615	0.0012017
OE20	20	TOE2	2.81333	0.0676782	5.18367	0.159469	4.28967	0.288873	4.09556	1.19703	3	0.730899	0.868909	0.305131	0.394434	0.172041	0.000599615	0.0012017
OE20	0	TOE3	8.97067	0.232917	13.121	0.198071	9.77633	0.284789	10.6227	2.2008	3	0.351562	0.536509	0.0674985	0.242816	0.0528165	0.0050572	0.00325025
OE20	4	TOE3	7.47833	0.0608961	15.0083	0.390999	8.581	0.291842	10.3559	4.06668	3	0.259726	0.852958	0.0812087	1.2796	0.0763624	0.0050572	0.00325025
OE20	8	TOE3	8.14	0.233353	NA	NA	7.194	0.0994317	7.667	0.668923	2	NA	0.473013	0.523647	0.308892	0.194286	0.0050572	0.00325025
OE20	12	TOE3	6.48467	0.209805	NA	NA	6.98267	0.198655	6.73367	0.352139	2	NA	0.242243	1	0.276452	0.216578	0.0050572	0.00325025
OE20	16	TOE3	6.76883	0.161496	12.855	0.267516	7.85067	0.160841	9.15817	3.24693	3	0.319661	0.446755	0.186274	1.5821	0.166653	0.0050572	0.00325025
OE20	20	TOE3	7.16283	0.235053	NA	NA	9.261	0.217667	8.21192	1.48363	2	NA	0.639824	0.358924	0.644811	0.230577	0.0050572	0.00325025
