# Supplementary material for: TRANSPARENT TESTA GLABRA 1 participates in flowering time regulation in Arabidopsis thaliana
Source: PeerJ. 2020 Jan 20;8:e8303. doi: 10.7717/peerj.8303 (PMC6977477; doi:10.7717/peerj.8303)
Supplement: Table S9 [file peerj-08-8303-s019.xlsx]

## Sheet: Tabelle1
Supplementary Table S9. TTG1, LWD1 and LWD2 CDS used for Figure S2.
gene name	AGI	CDS
TTG1	AT5G24520	ATGGATAATTCAGCTCCAGATTCGTTATCCAGATCGGAAACCGCCGTCACATACGACTCACCATATCCACTCTACGCCATGGCTTTCTCTTCTCTCCGCTCATCCTCCGGTCACAGAATCGCCGTCGGAAGCTTCCTCGAAGATTACAACAACCGCATCGACATTCTCTCTTTCGATTCCGATTCAATGACCGTTAAGCCTCTCCCGAATCTCTCCTTCGAGCATCCTTATCCTCCAACAAAGCTAATGTTCAGTCCTCCTTCTCTCCGTCGTCCTTCCTCCGGAGATCTCCTCGCTTCCTCCGGCGATTTCCTCCGTCTTTGGGAAATTAACGAAGATTCATCAACCGTCGAGCCAATCTCGGTTCTCAACAACAGCAAAACGAGCGAGTTTTGTGCG…
LWD1	AT1G12910	ATGGGAACGAGCAGCGATCCGATTCAAGATGGTTCCGATGAGCAGCAGAAGCGATCAGAGATCTATACATACGAAGCGCCATGGCACATCTACGCAATGAATTGGAGCGTTCGTCGCGATAAGAAGTATCGTCTCGCCATCACTAGCCTCCTCGAGCAATACCCGAACCGTGTCGAGATTGTGCAGCTCGATGAATCCAATGGTGAGATCCGTTCCGATCCTAACCTCTCCTTTGAGCATCCTTATCCACCAACGAAGACCATTTTCATACCTGACAAGGAATGCCAAAGACCTGATCTTCTCGCTACTTCAAGTGATTTCCTTCGTTTATGGAGAATCGCTGATGATCATTCCCGTGTTGAGCTCAAATCTTGTCTCAATAGCAATAAGAACAGTGAG…
LWD2	AT3G26640	ATGGTTACGAGCAGCGATCAAATCCAAAATGGTTCTGAAGAGCAATCAAAAAGATCAGAGATTTACACATACGAAGCACCATGGCAGATCTACGCAATGAACTGGAGCATTCGTCGAGACAAGAAGTATCGGCTCGCAATCACAAGCCTCATCGAGCAATATCCGAATCGCGTCGAAATTGTTCAGCTTGATGAATCAAATGGTGAGATTCGTTCAGATCCAAATCTCTGCTTCGAACATCCTTACCCACCAACGAAAACCAGTTTCATACCCGATAAAGAATGTCAAAGACCCGATCTTTTAGCTACTTCTAGTGATTTCCTTCGTTTATGGCGAATCTCTGATGATGAATCTCGTGTTGAGCTTAAGTCTTGTCTTAGTAGTGATAAGAATAGTGAG…
